# Supplementary material
Source: PubMed Central journal article supplement (PMC7479540)

Parameter Value  
Solvent: DMSO  
Temperature [K]: 24.0  
Spectrometer Frequency [MHz]: 499.83  
Nucleus: <sup>1</sup>H

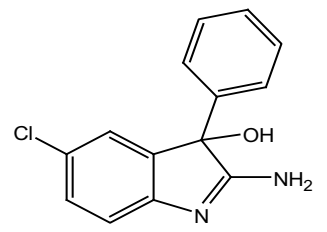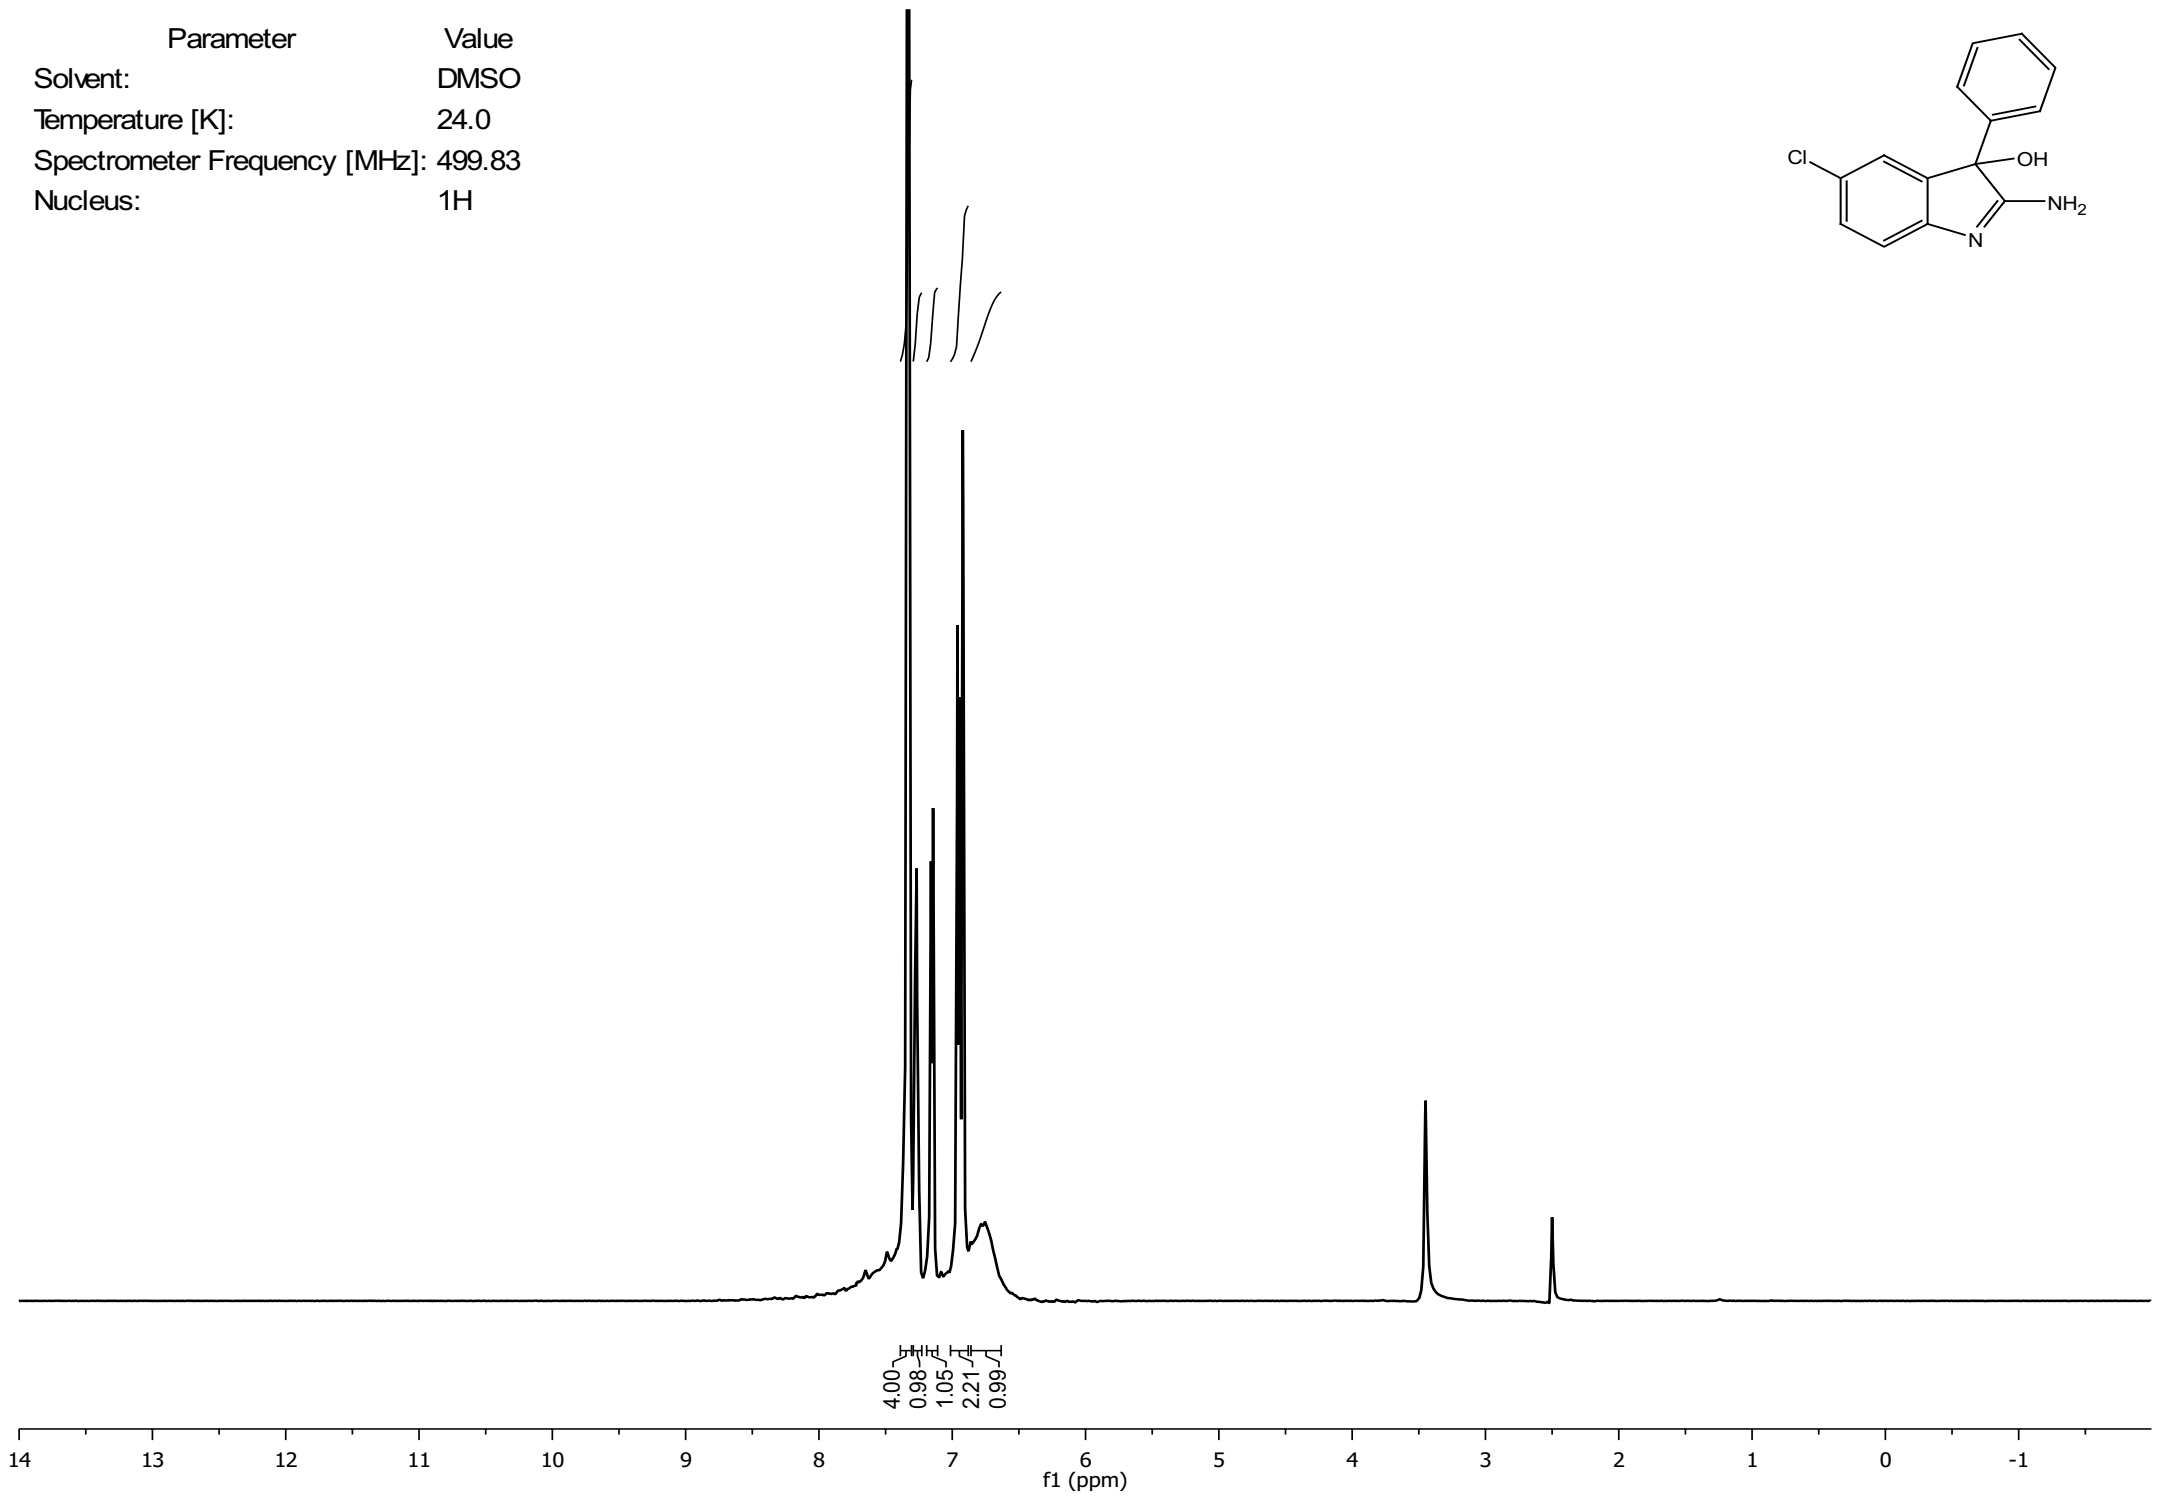

Parameter Value  
Solvent: DMSO  
Temperature [K]: 22.0  
Spectrometer Frequency [MHz]: 125.69  
Nucleus: <sup>13</sup>C

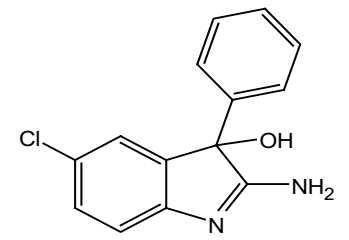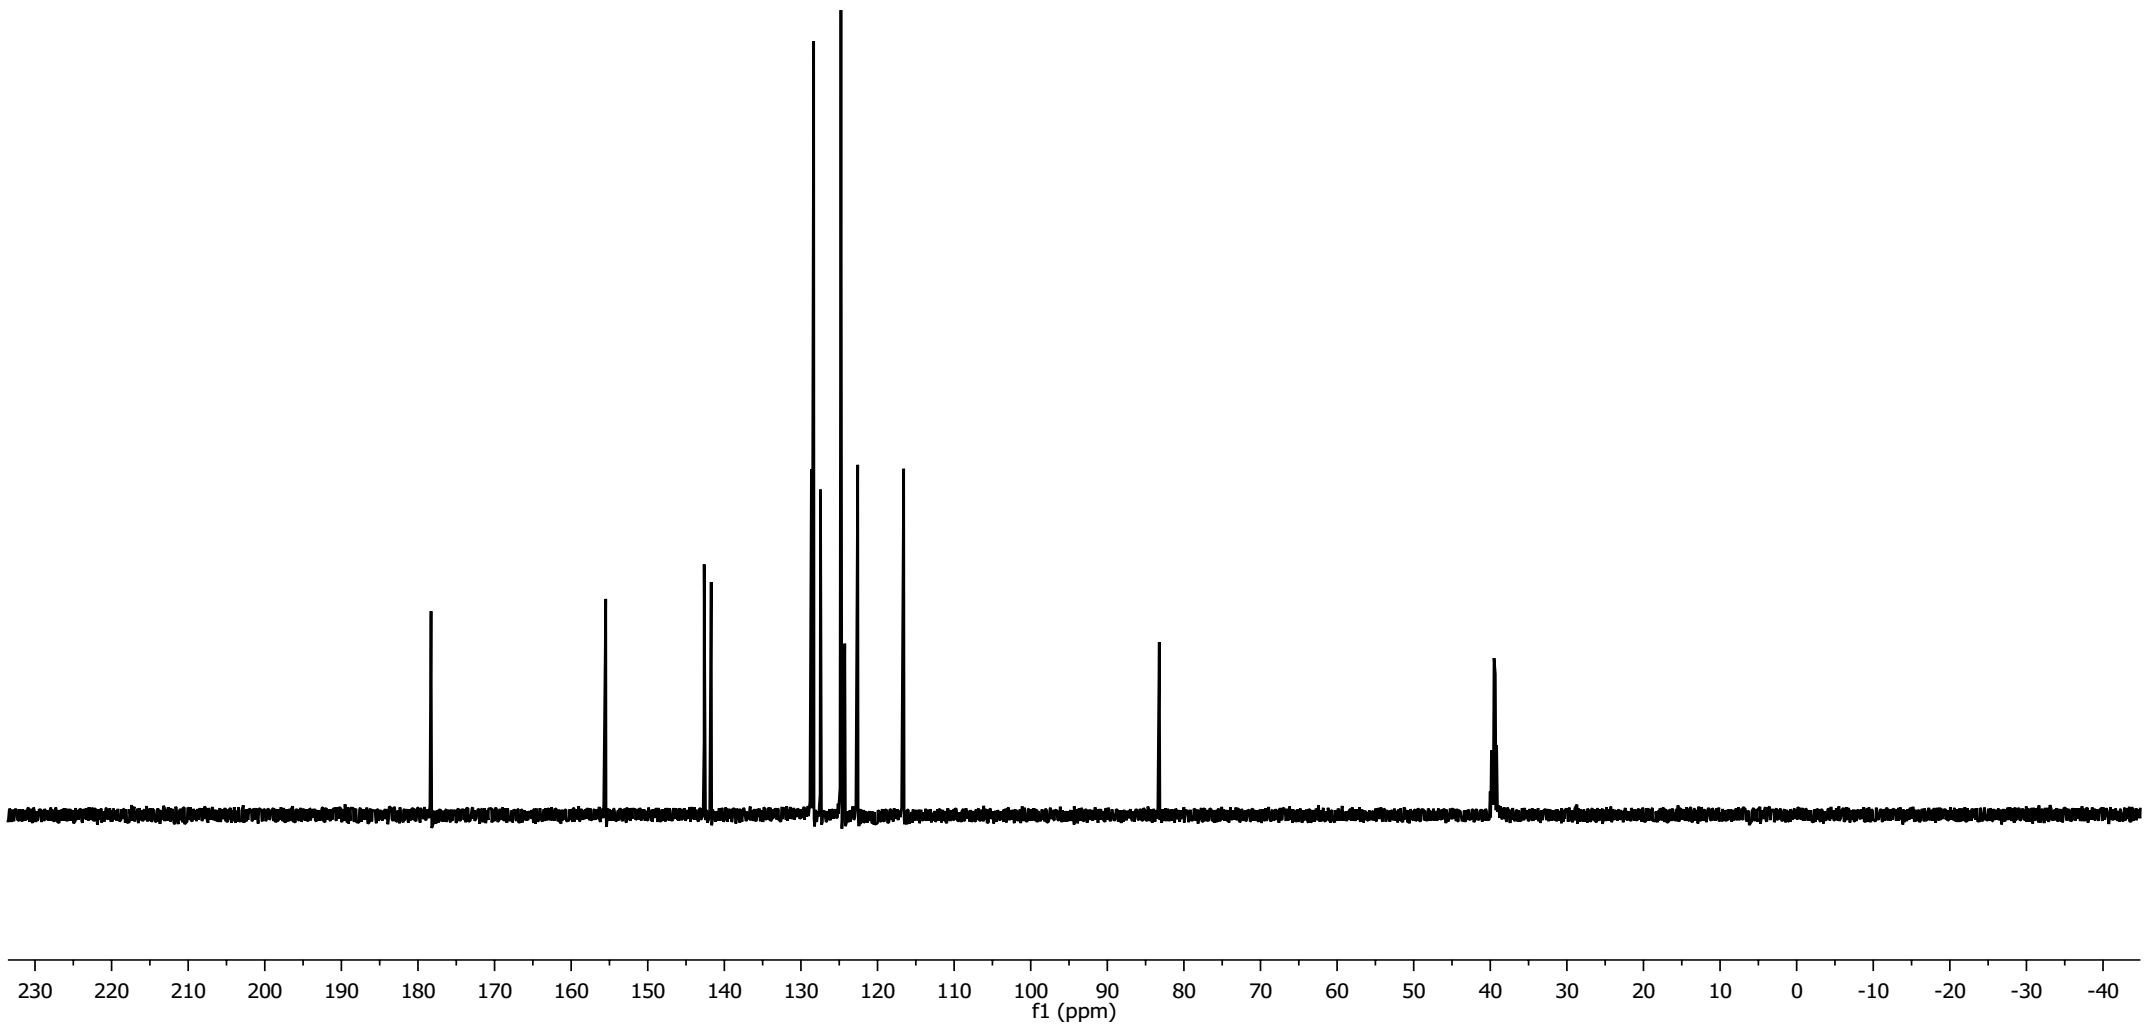

Parameter Value  
Solvent: DMSO  
Temperature [C]: 24.0  
Spectrometer Frequency [MHz]: 499.83  
Nucleus: 1H

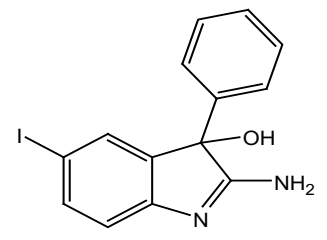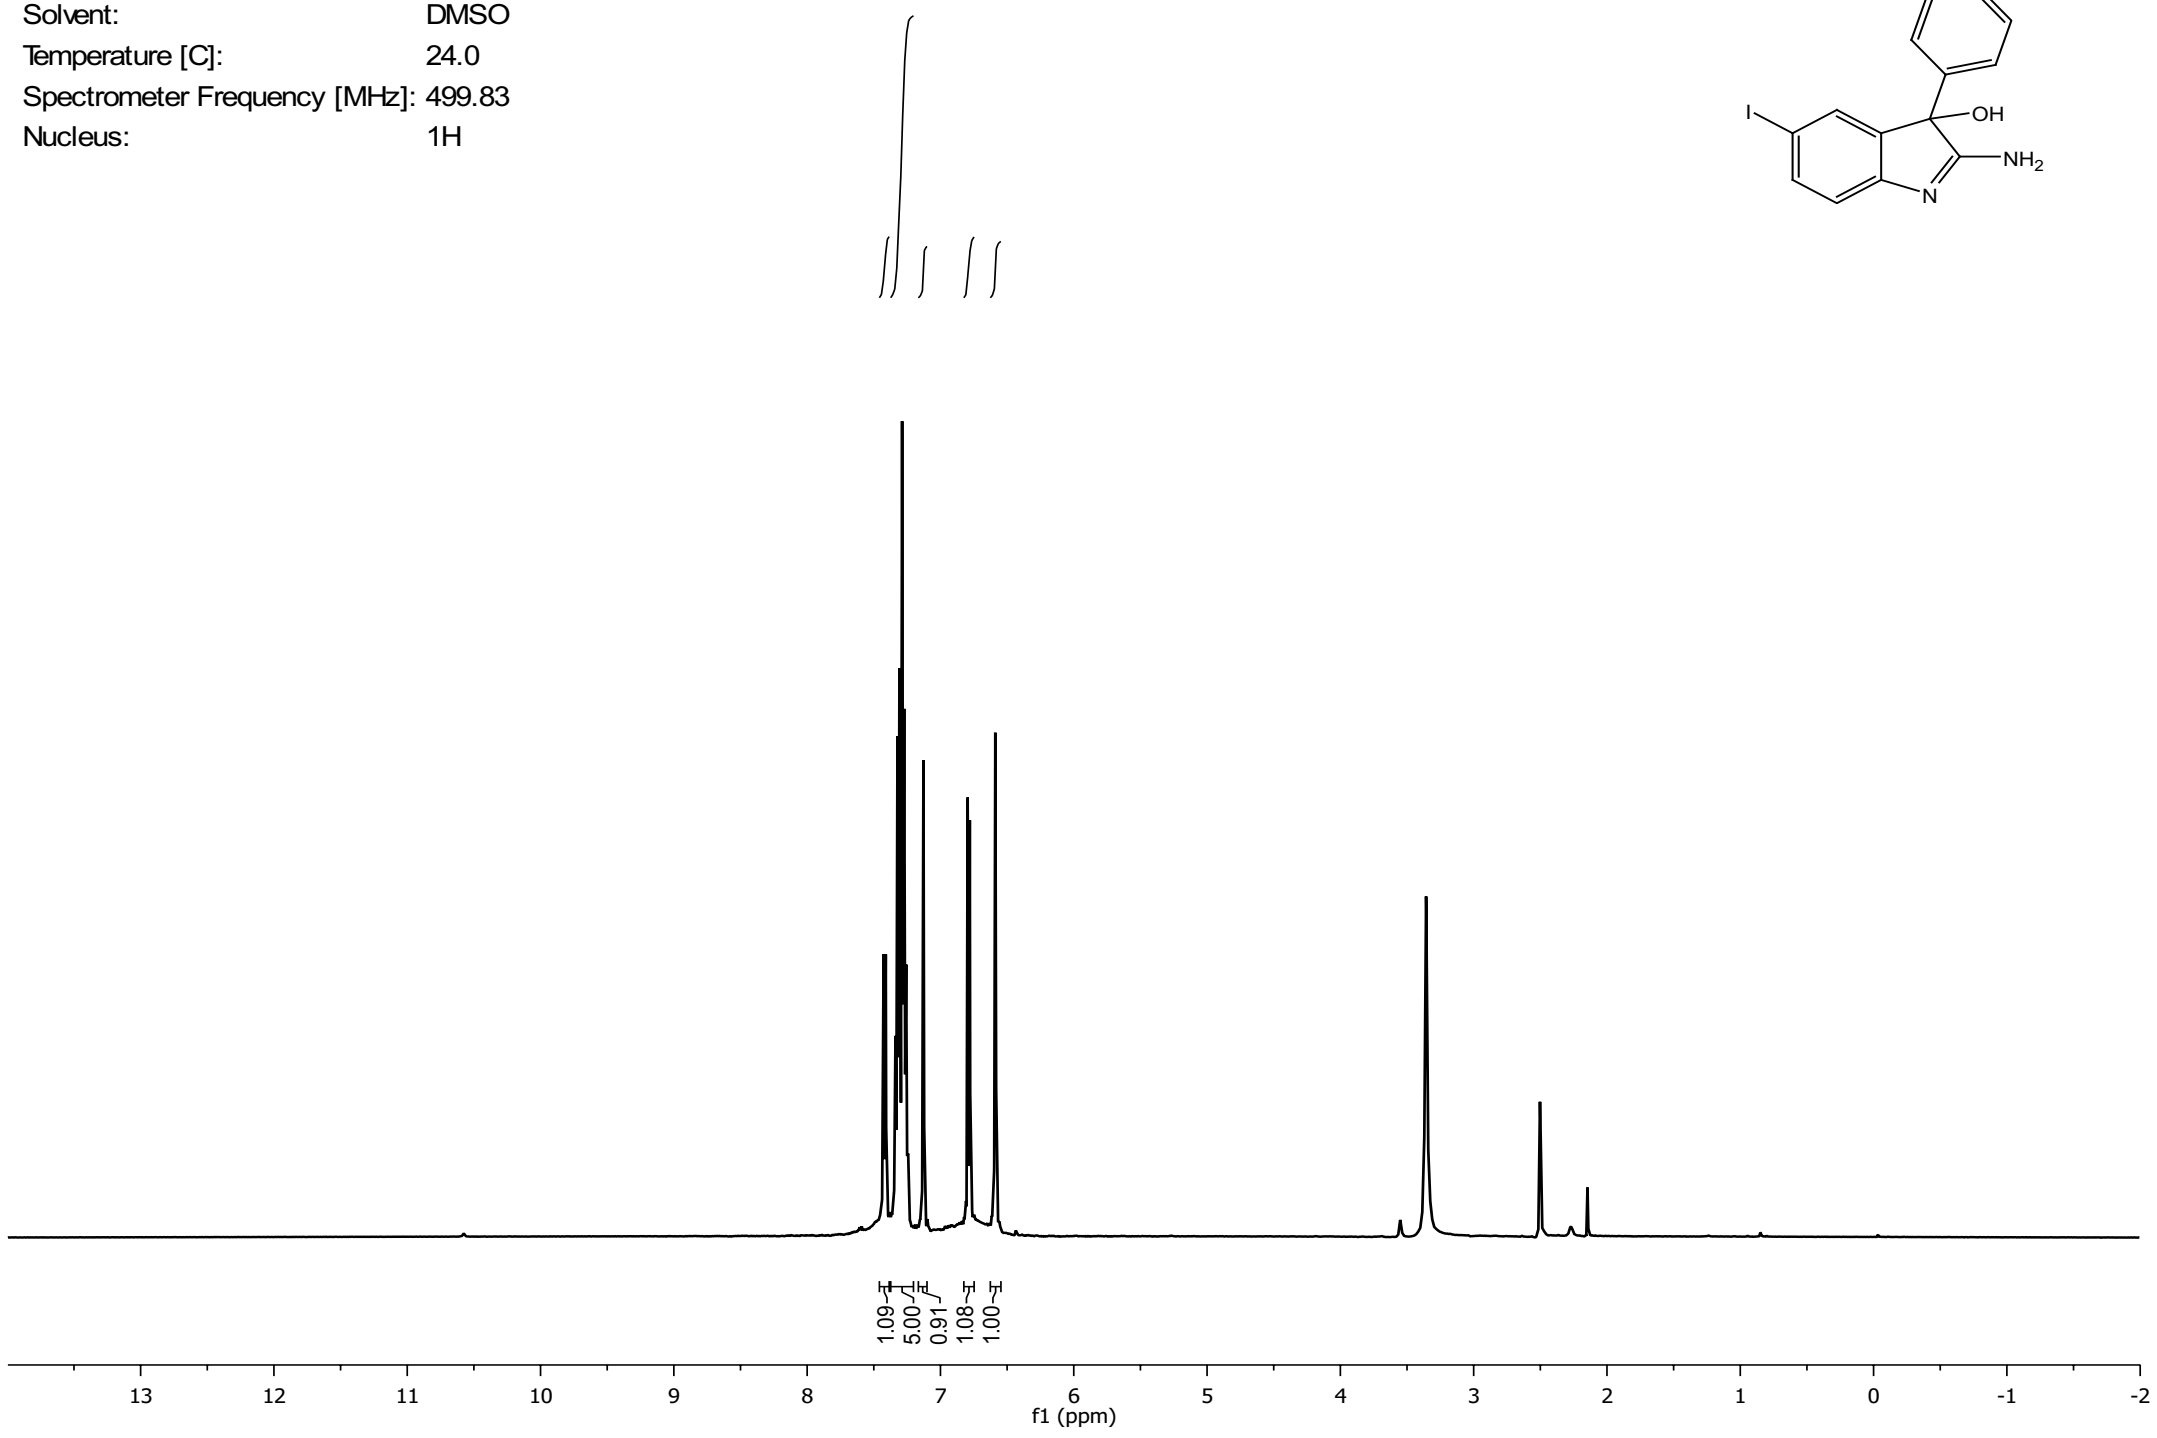

Parameter Value  
Solvent: DMSO  
Temperature [K]: 22.0  
Spectrometer Frequency [MHz]: 125.69  
Nucleus: <sup>13</sup>C

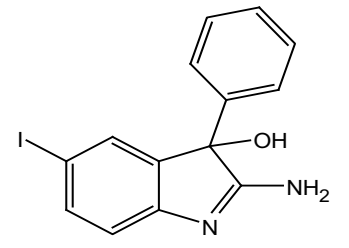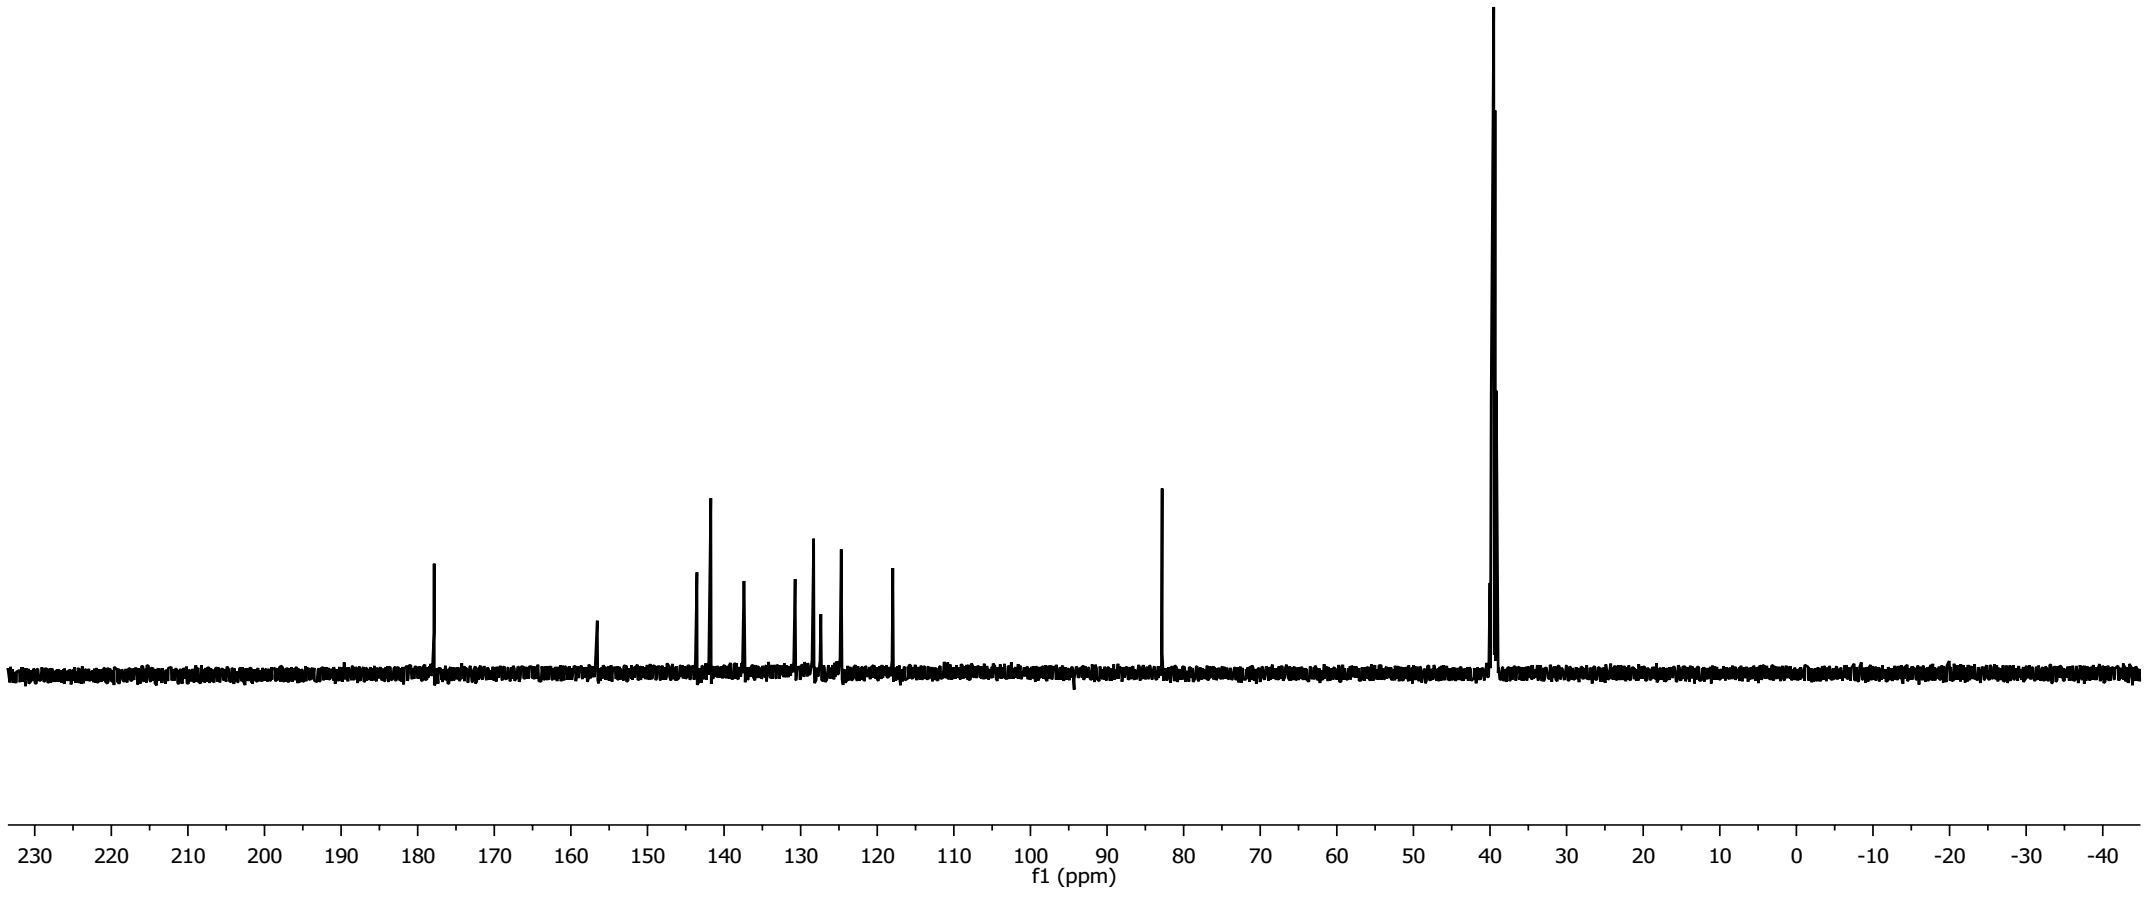

Parameter Value  
Solvent: DMSO  
Temperature [C]: 24.0  
Spectrometer Frequency [MHz]: 499.83  
Nucleus: <sup>1</sup>H

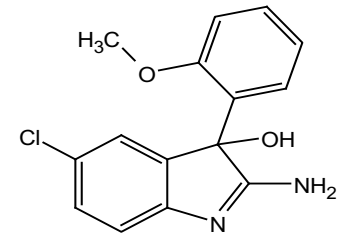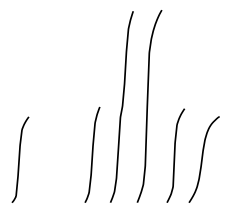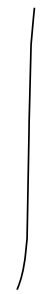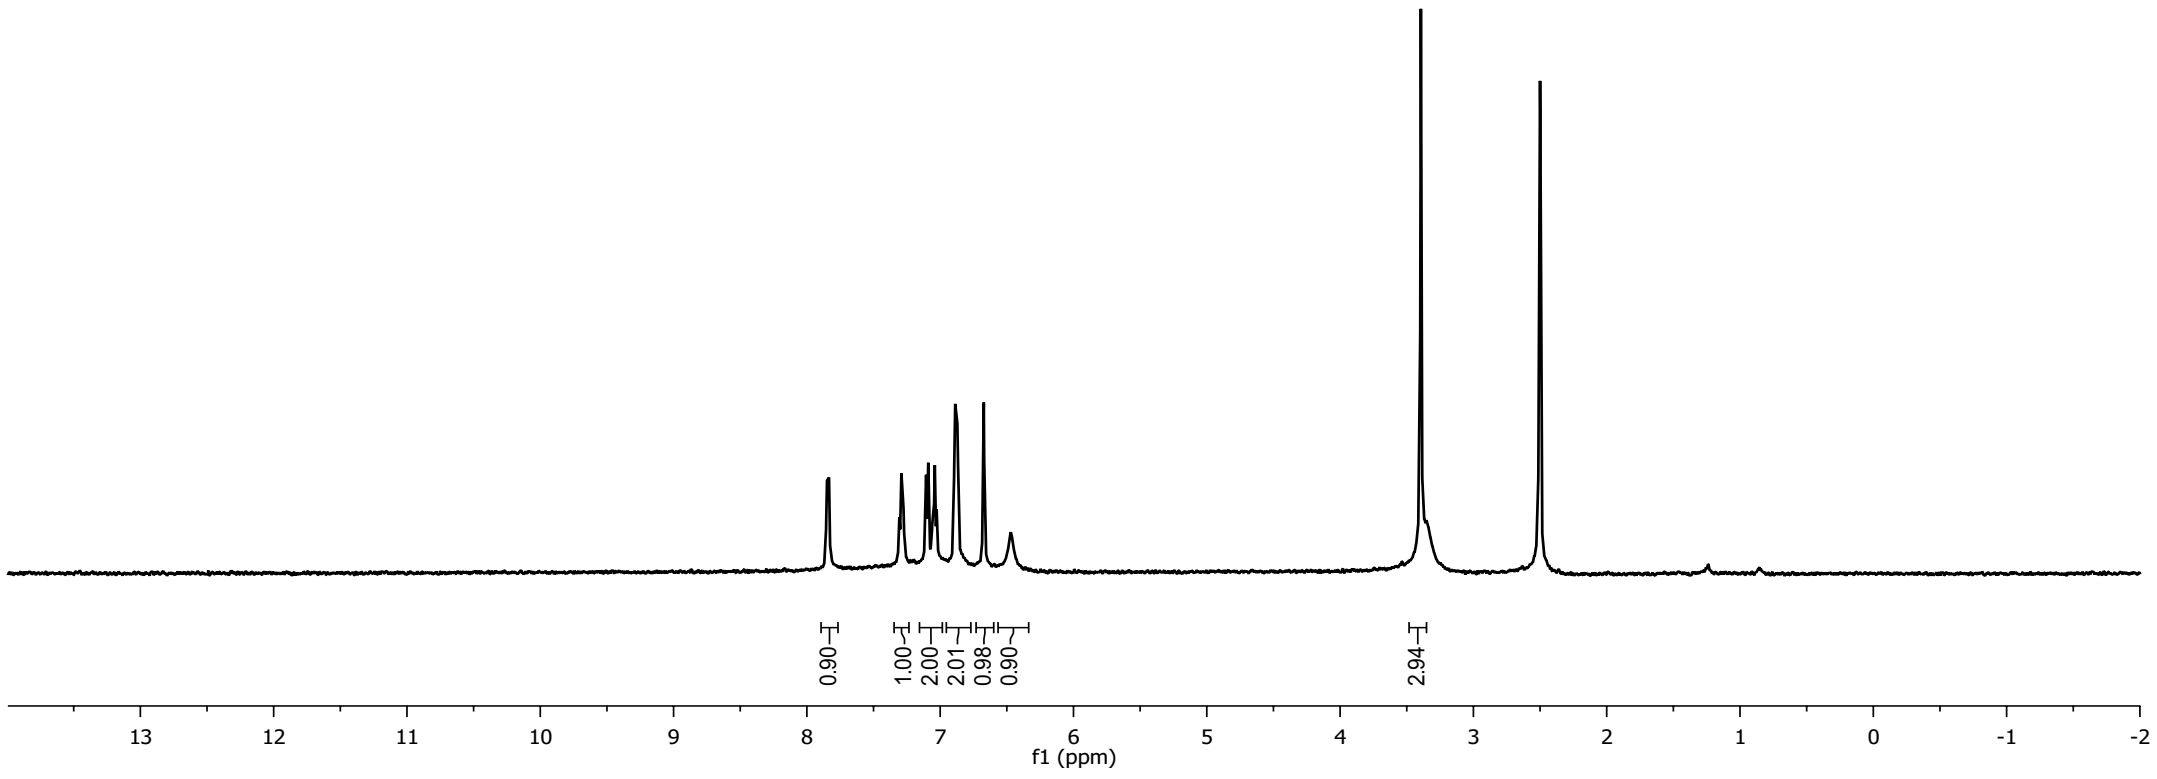

Parameter Value  
Solvent: DMSO  
Temperature [C]: 22.0  
Spectrometer Frequency [MHz]: 125.69  
Nucleus: <sup>13</sup>C

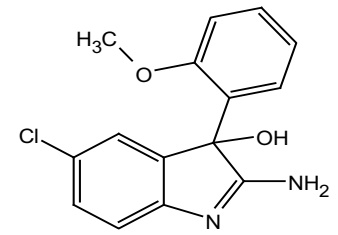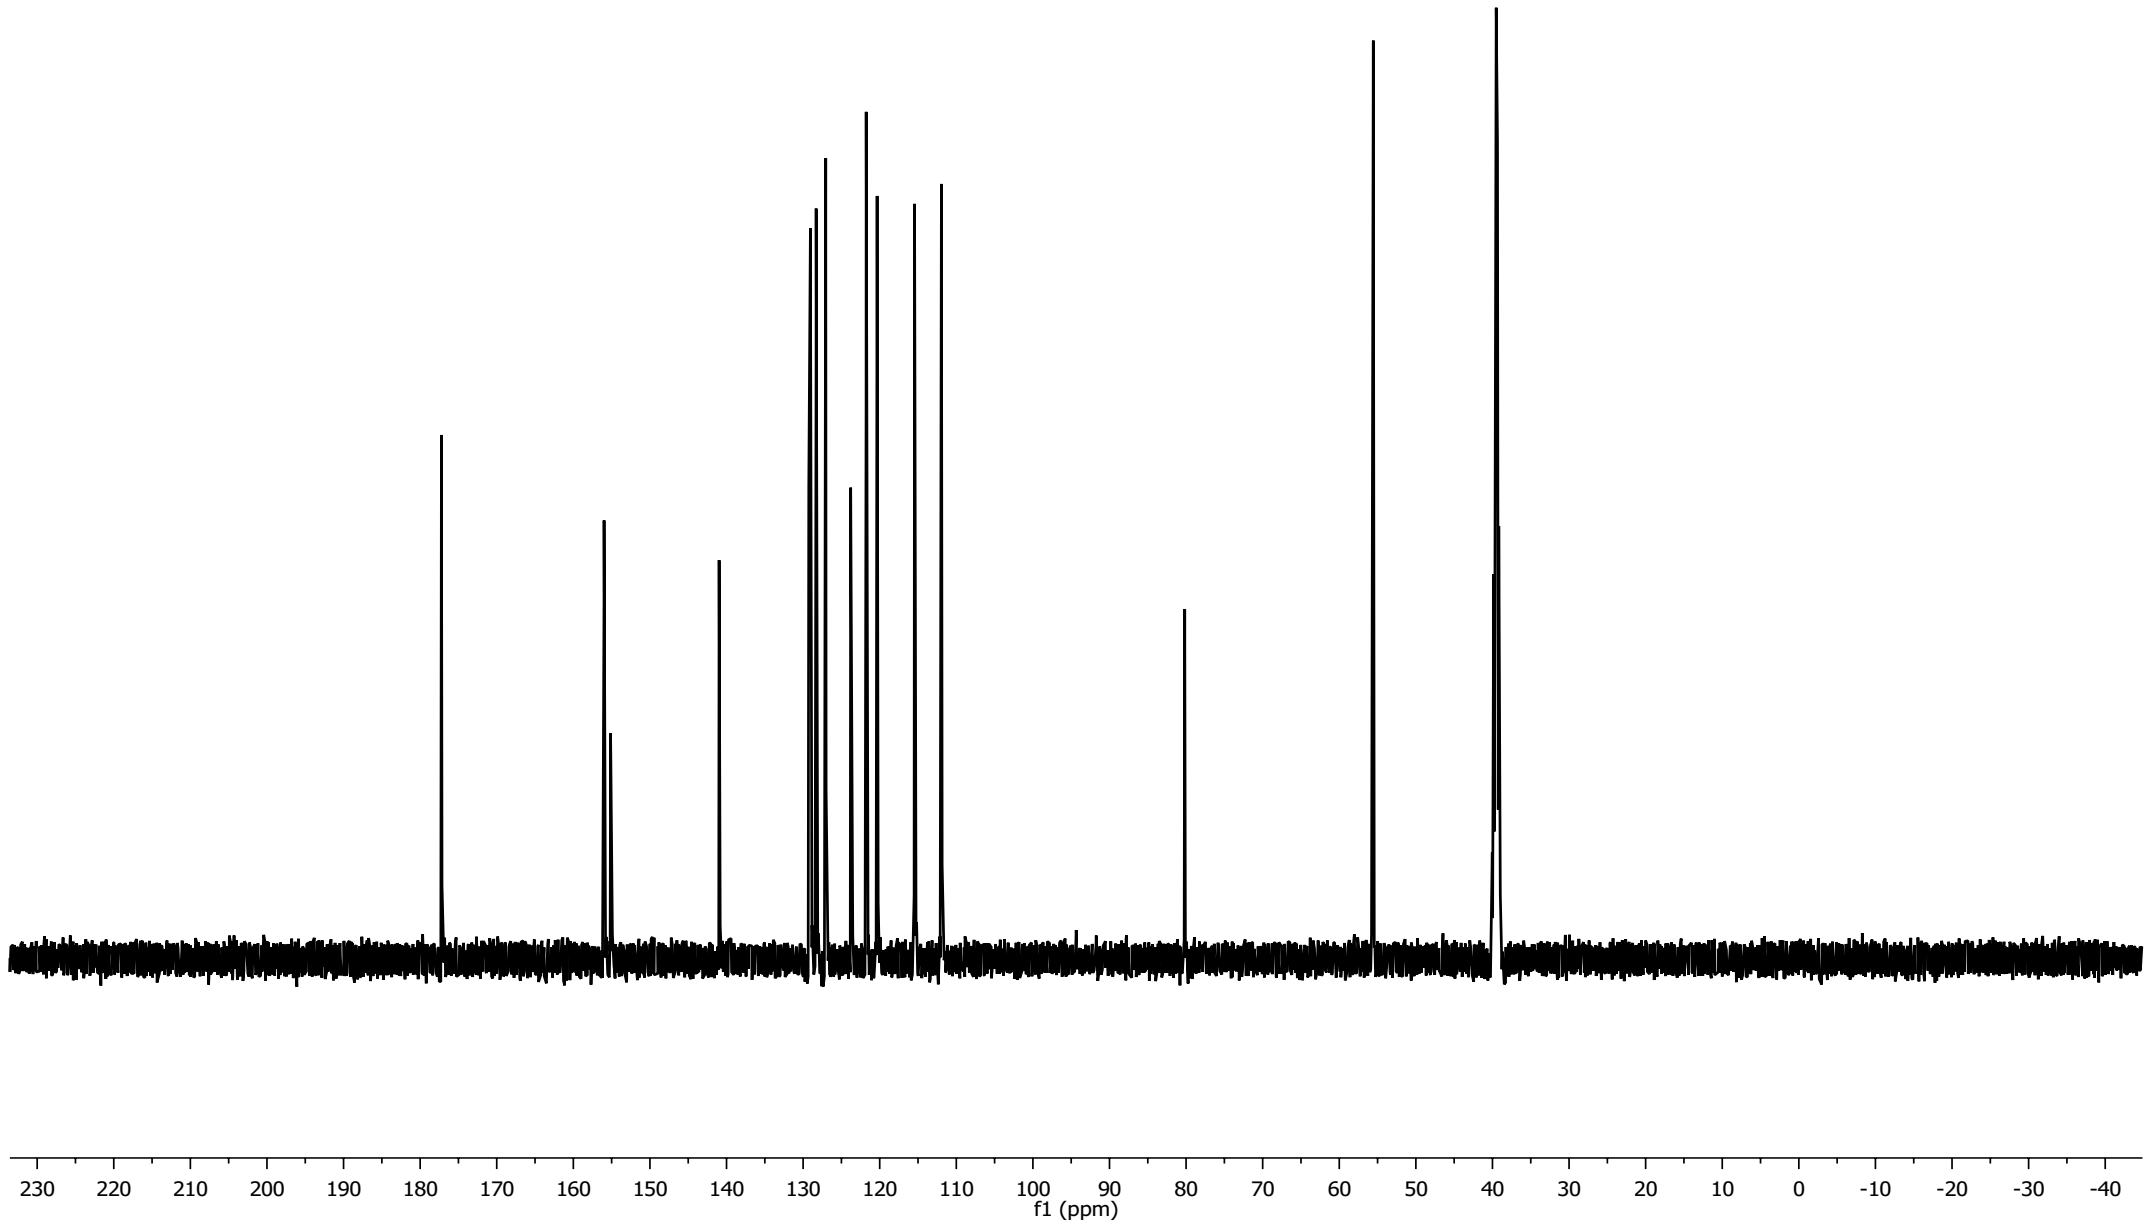

Parameter Value  
Solvent: DMSO  
Temperature [C]: 24.0  
Spectrometer Frequency [MHz]: 499.83  
Nucleus: 1H

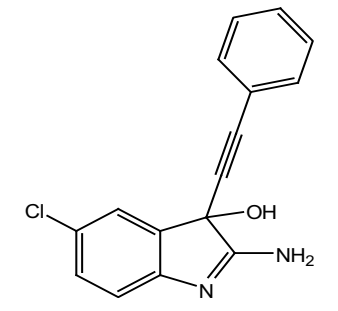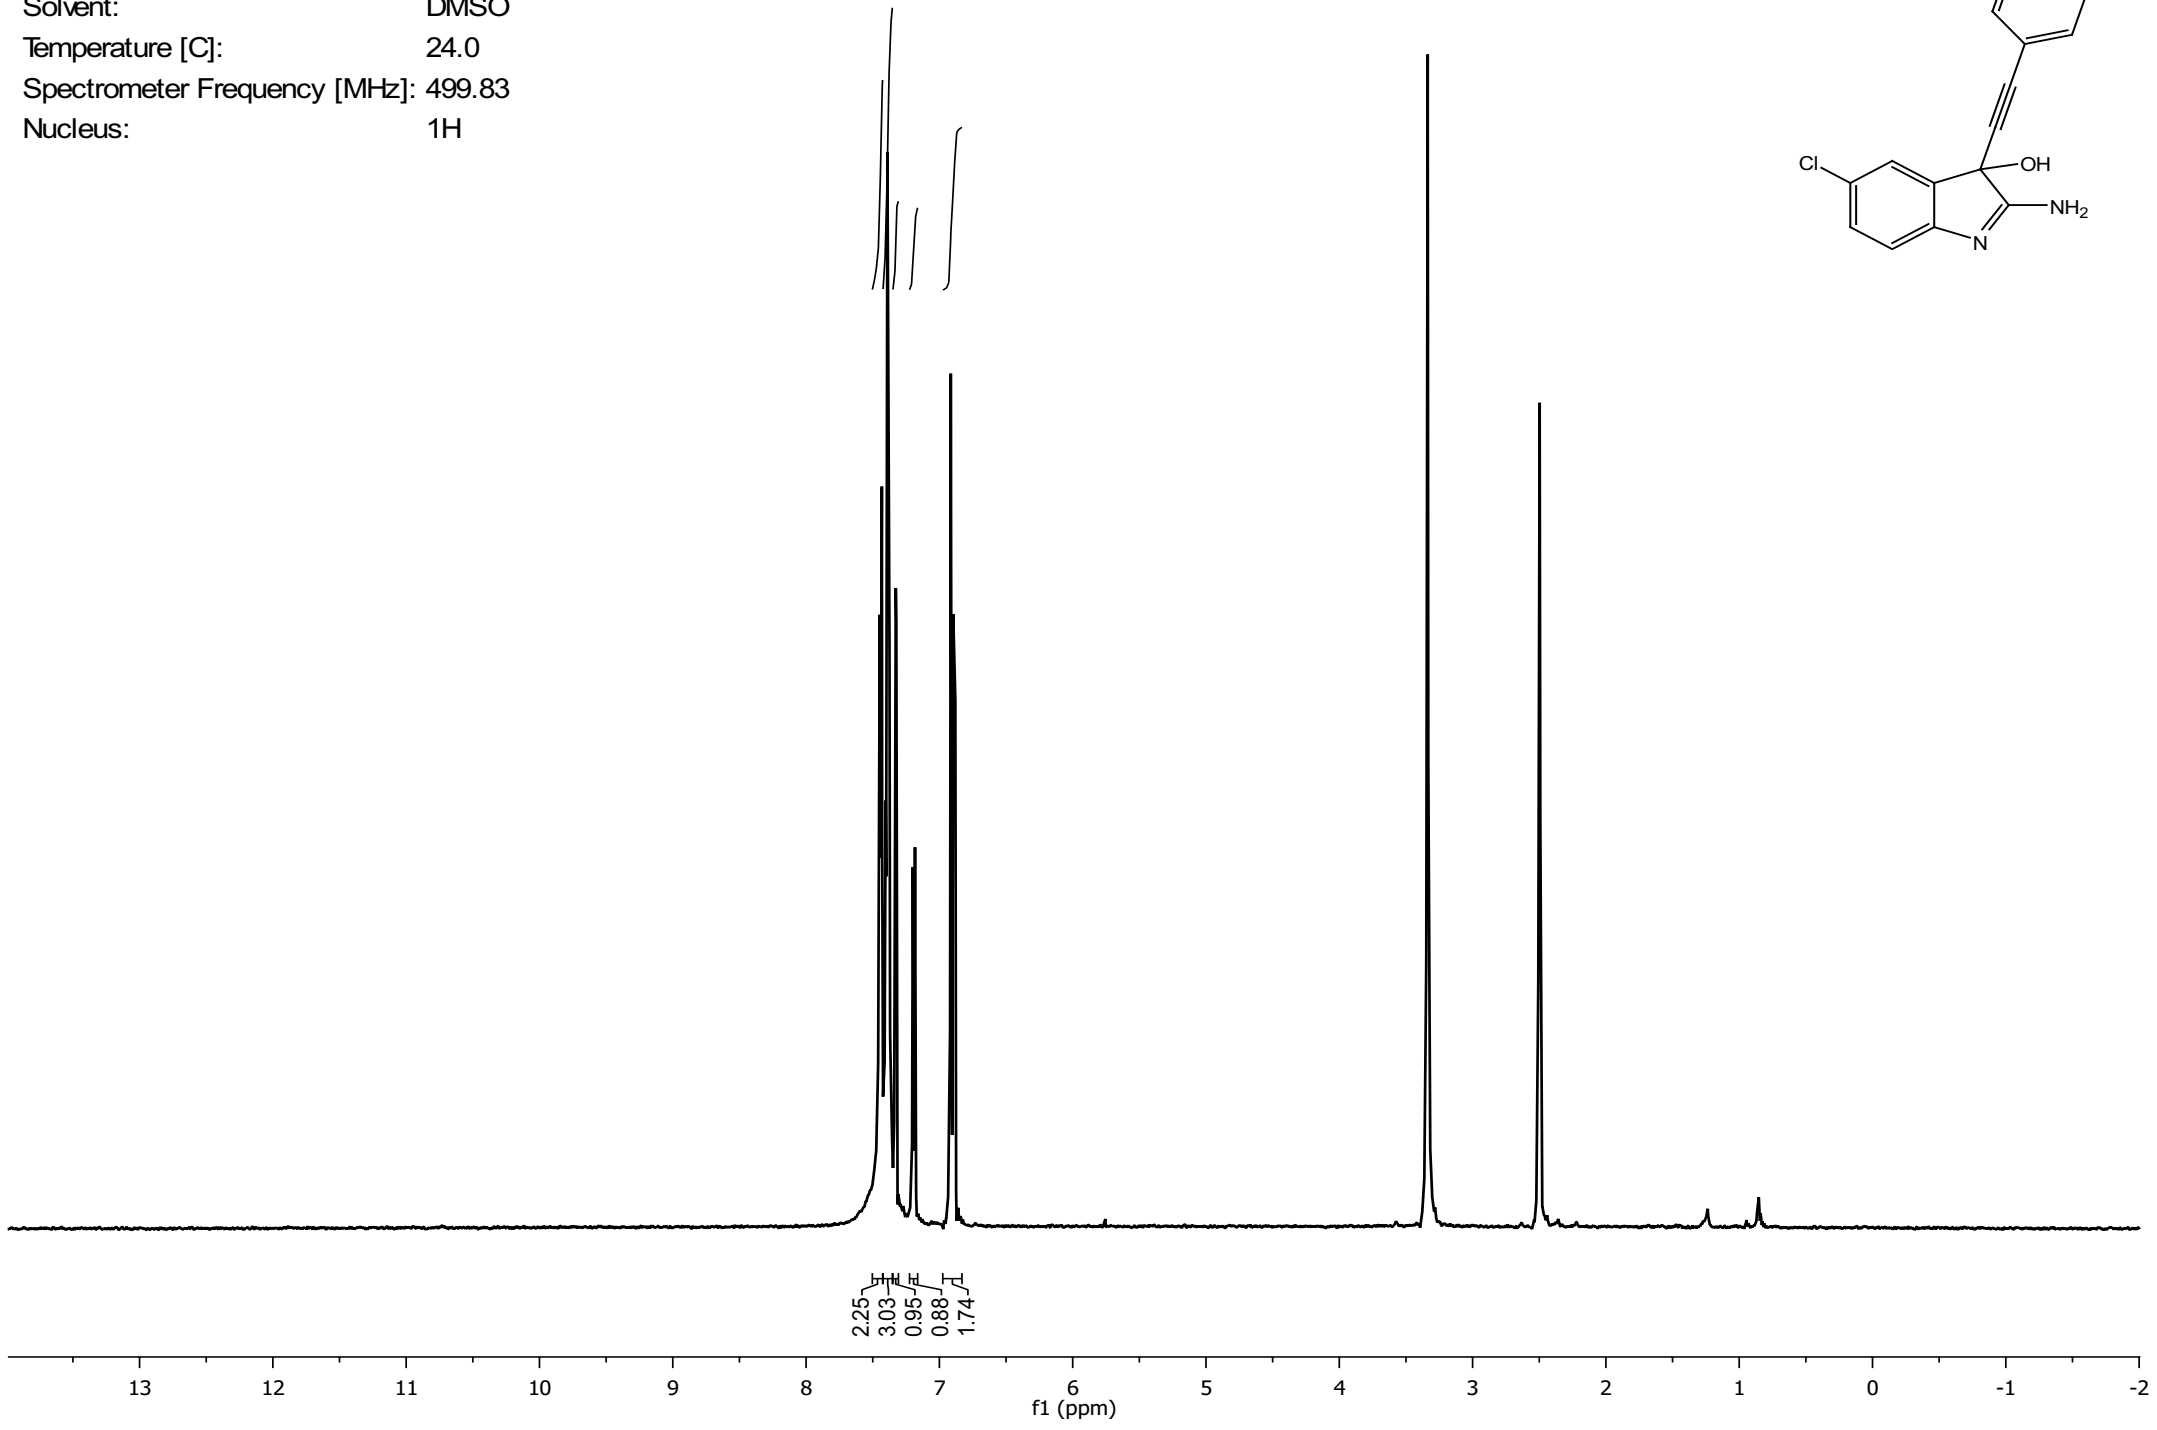

Parameter Value  
Solvent: DMSO  
Temperature [C]: 22.0  
Spectrometer Frequency [MHz]: 125.69  
Nucleus: <sup>13</sup>C

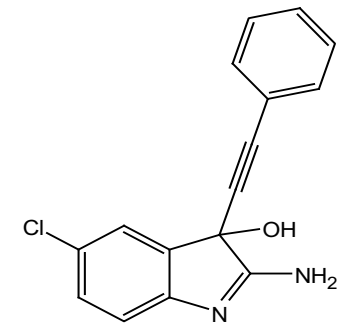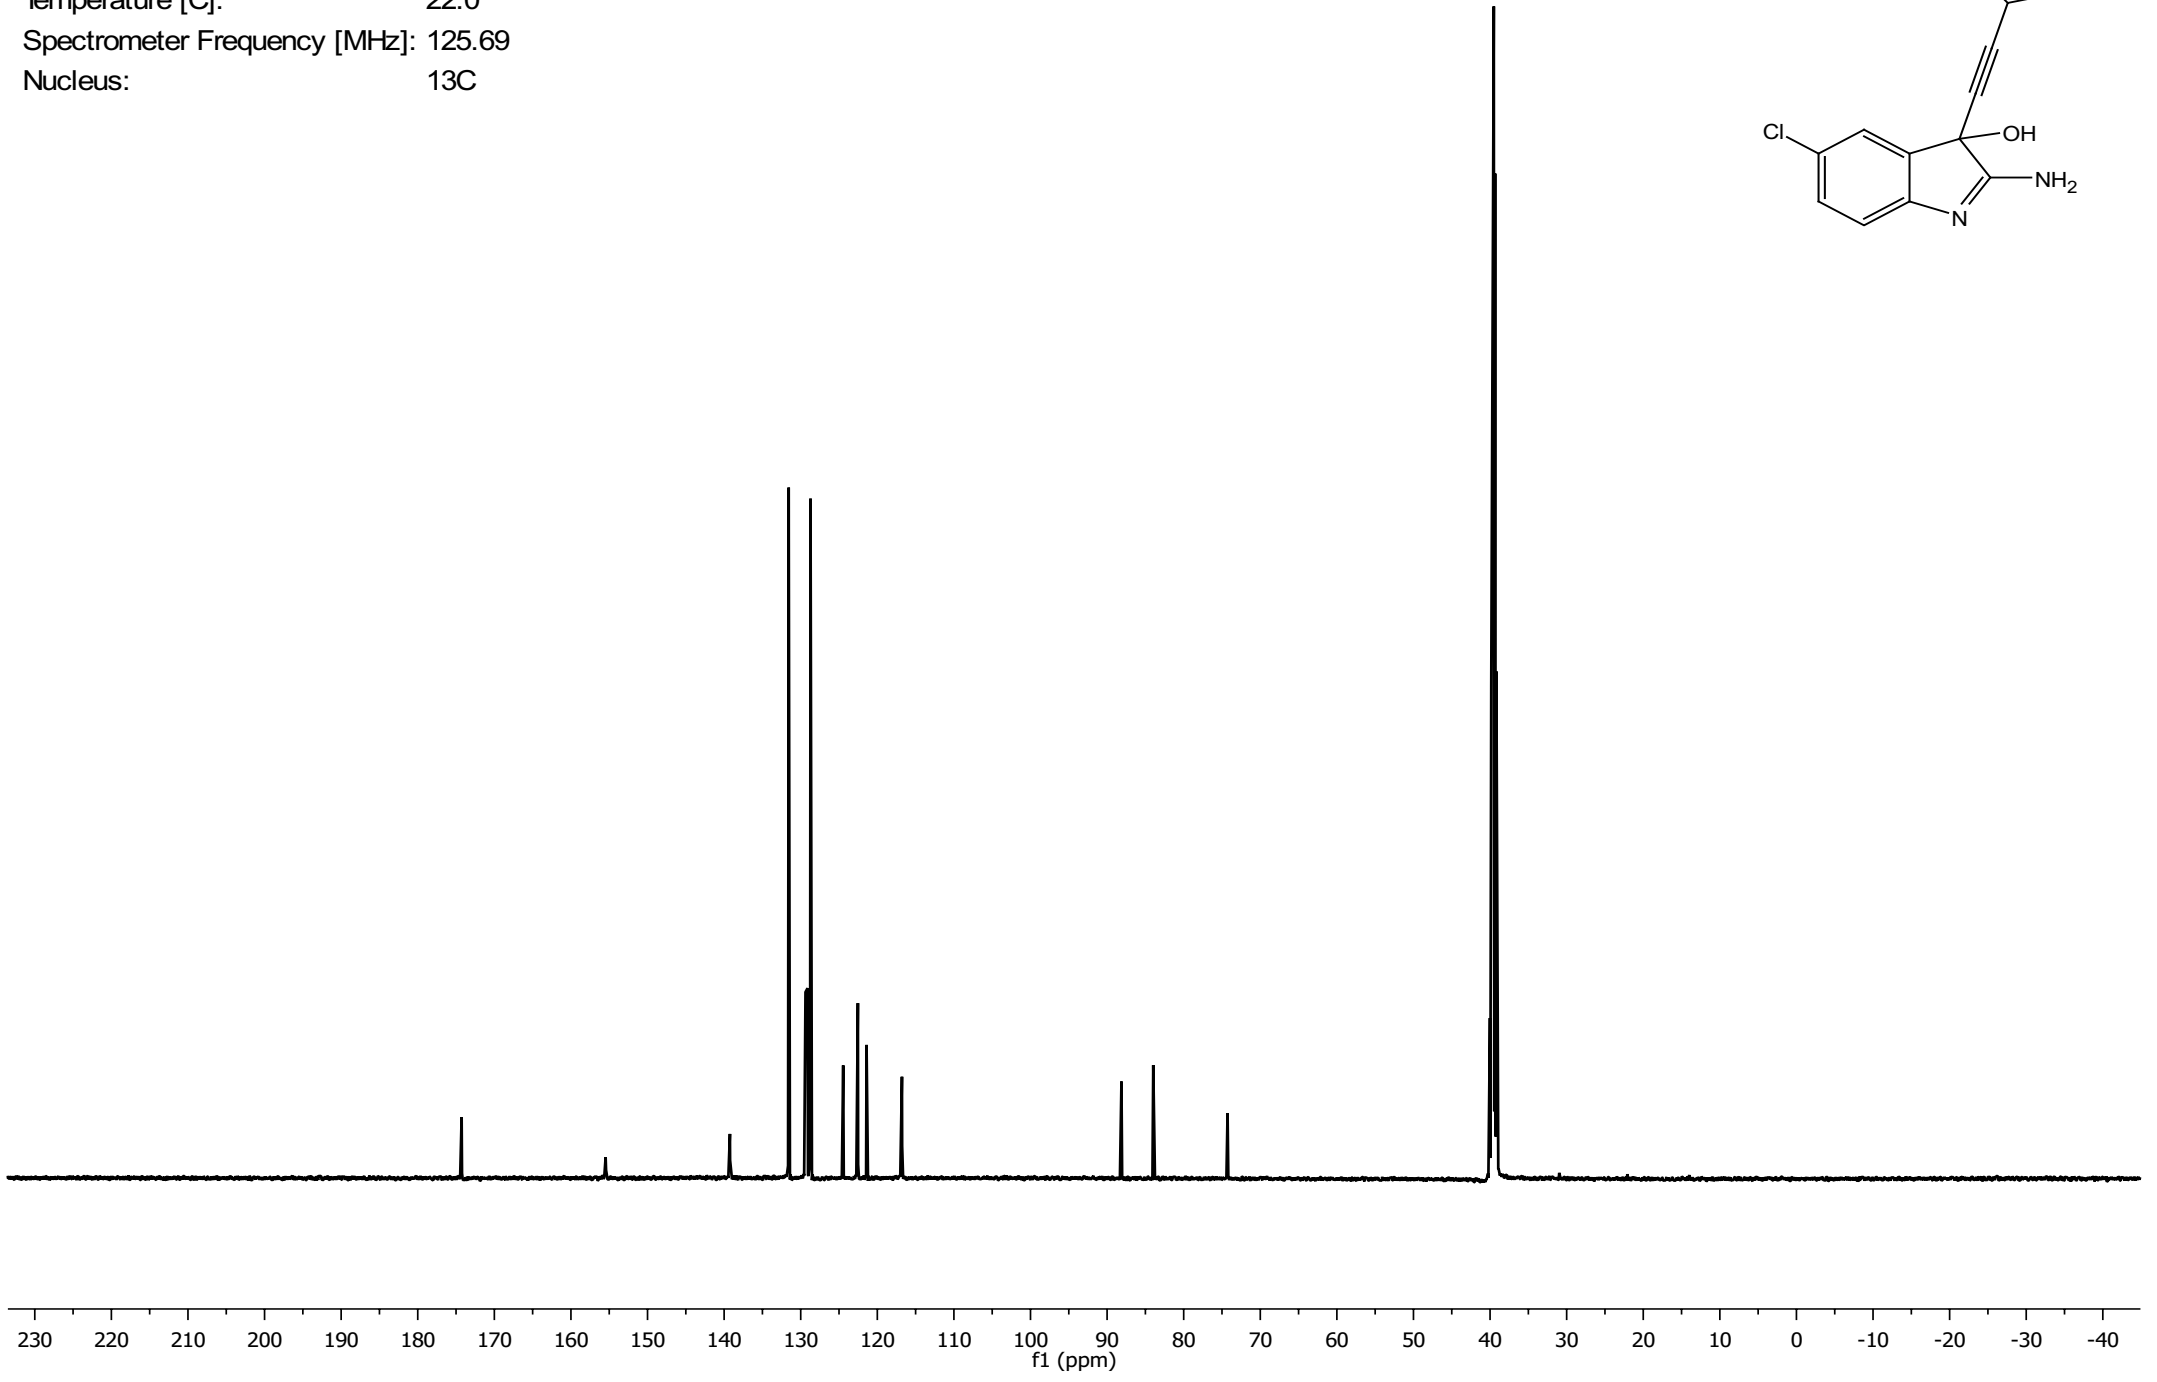



Parameter Value  
Solvent: DMSO  
Temperature [C]: 24.0  
Spectrometer Frequency [MHz]: 499.83  
Nucleus: 1H

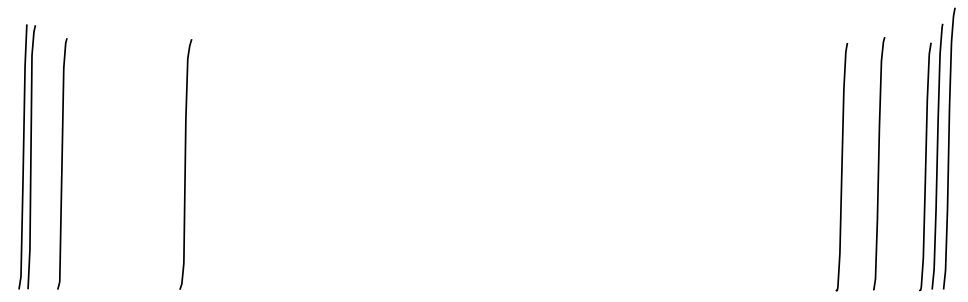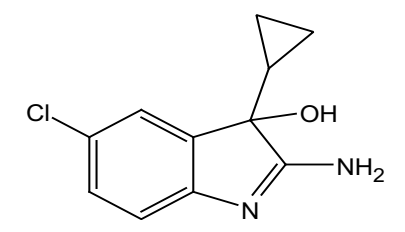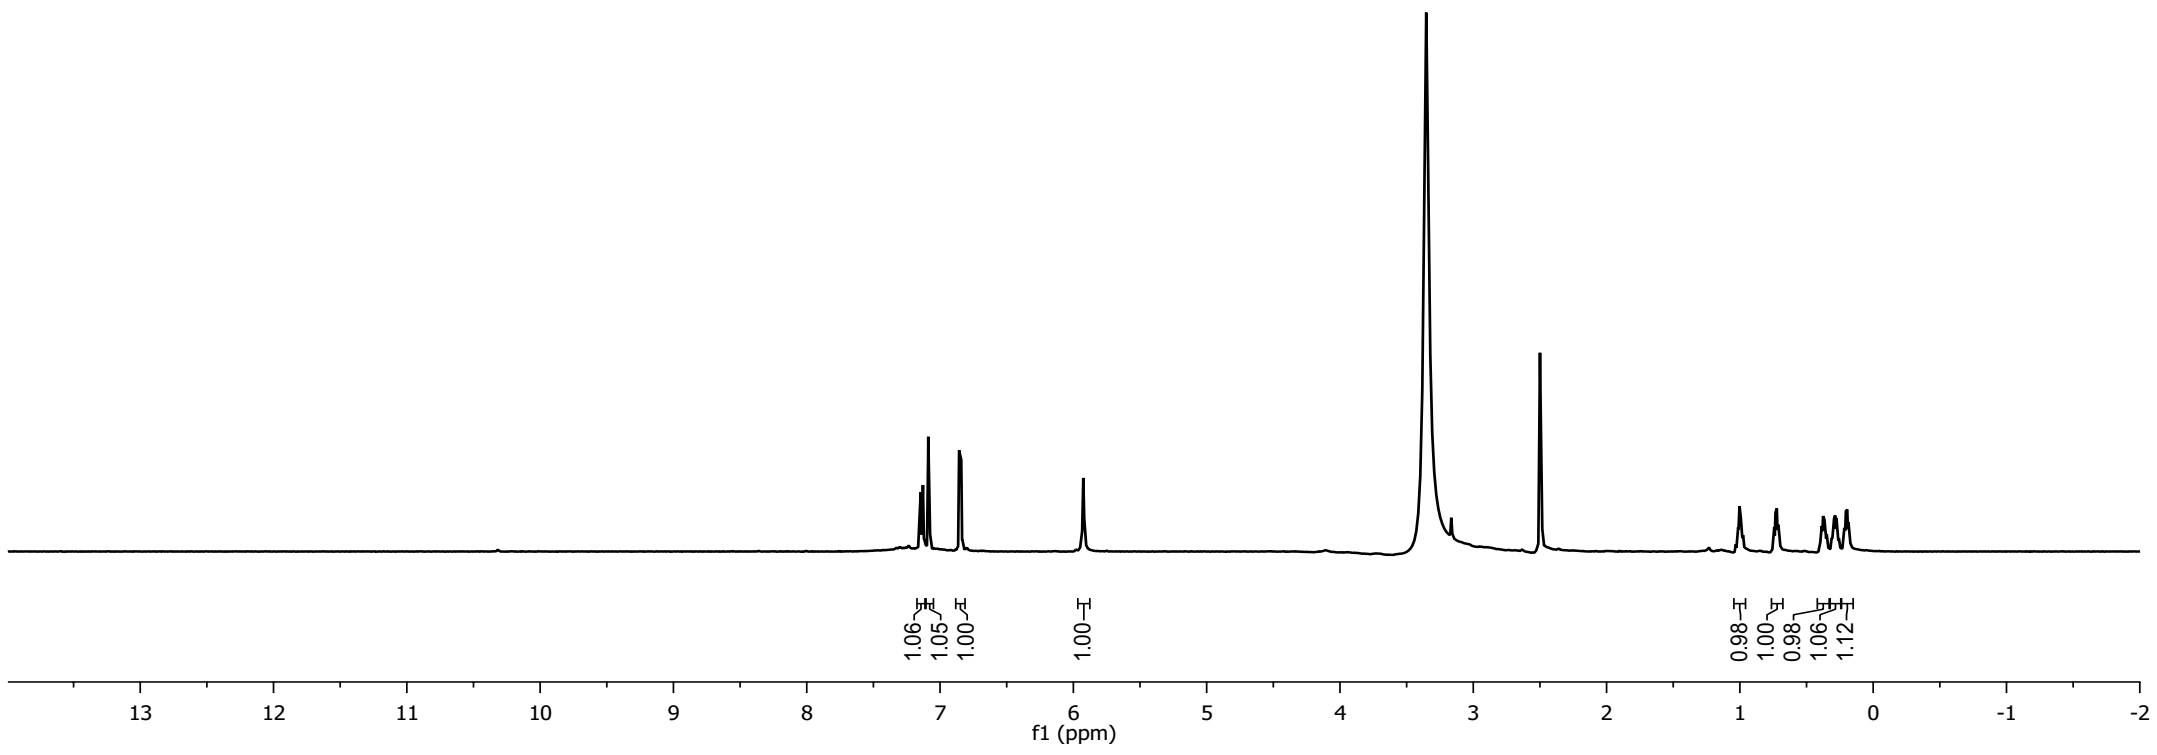

Parameter Value  
Solvent: DMSO  
Temperature [C]: 24.0  
Spectrometer Frequency [MHz]: 125.69  
Nucleus: 13C

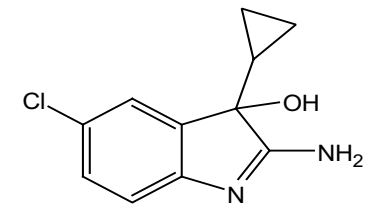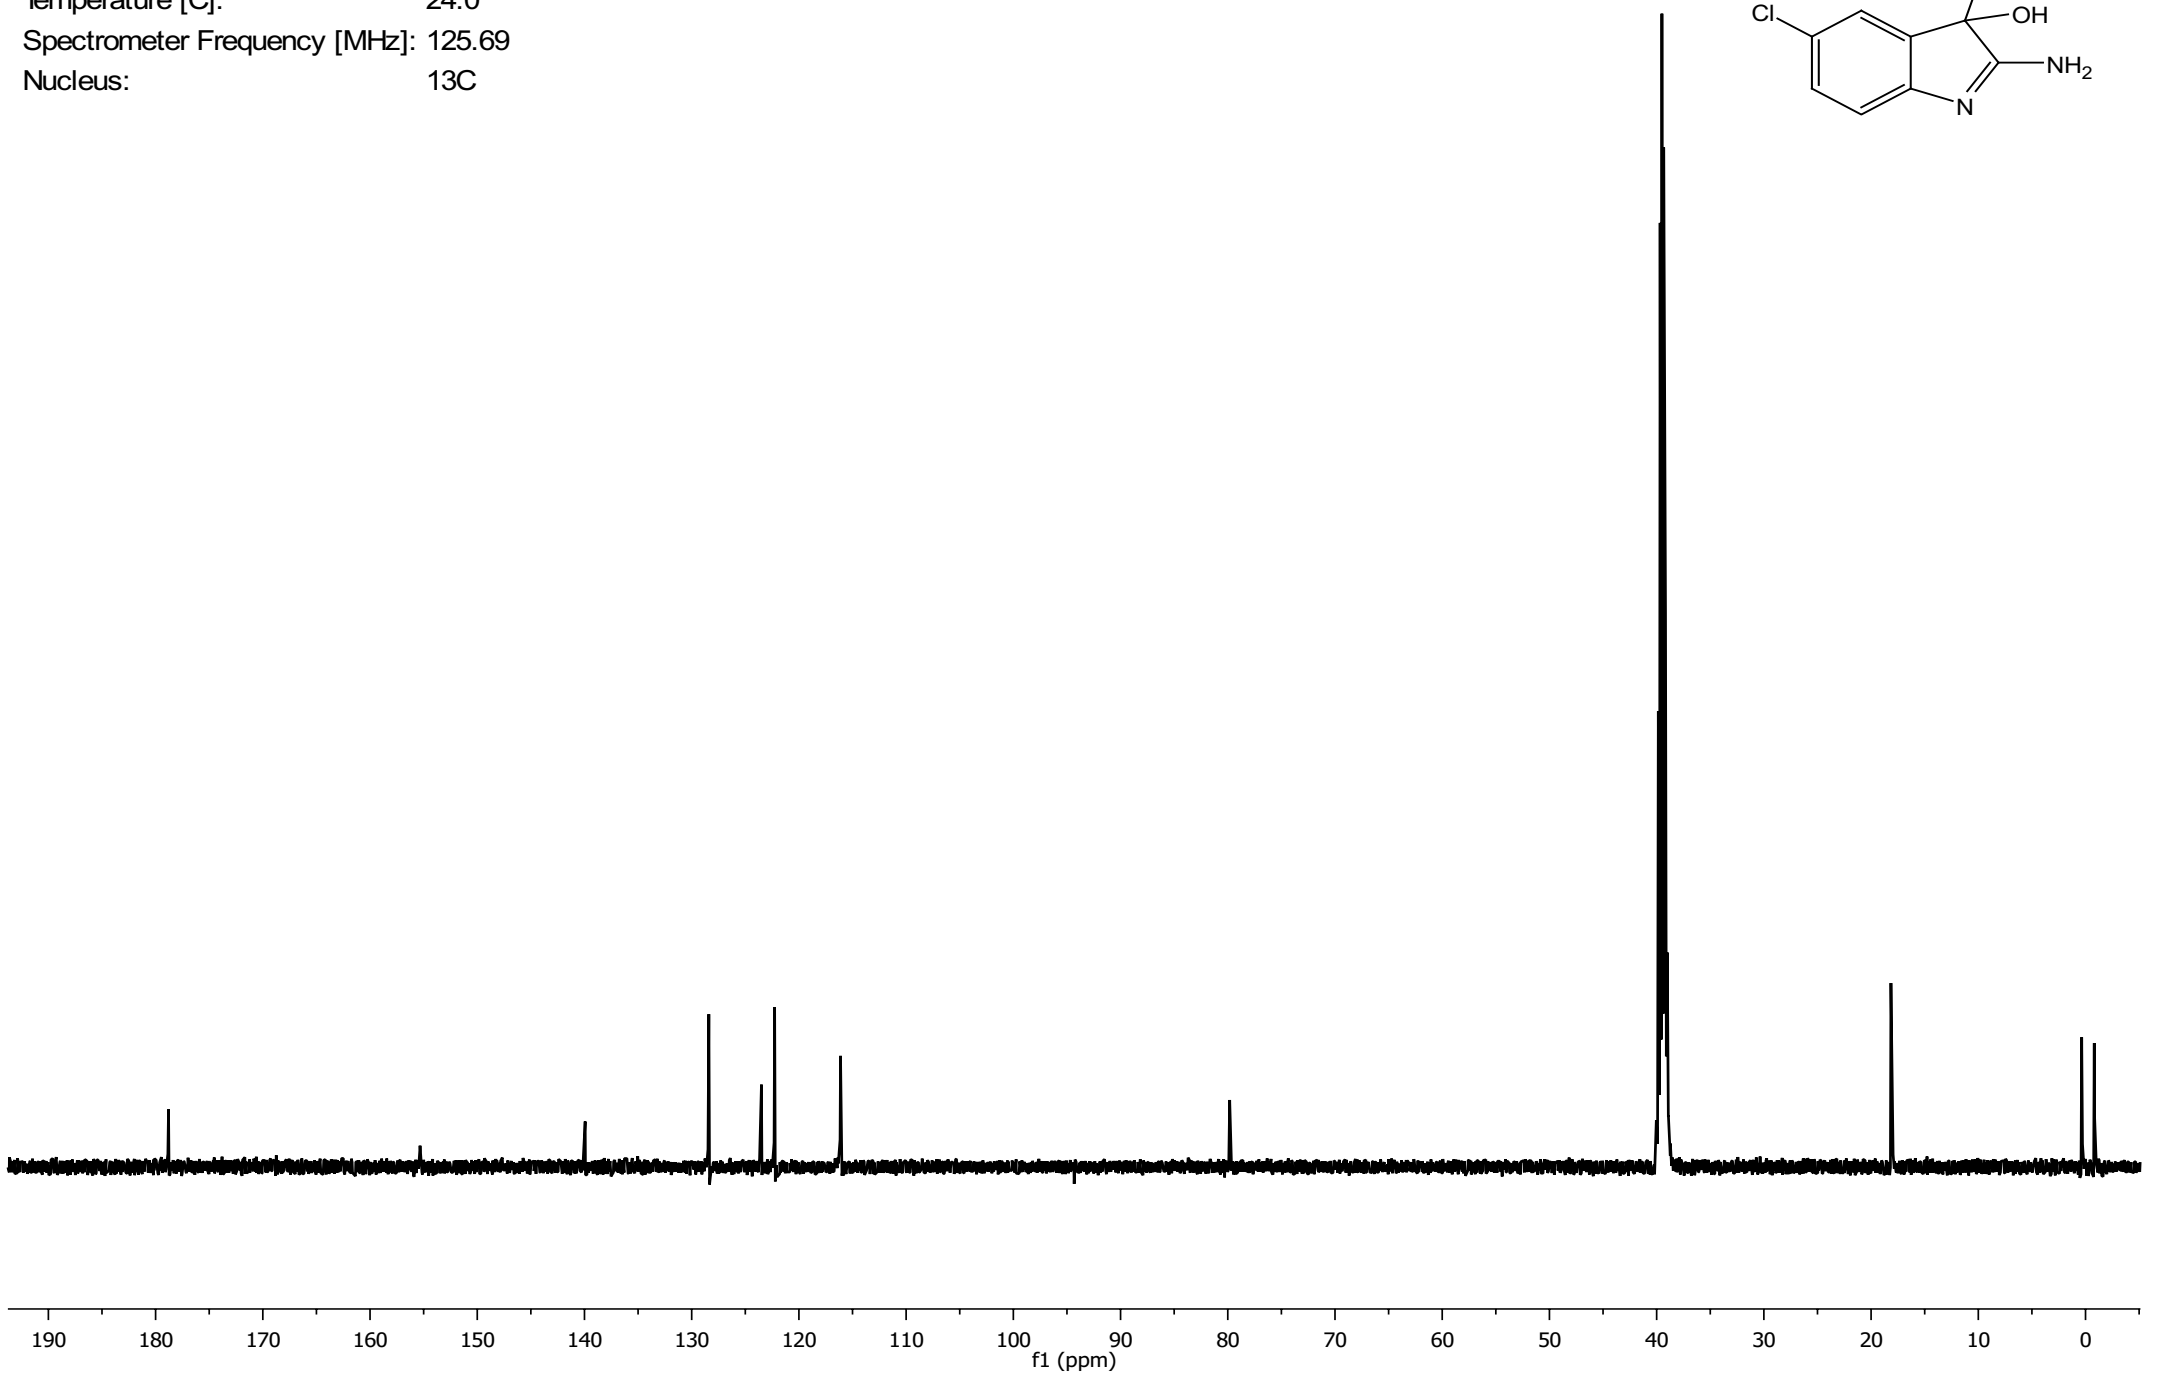

Parameter Value  
Solvent: DMSO  
Temperature [C]: 22.0  
Spectrometer Frequency [MHz]: 499.83  
Nucleus: 1H

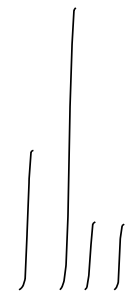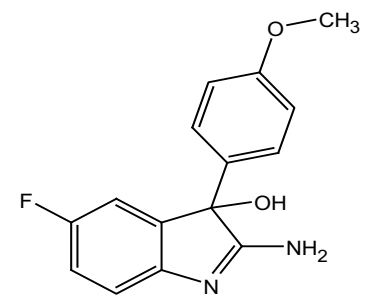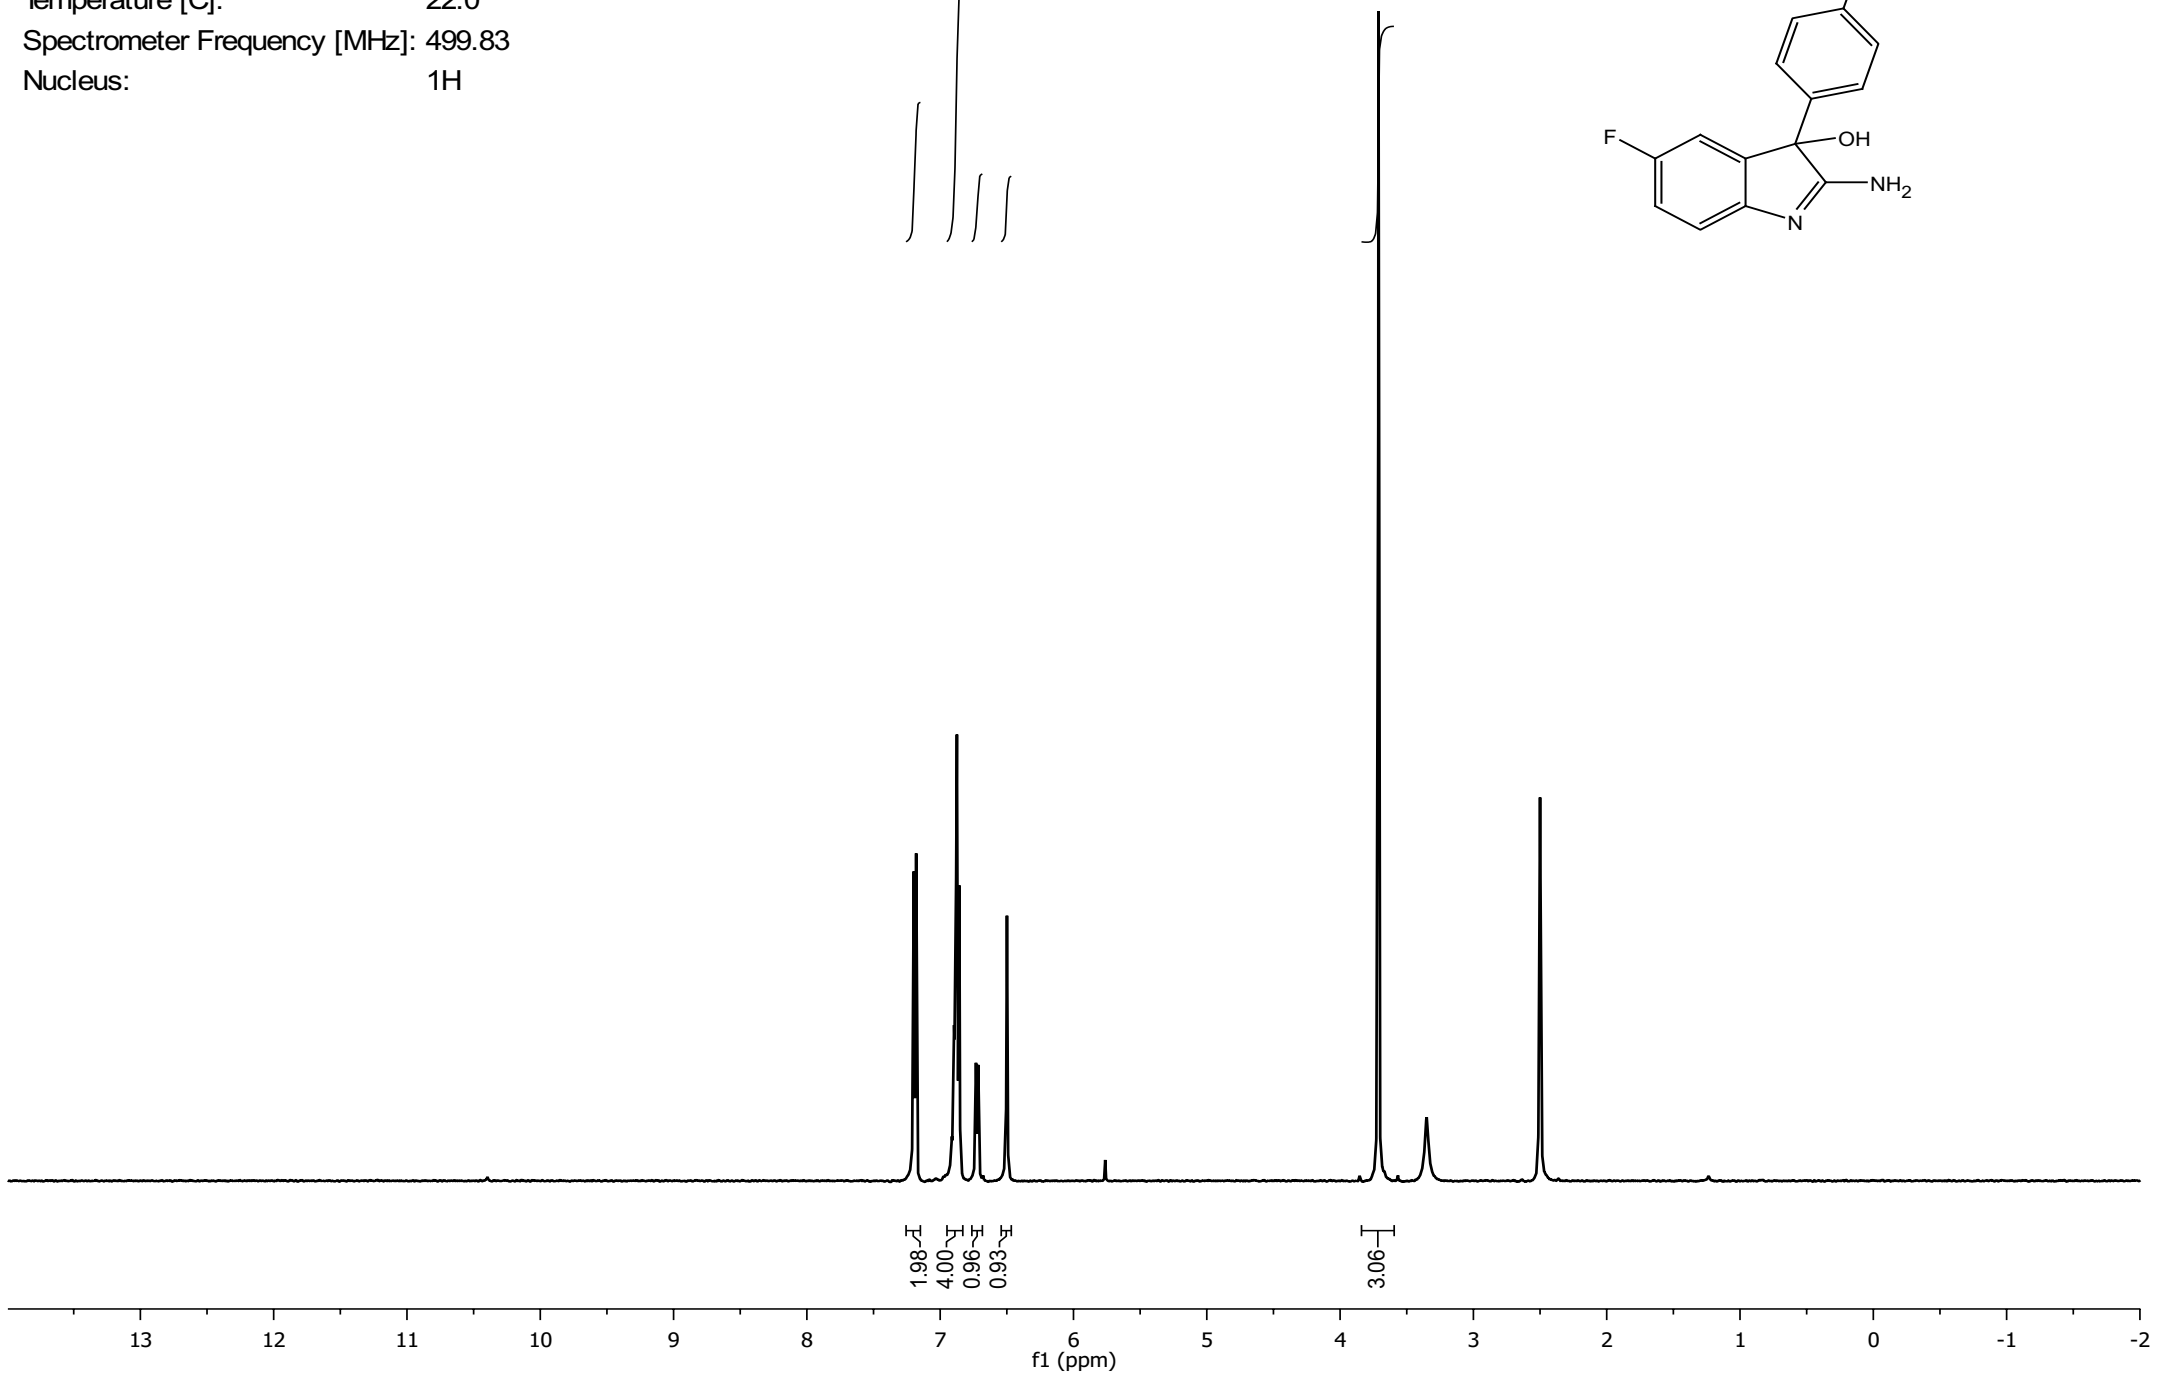

Parameter Value  
Solvent: DMSO  
Temperature [C]: 22.0  
Spectrometer Frequency [MHz]: 125.69  
Nucleus: <sup>13</sup>C

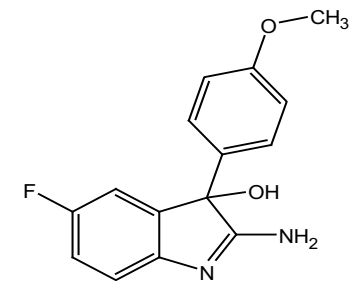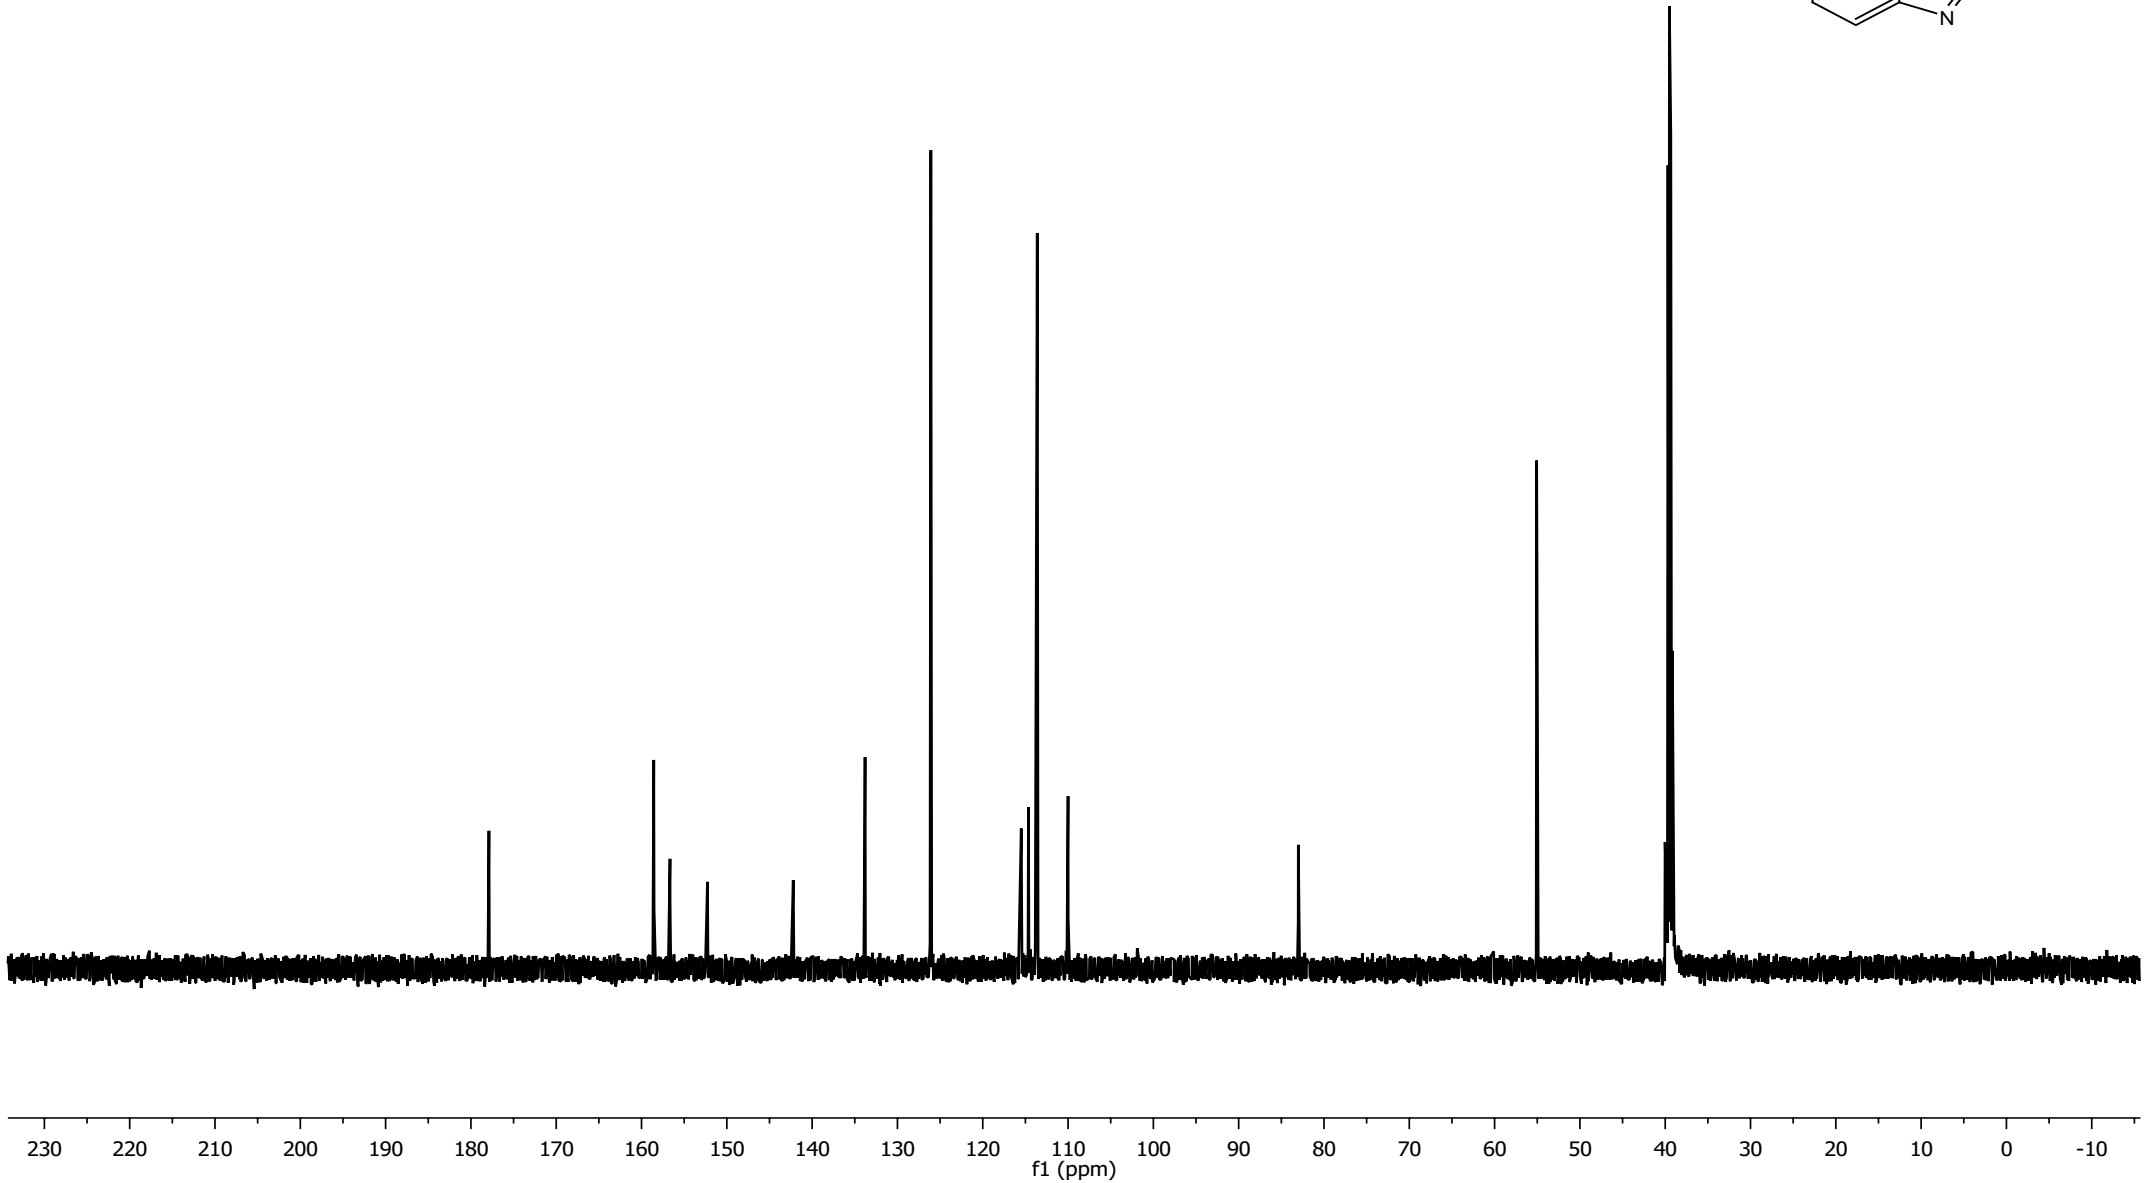

Parameter Value  
Solvent: DMSO  
Temperature [C]: 24.0  
Spectrometer Frequency [MHz]: 499.83  
Nucleus: 1H

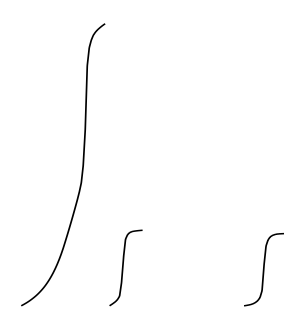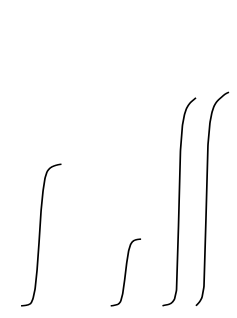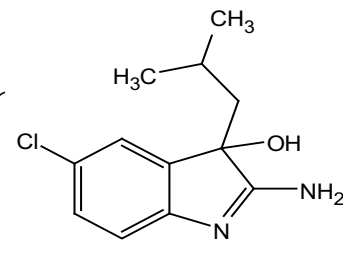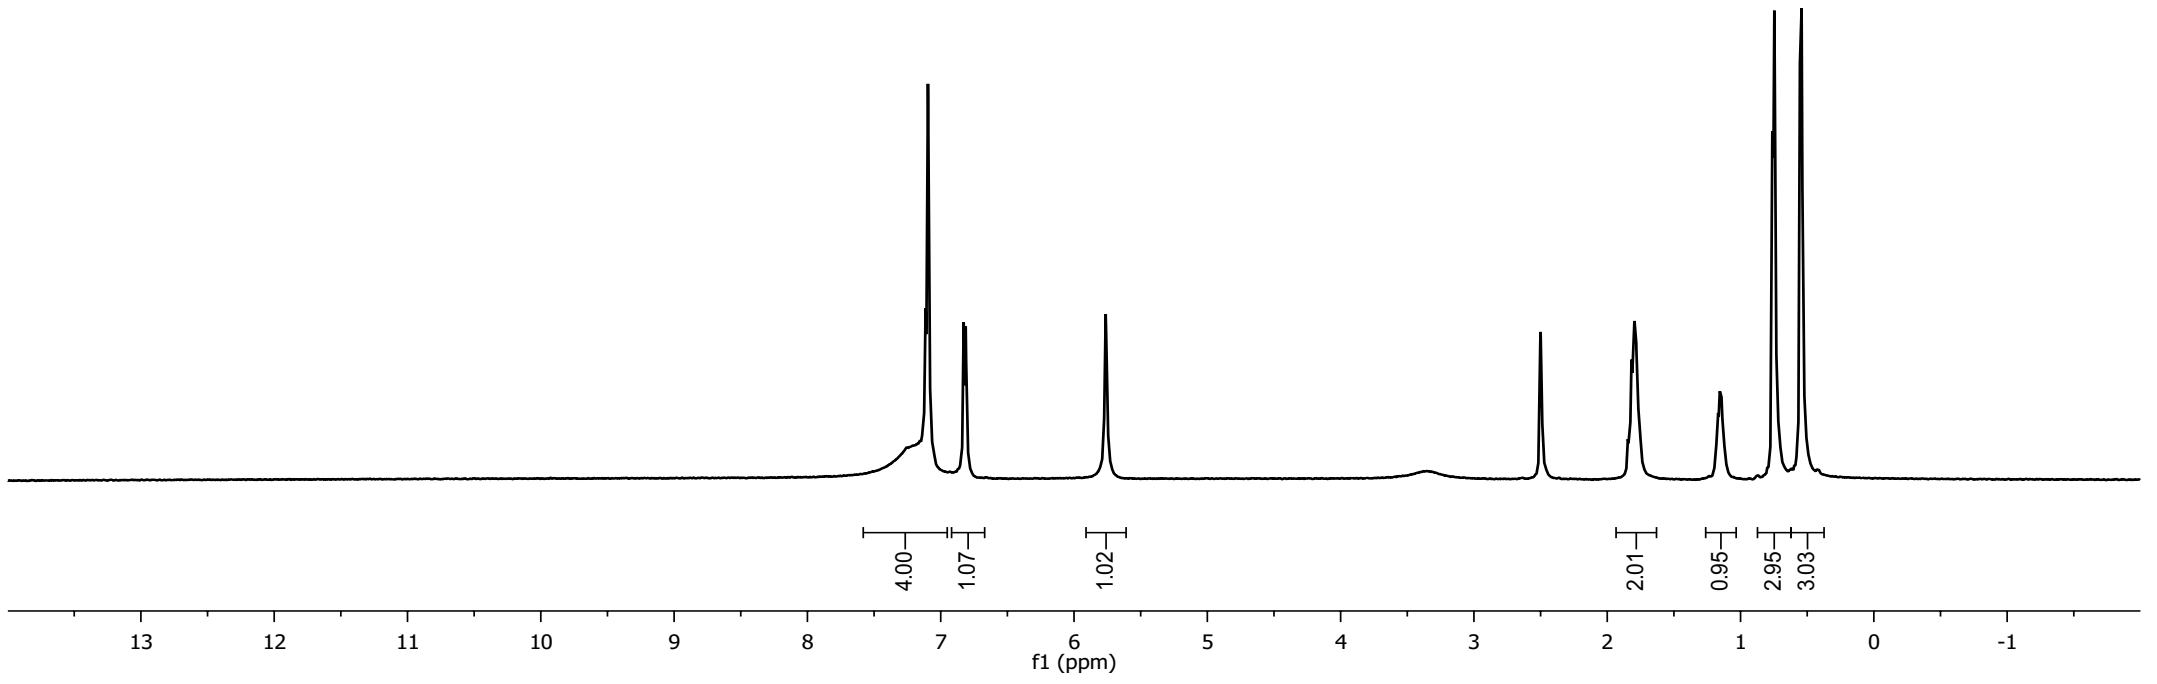

Parameter Value  
Solvent: DMSO  
Temperature [C]: 22.0  
Spectrometer Frequency [MHz]: 125.69  
Nucleus: <sup>13</sup>C

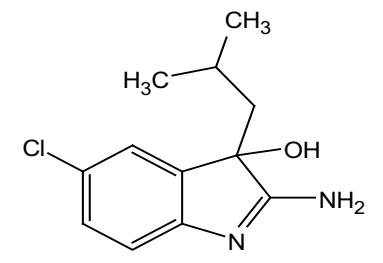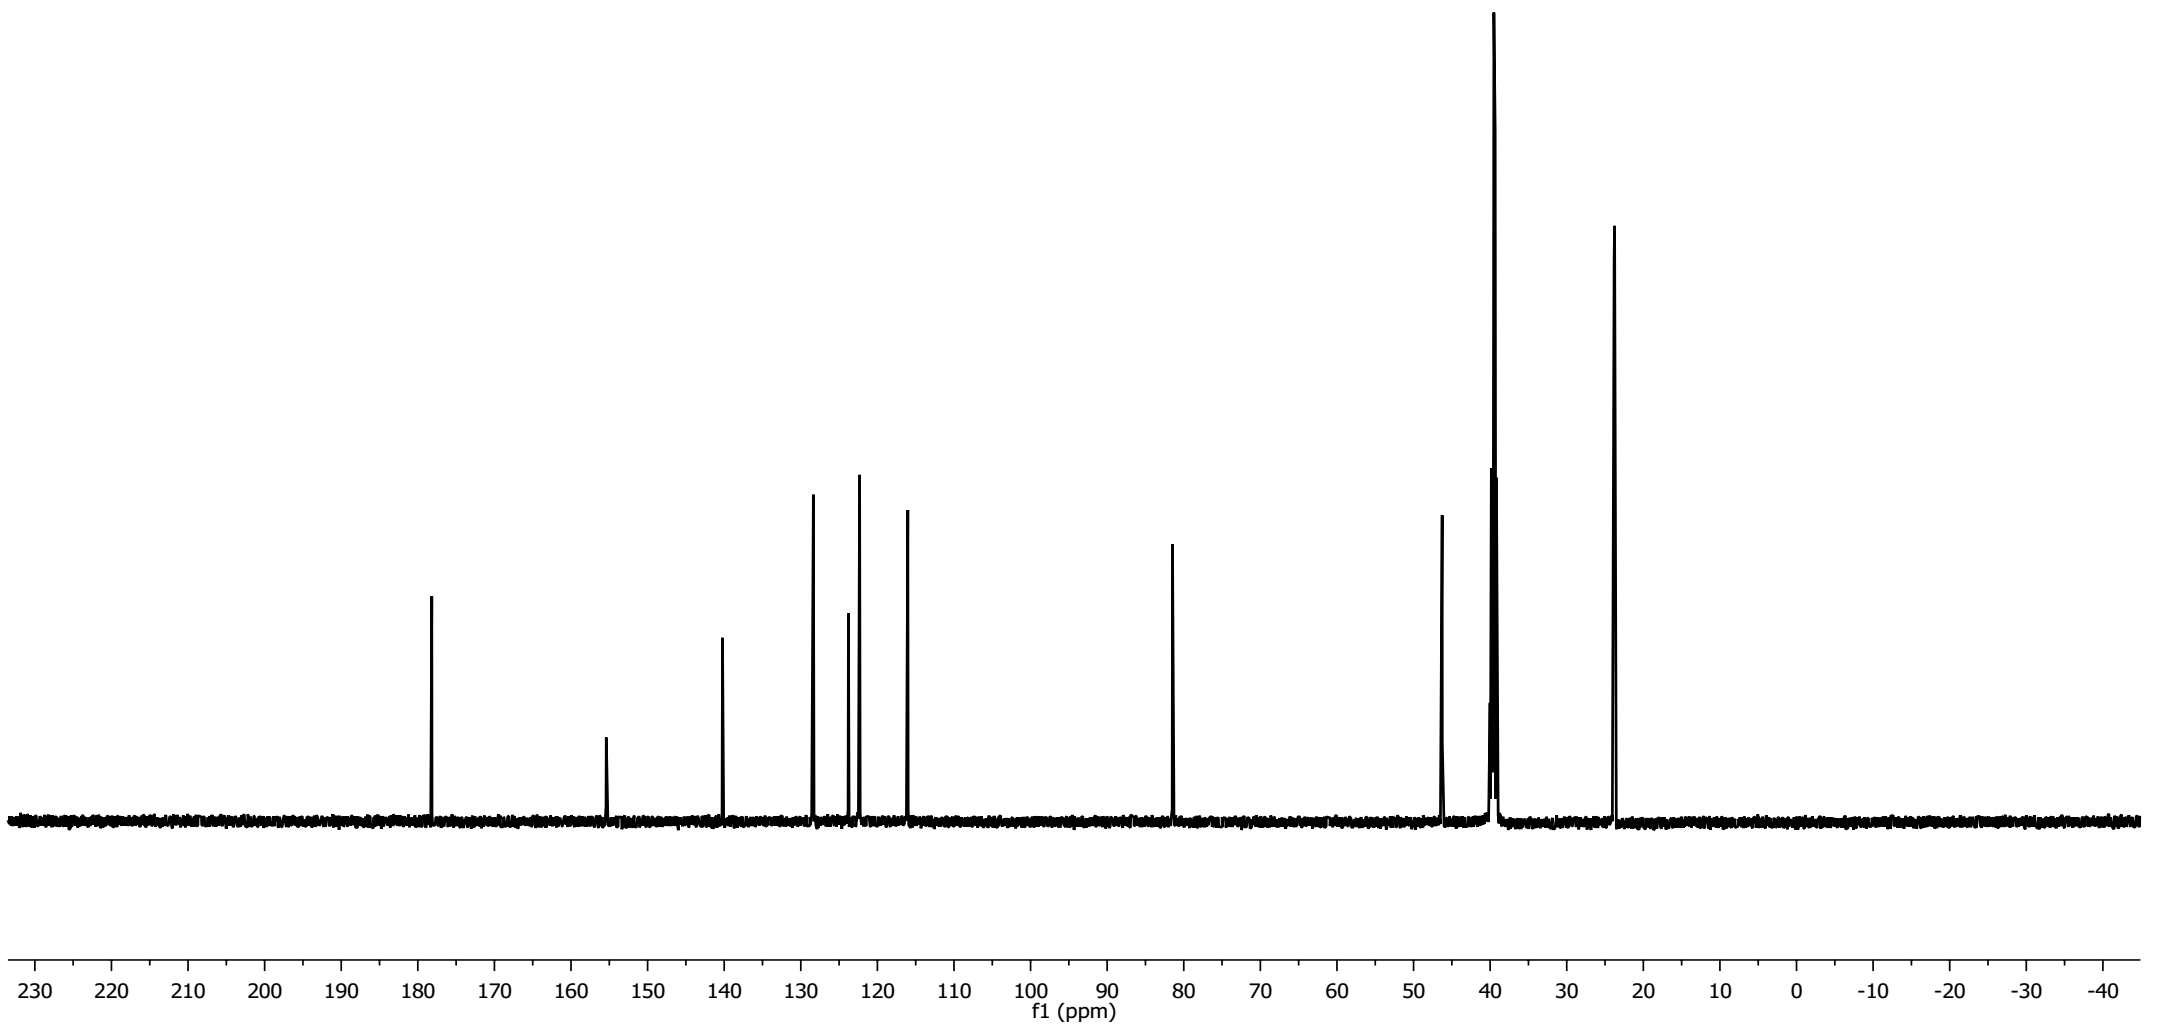

Parameter Value  
Solvent: DMSO  
Temperature [C]: 22.0  
Spectrometer Frequency [MHz]: 499.83  
Nucleus: 1H

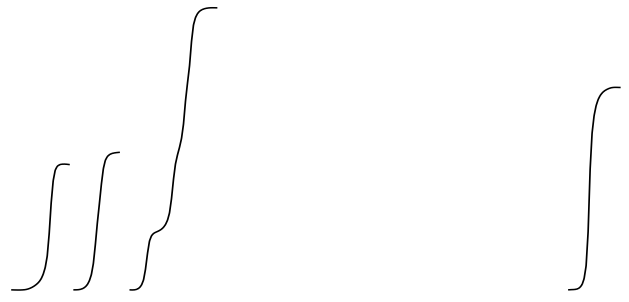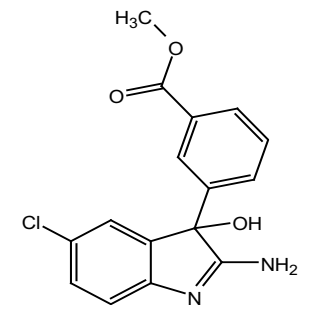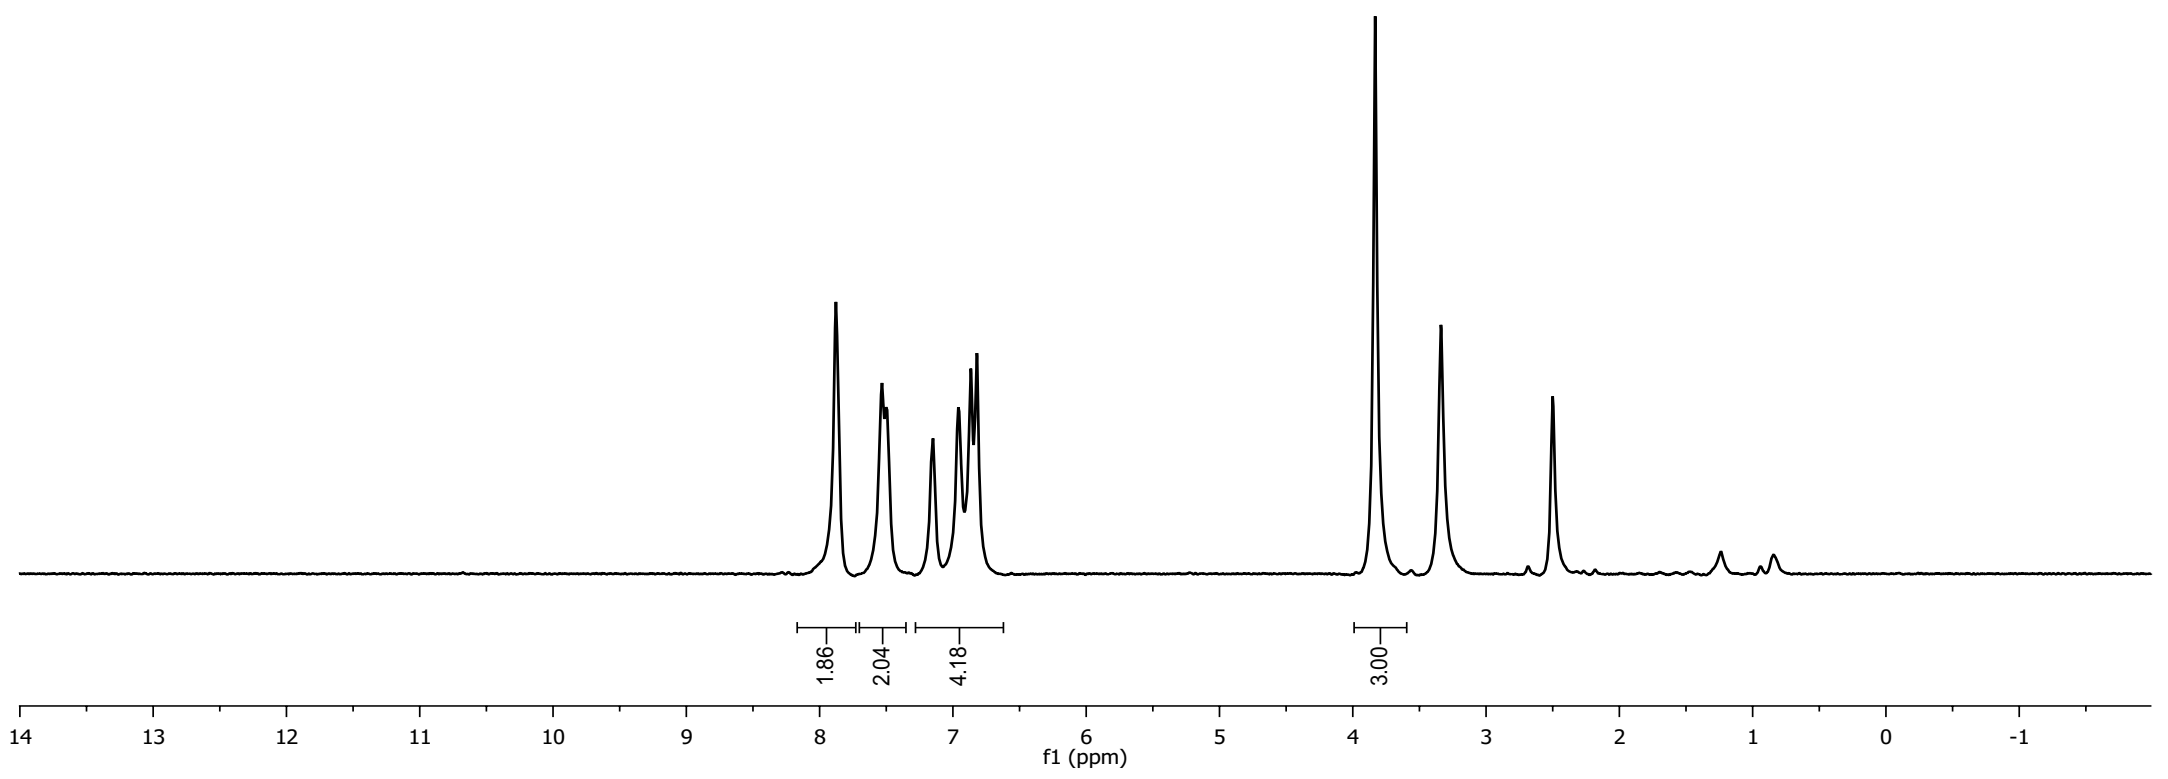

| Parameter                     | Value           |
|-------------------------------|-----------------|
| Solvent:                      | DMSO            |
| Temperature [C]:              | 22.0            |
| Spectrometer Frequency [MHz]: | 125.69          |
| Nucleus:                      | <sup>13</sup> C |

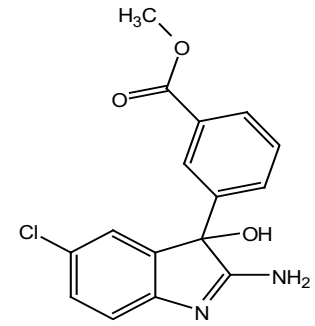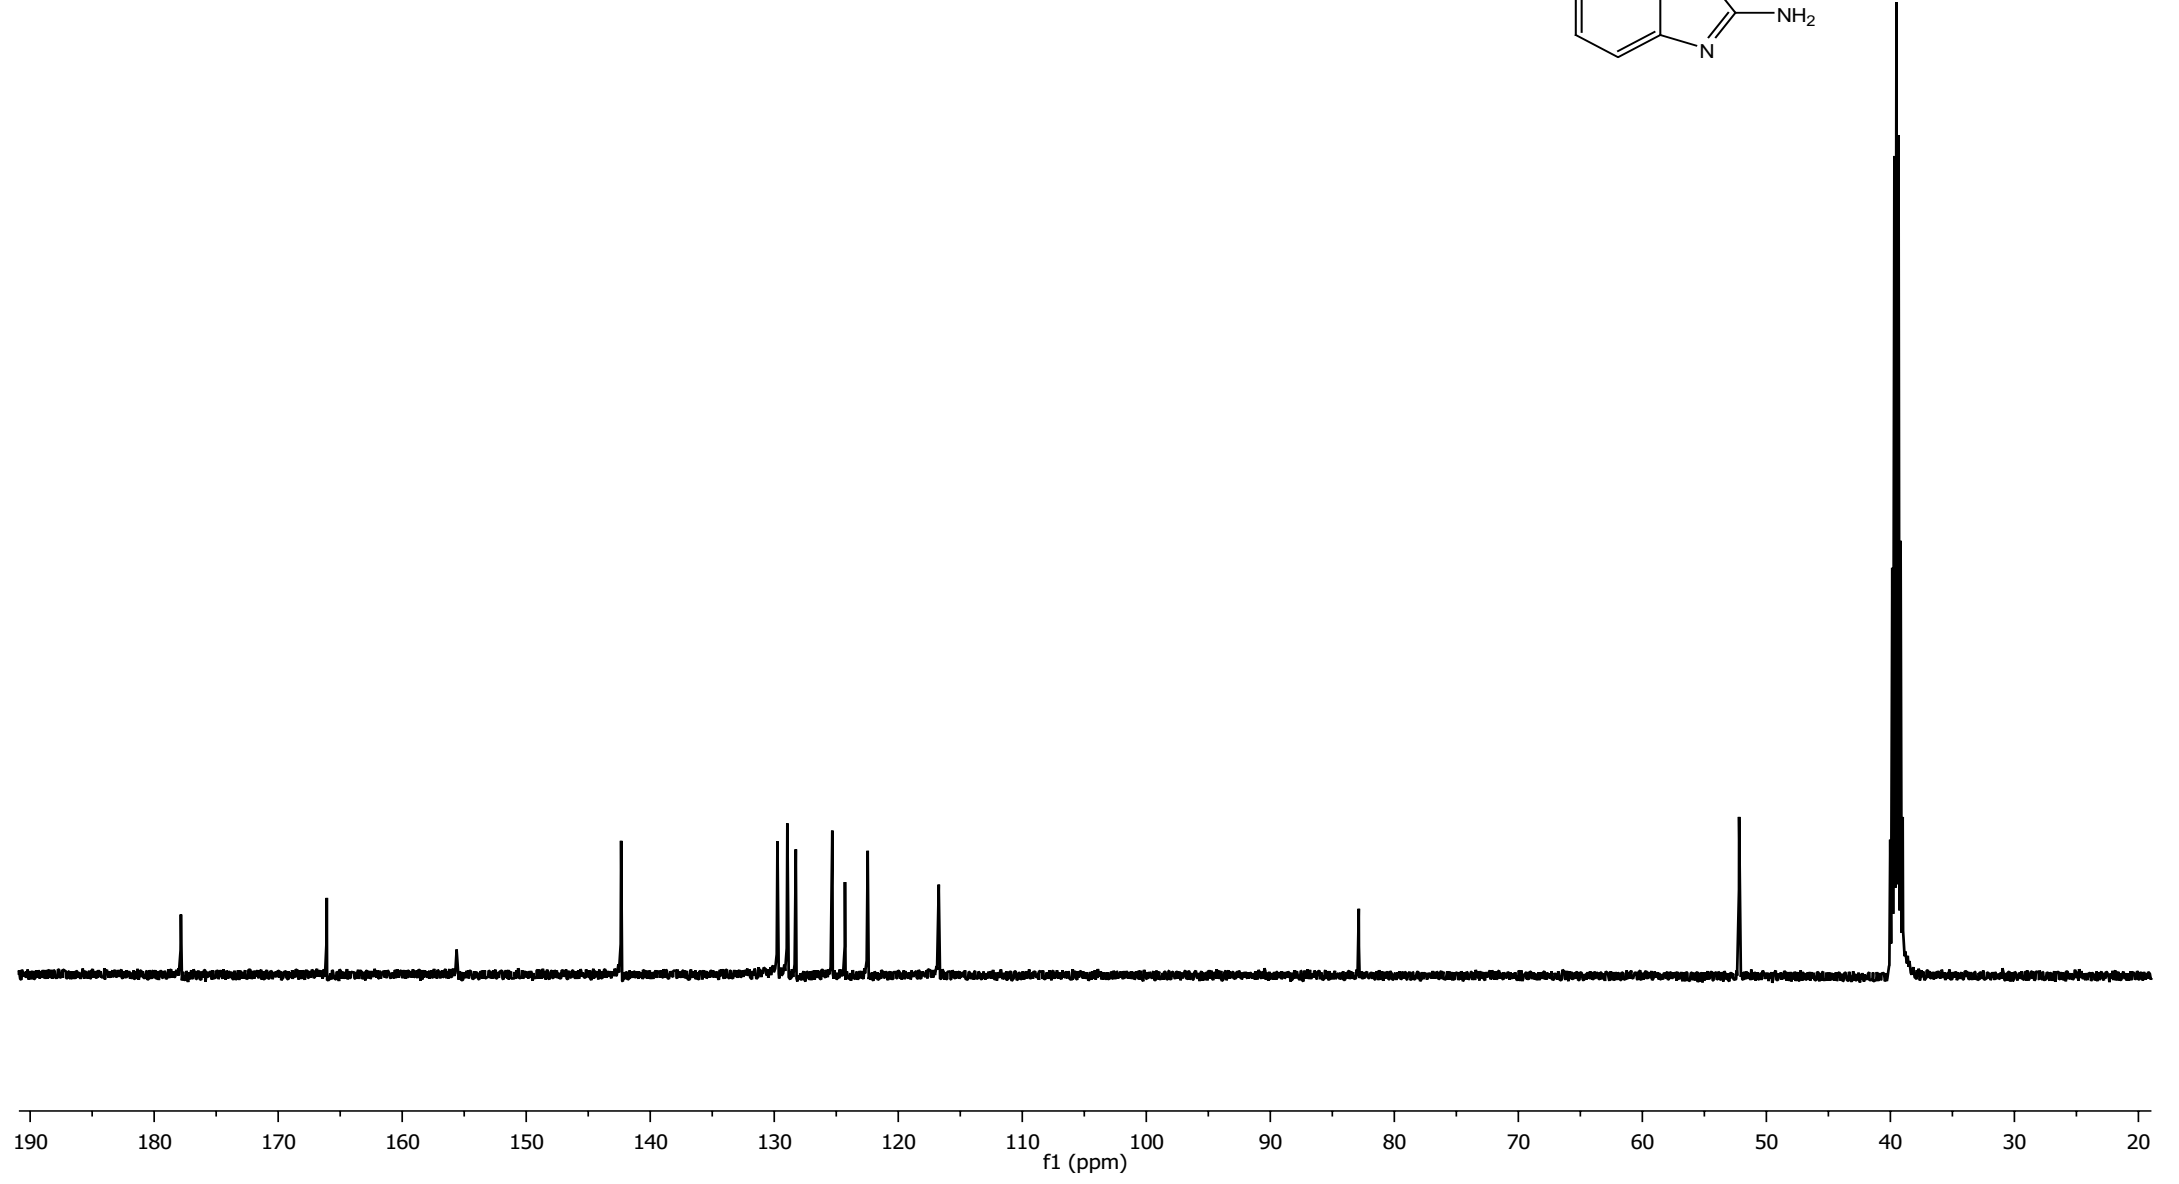



Parameter Value  
Solvent: DMSO  
Temperature [K]: 300.0  
Nucleus: <sup>1</sup>H  
Spectrometer Frequency [MHz]: 300.13

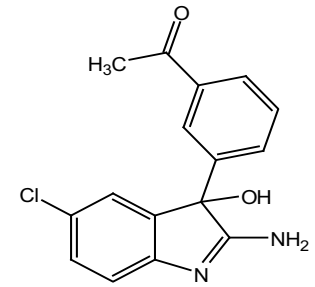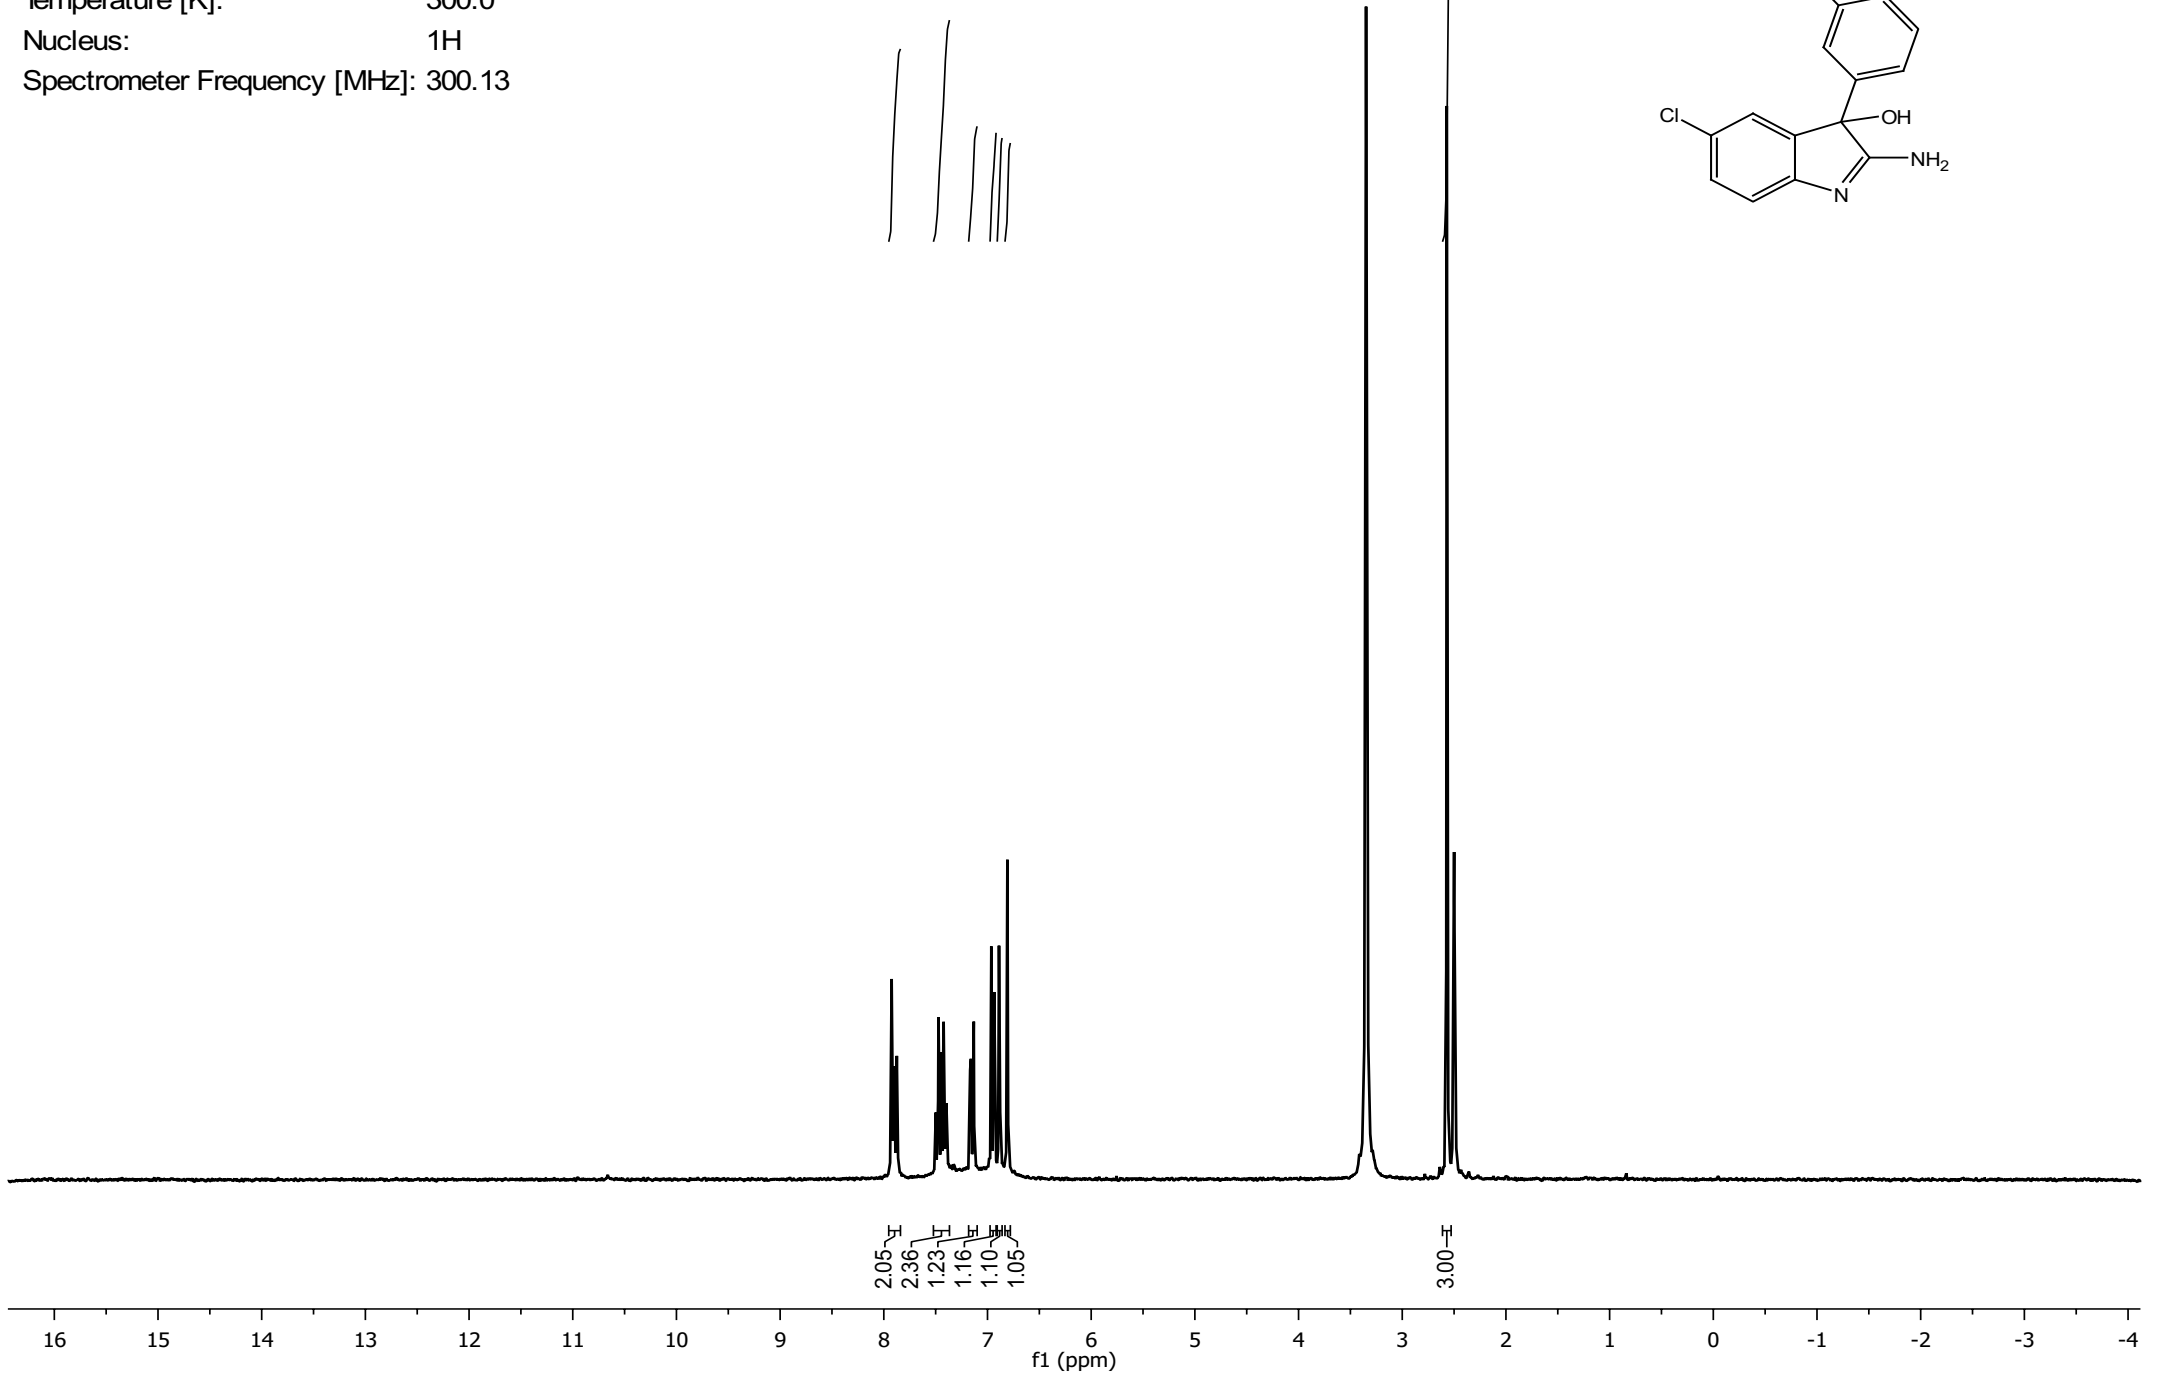

Parameter Value  
Solvent: DMSO  
Temperature [K]: 300.0  
Nucleus: <sup>13</sup>C  
Spectrometer Frequency [MHz]: 75.47

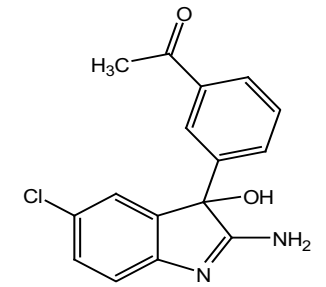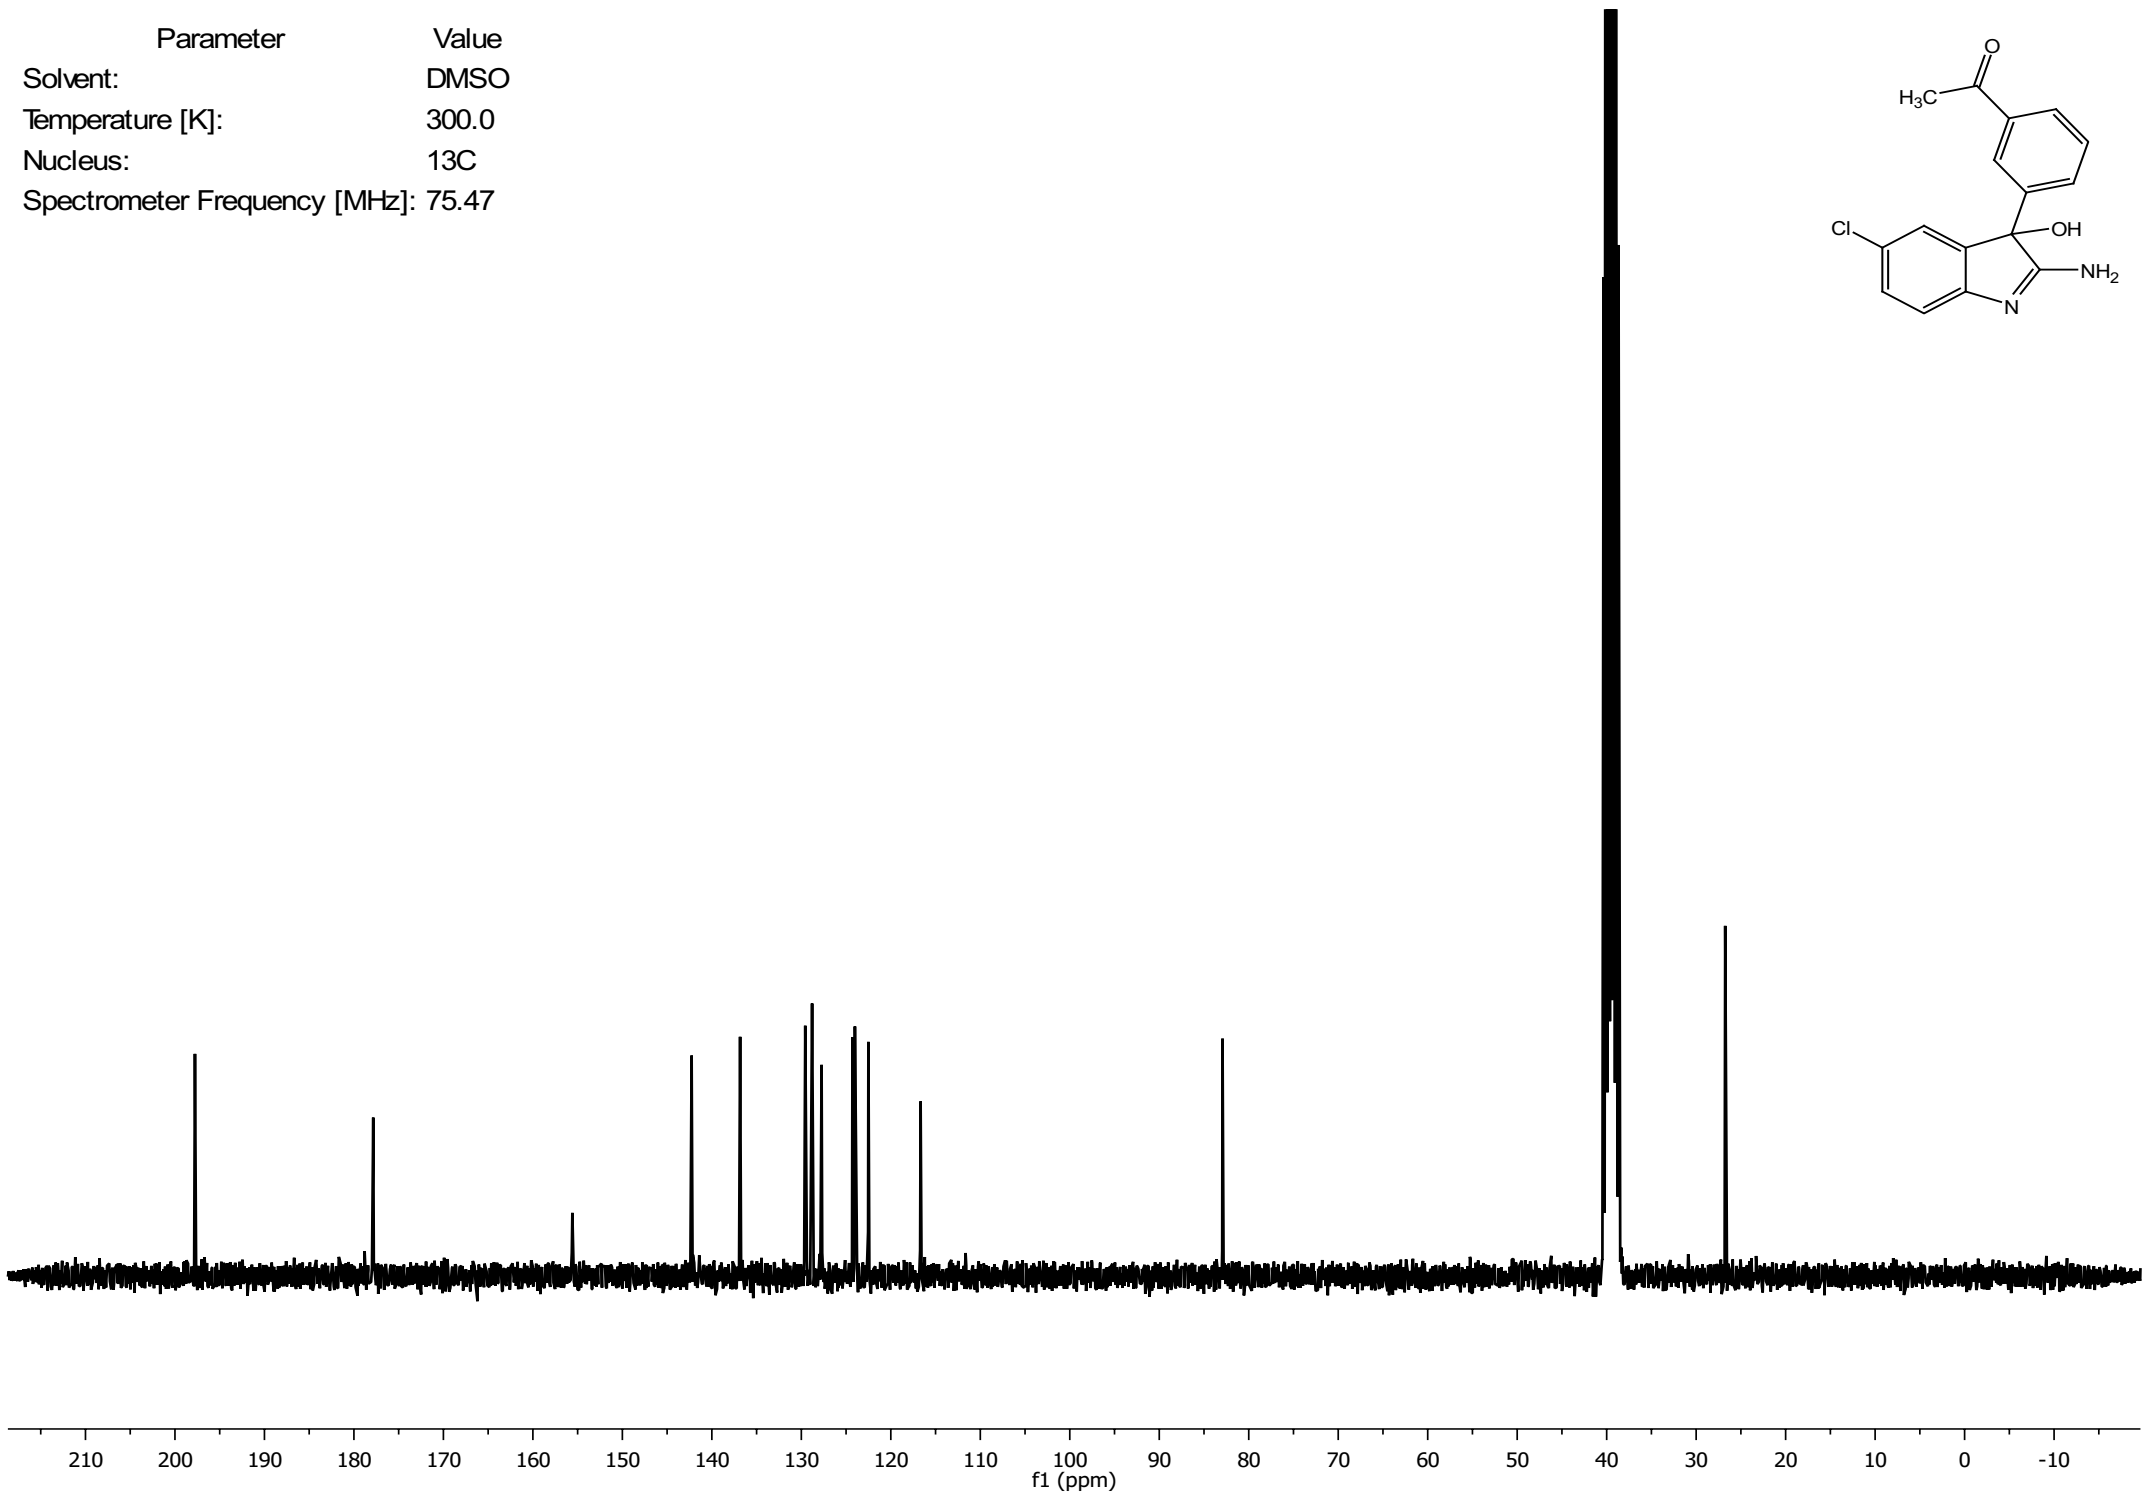

Parameter Value  
Solvent: DMSO  
Temperature [C]: 24.0  
Spectrometer Frequency [MHz]: 499.83  
Nucleus: 1H

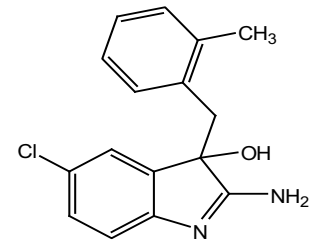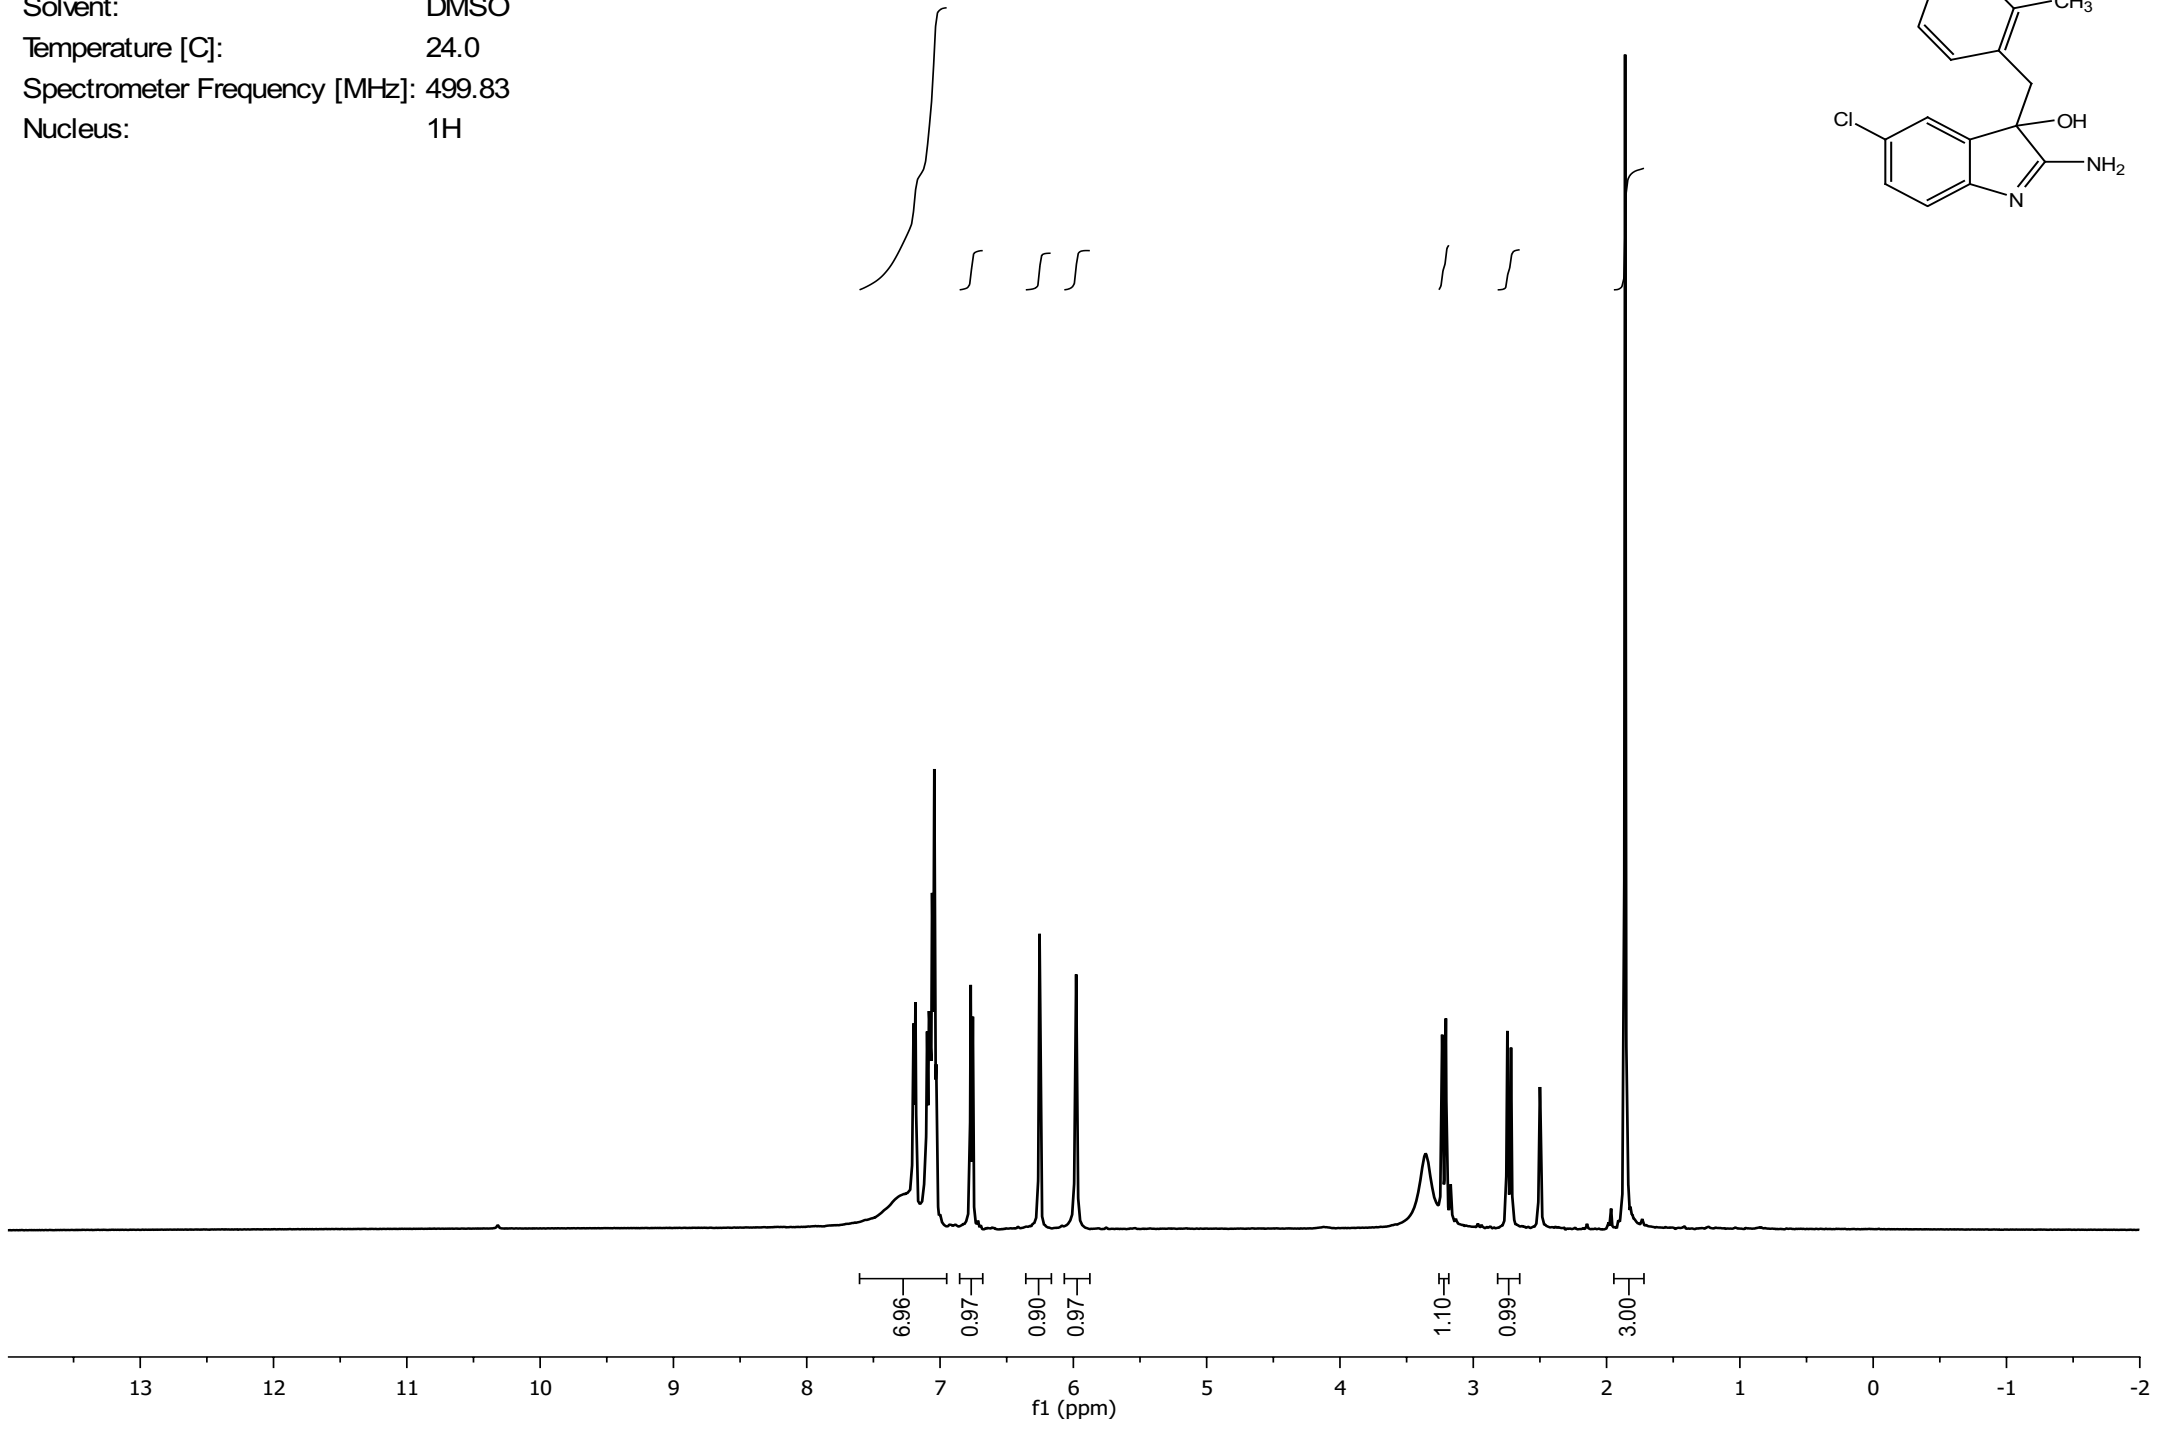

Parameter Value  
Solvent: DMSO  
Temperature [C]: 22.0  
Spectrometer Frequency [MHz]: 125.69  
Nucleus: <sup>13</sup>C

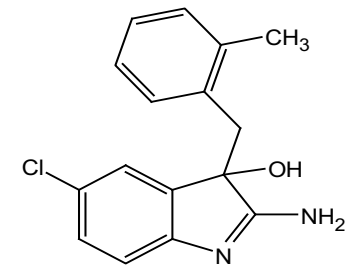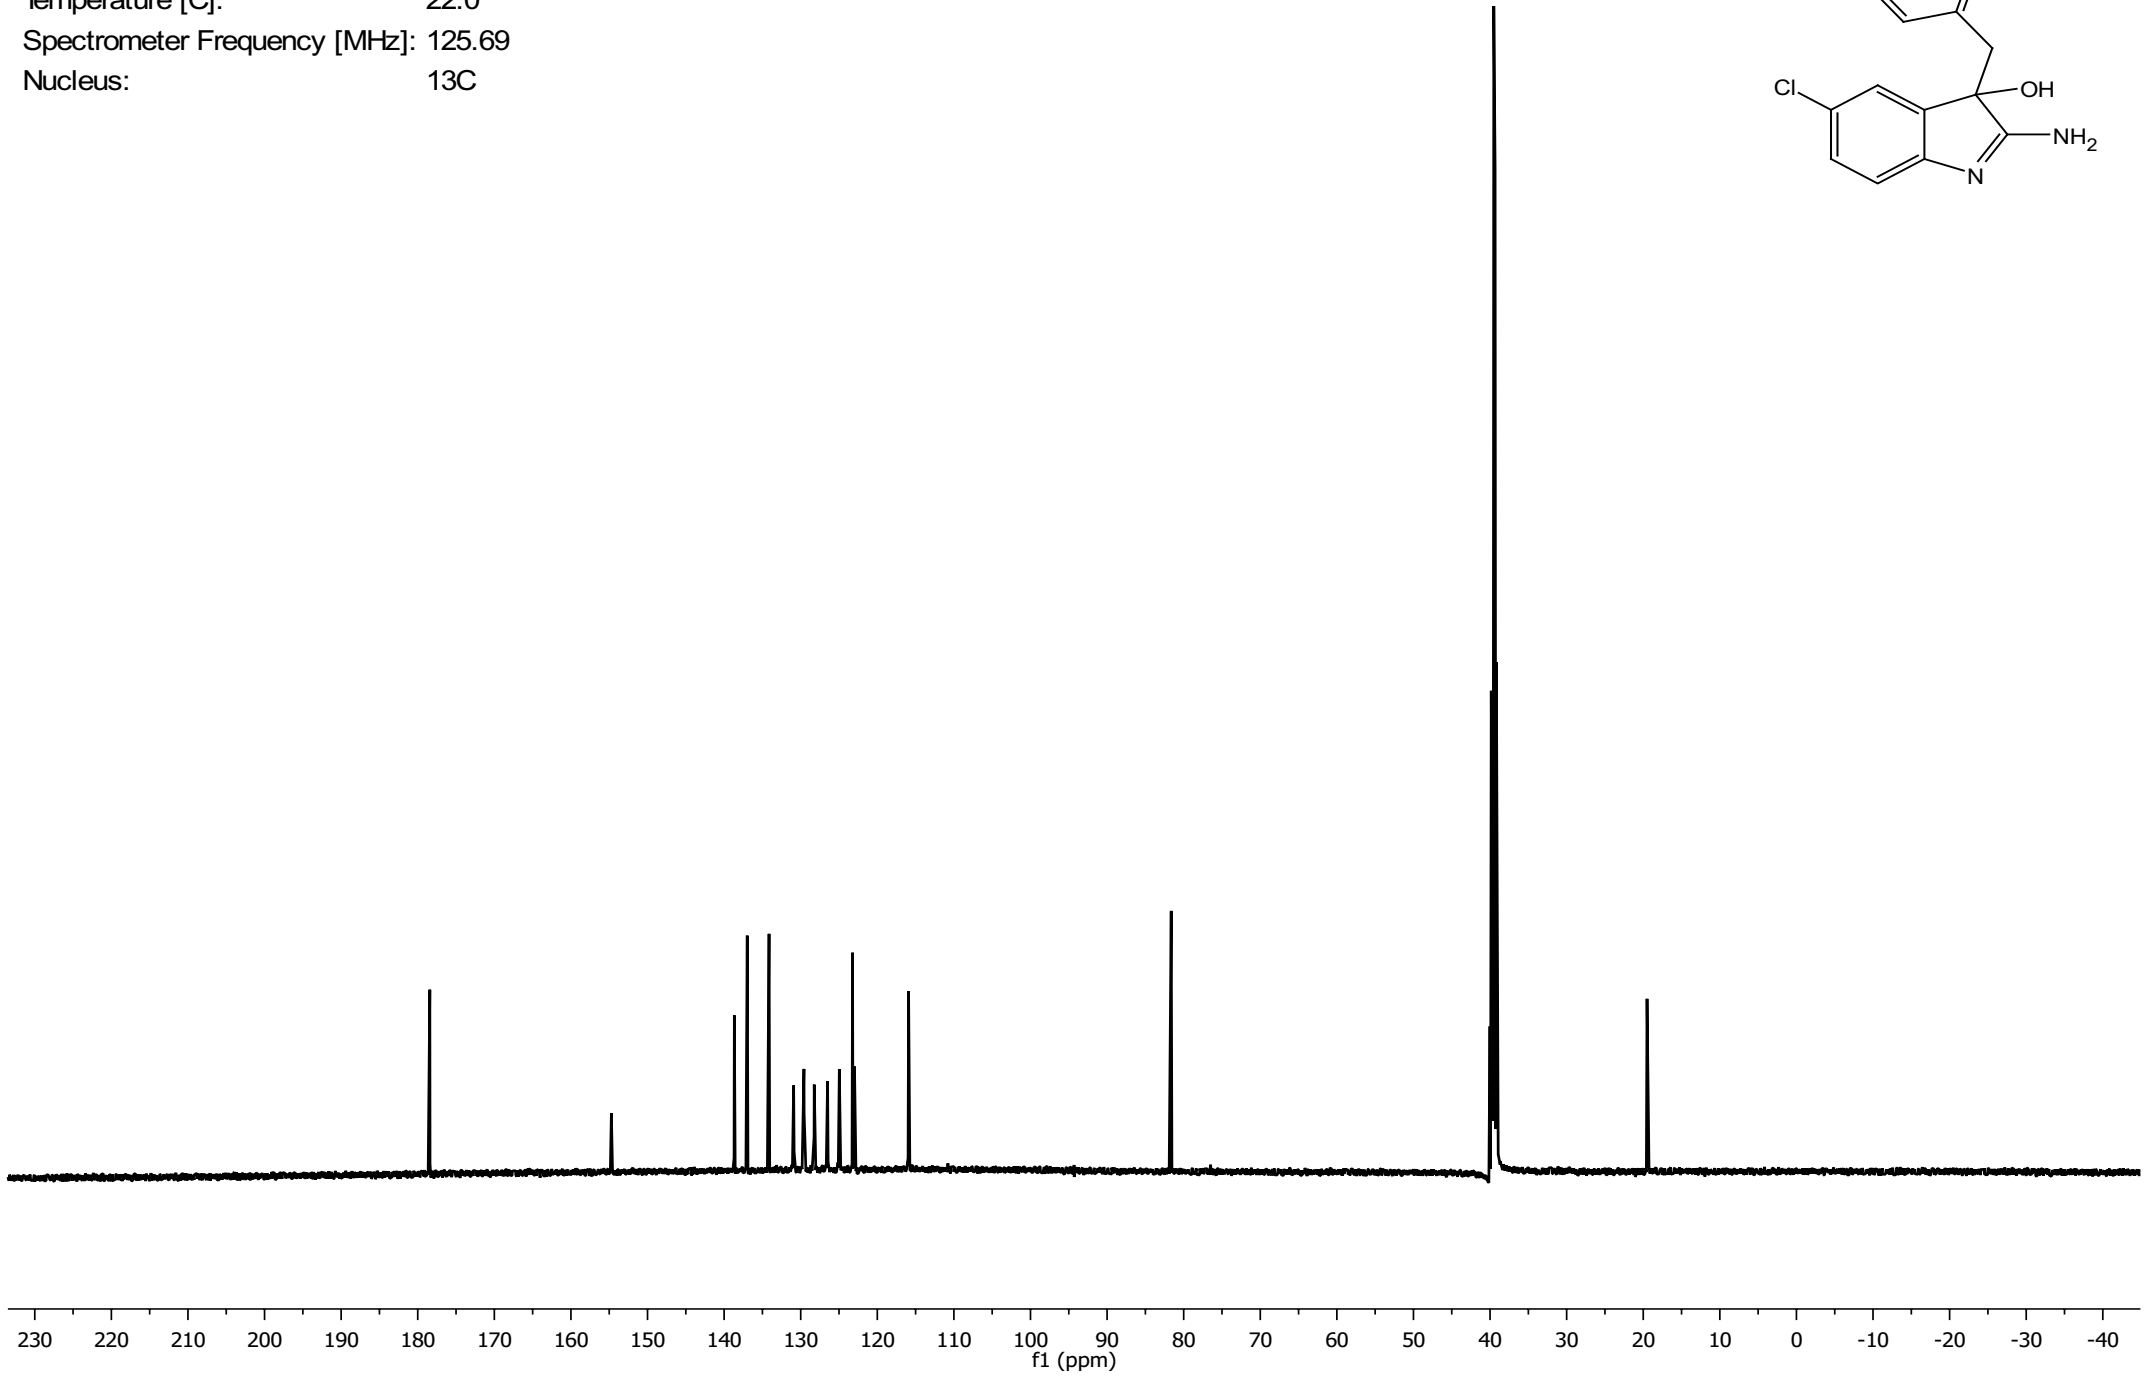

Parameter Value  
Solvent: DMSO  
Temperature [K]: 300.0  
Nucleus:  $^1\text{H}$   
Spectrometer Frequency [MHz]: 300.13

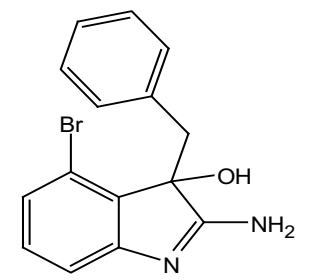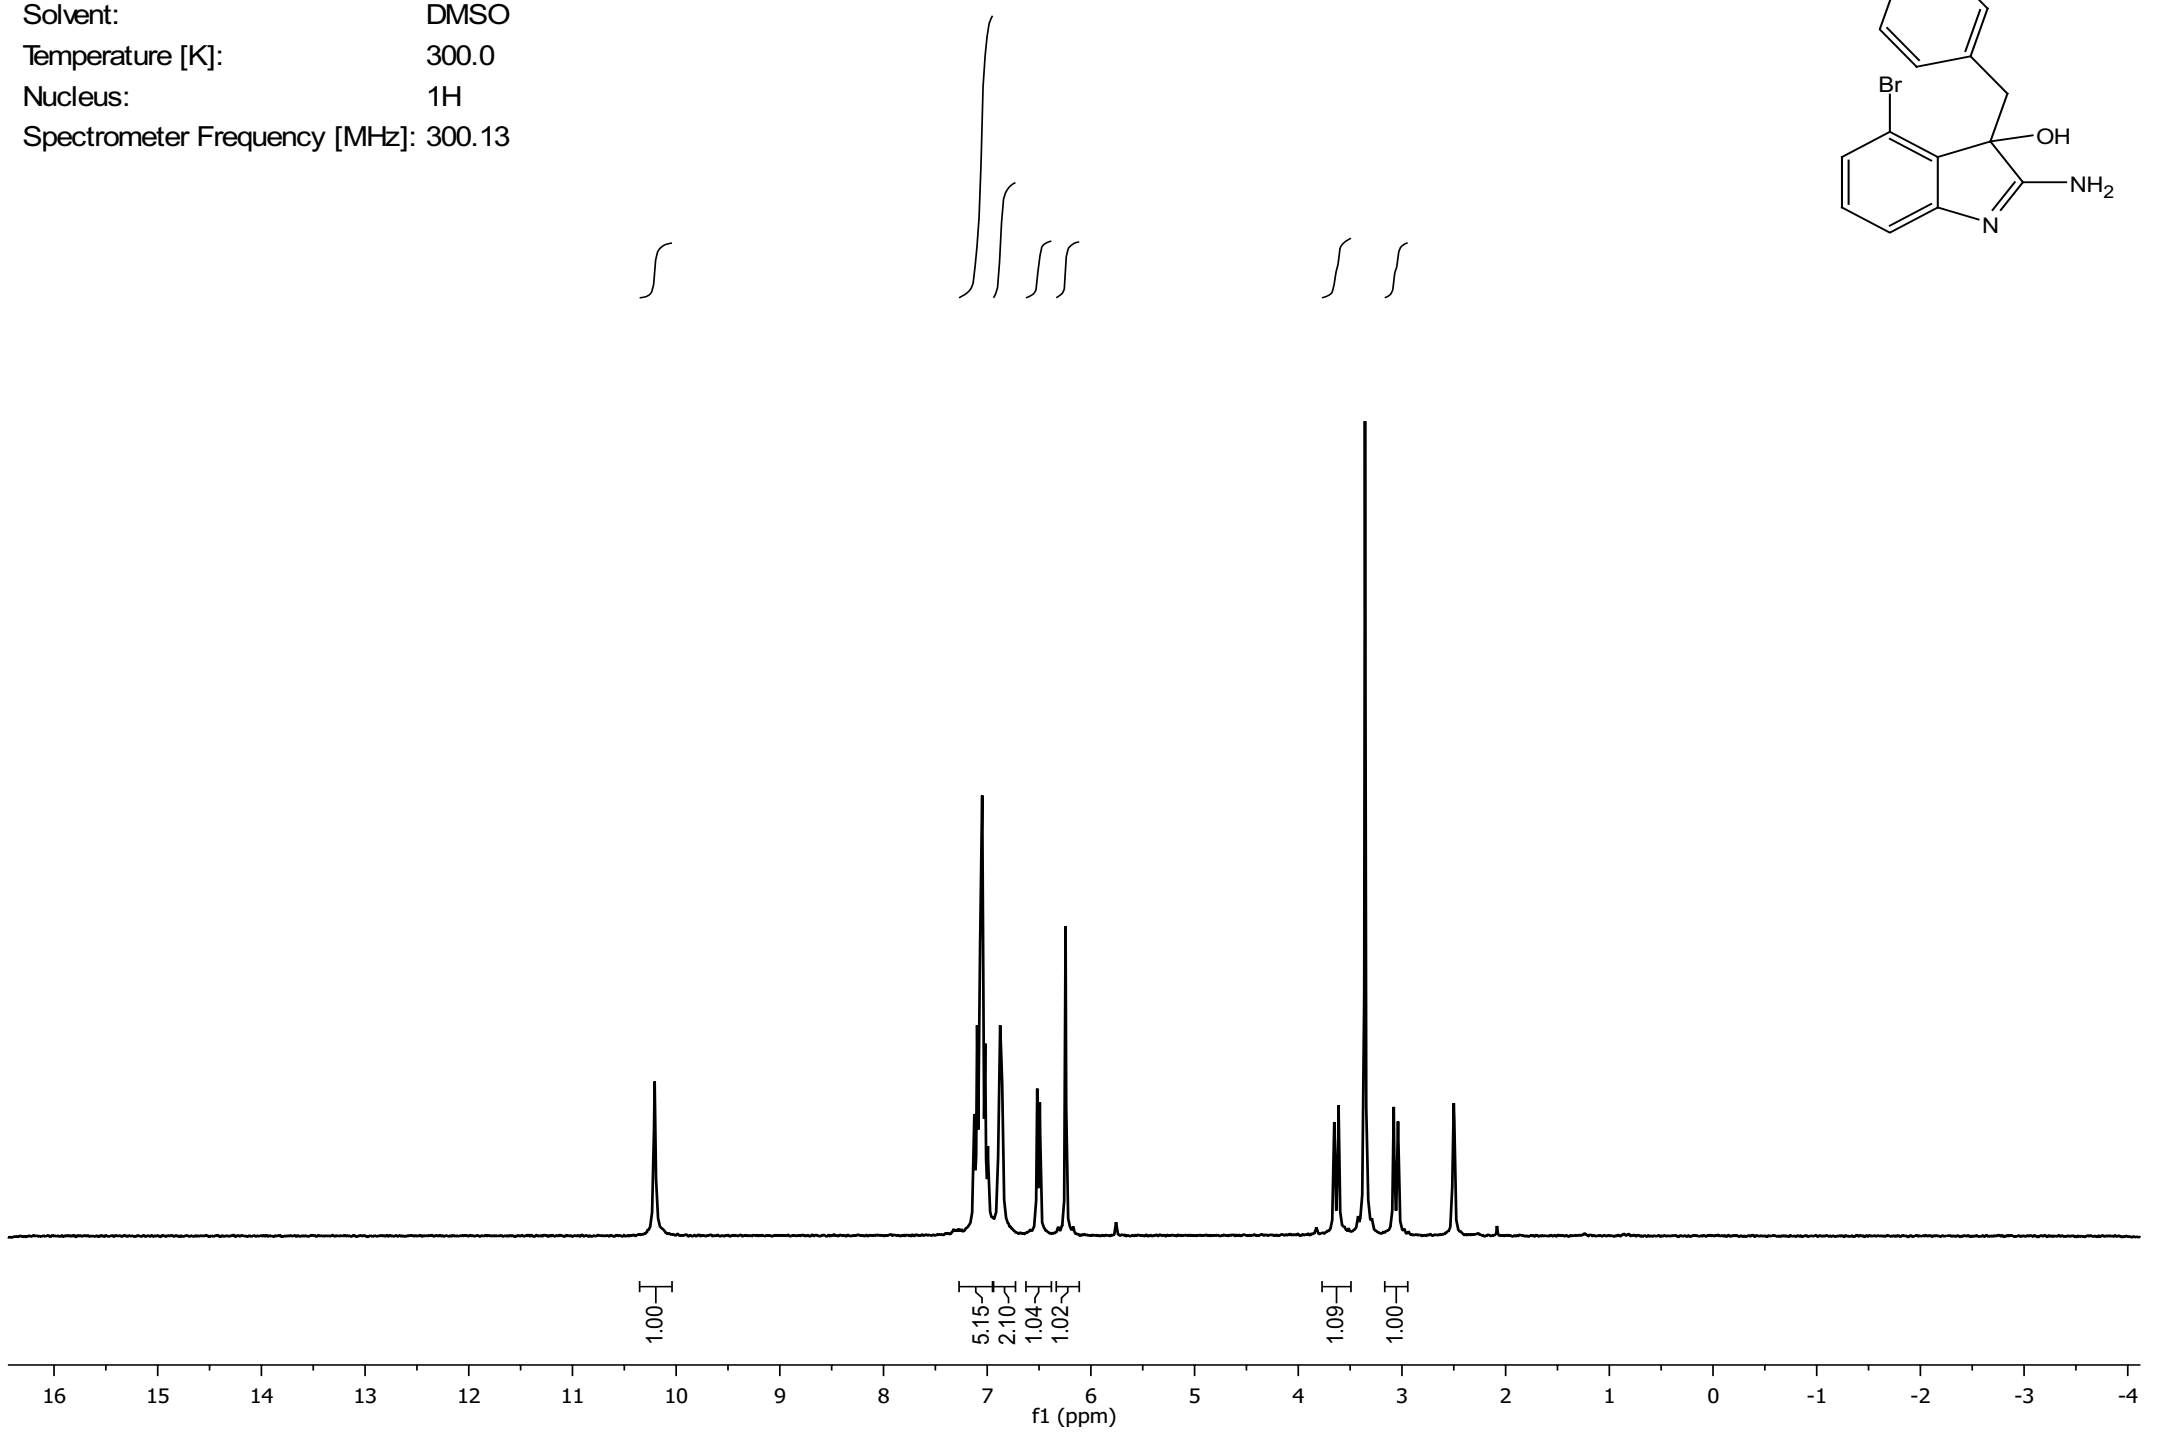

Parameter Value  
Solvent: DMSO  
Temperature [K]: 300.0  
Nucleus: <sup>13</sup>C  
Spectrometer Frequency [MHz]: 75.47

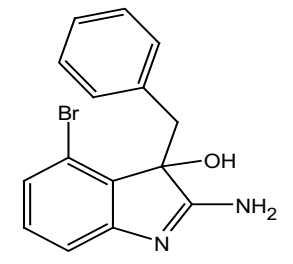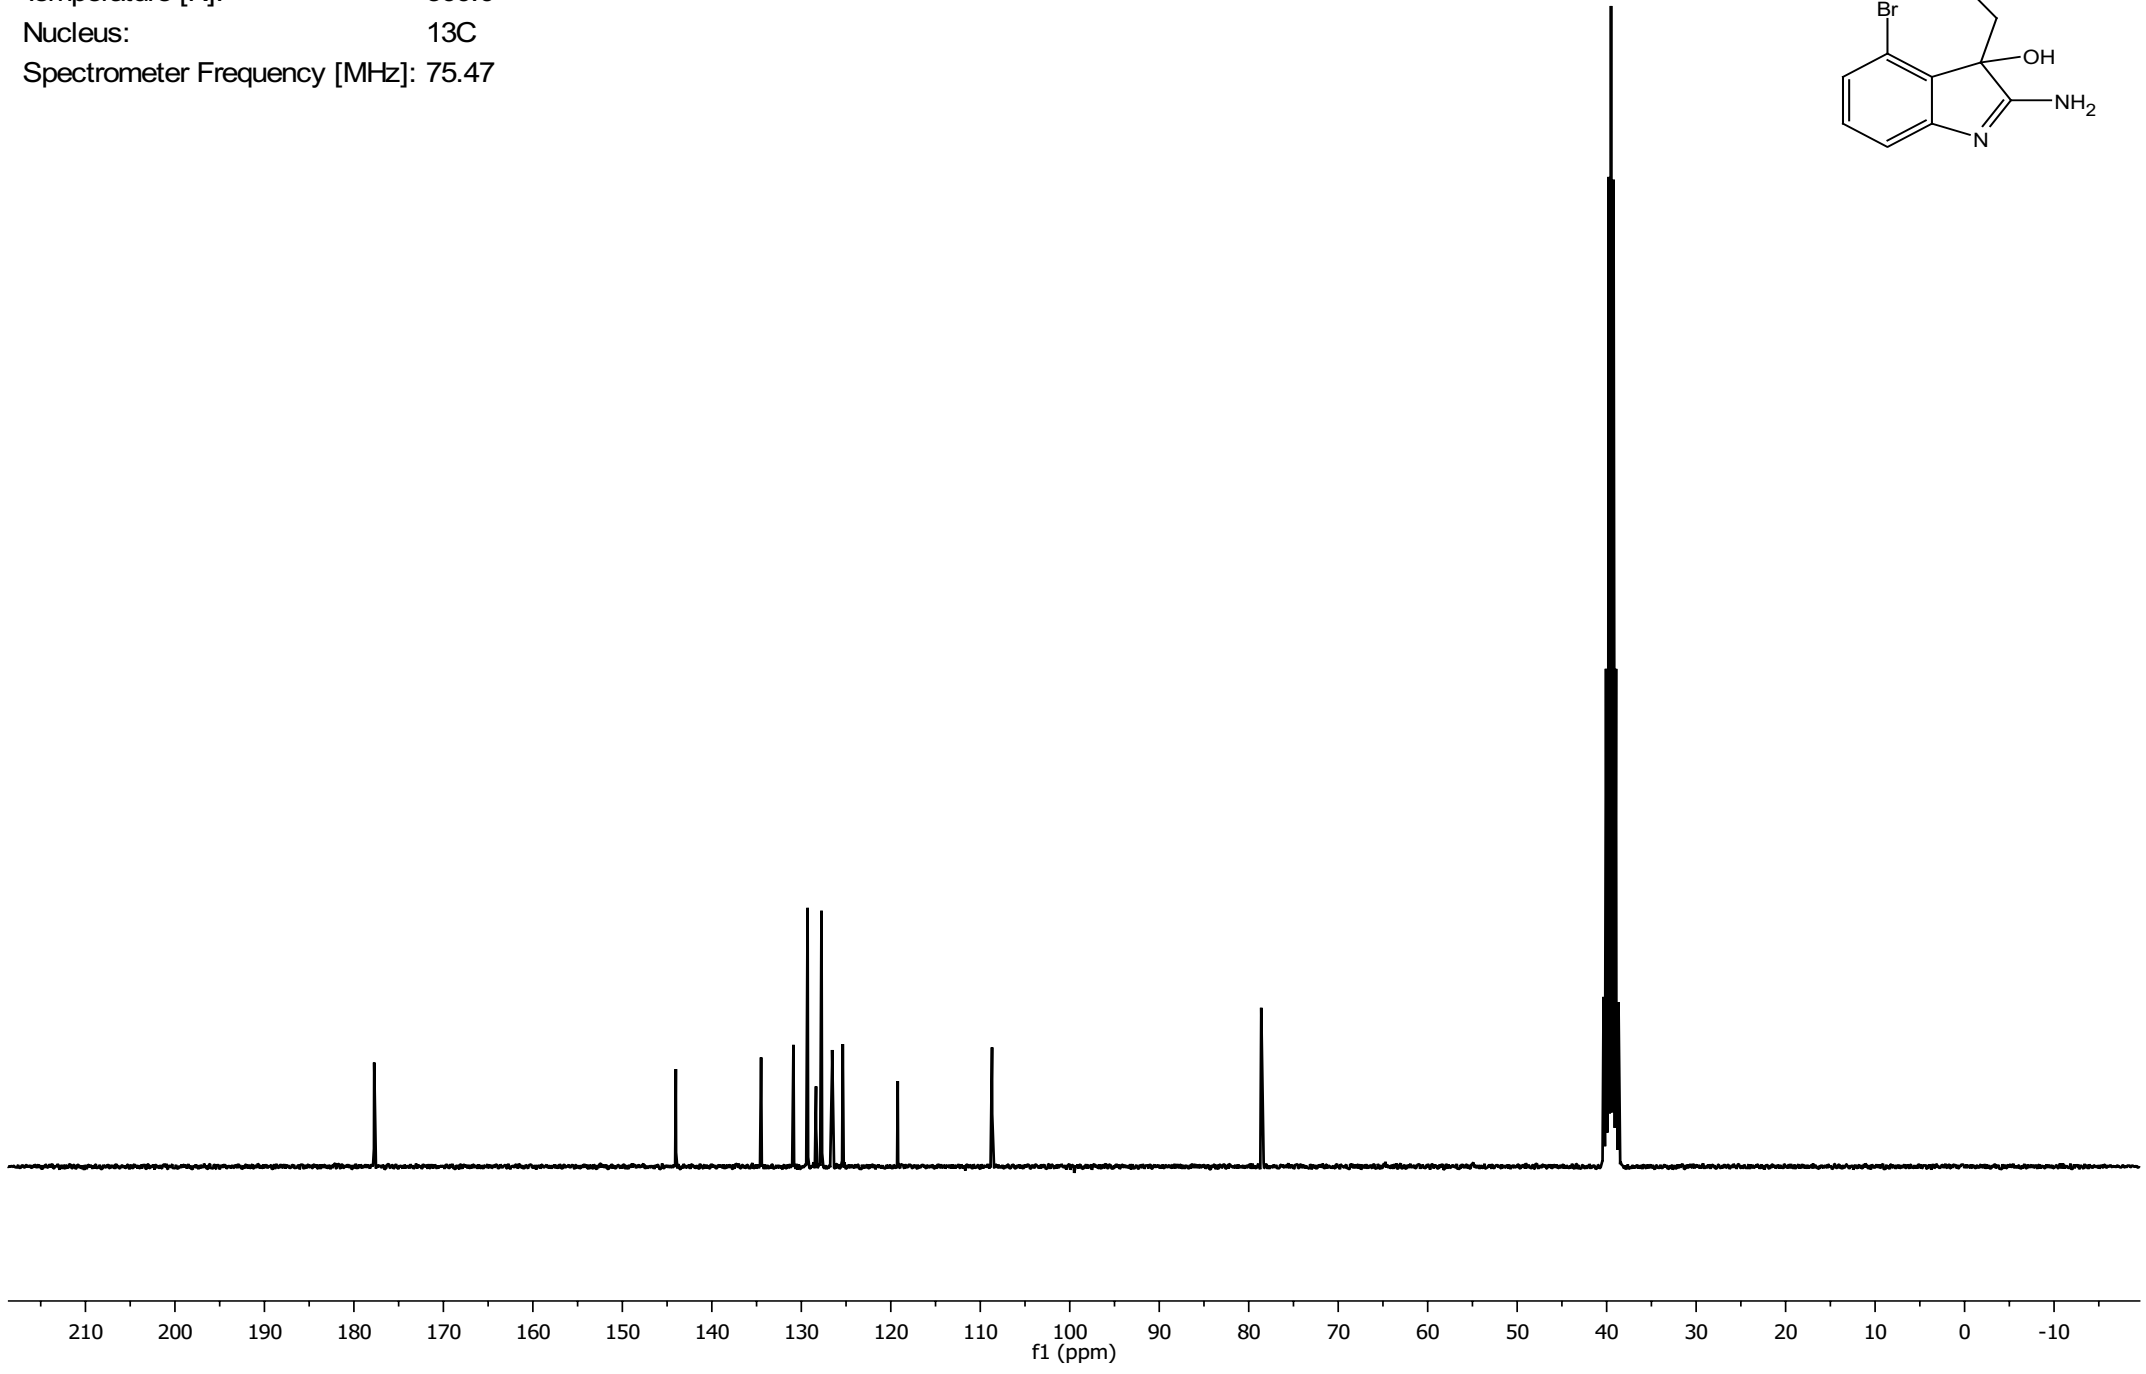

Parameter Value  
Solvent: DMSO  
Temperature [K]: 300.0  
Nucleus: <sup>1</sup>H  
Spectrometer Frequency [MHz]: 300.13

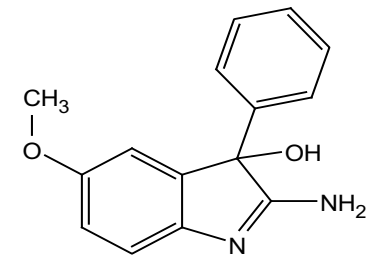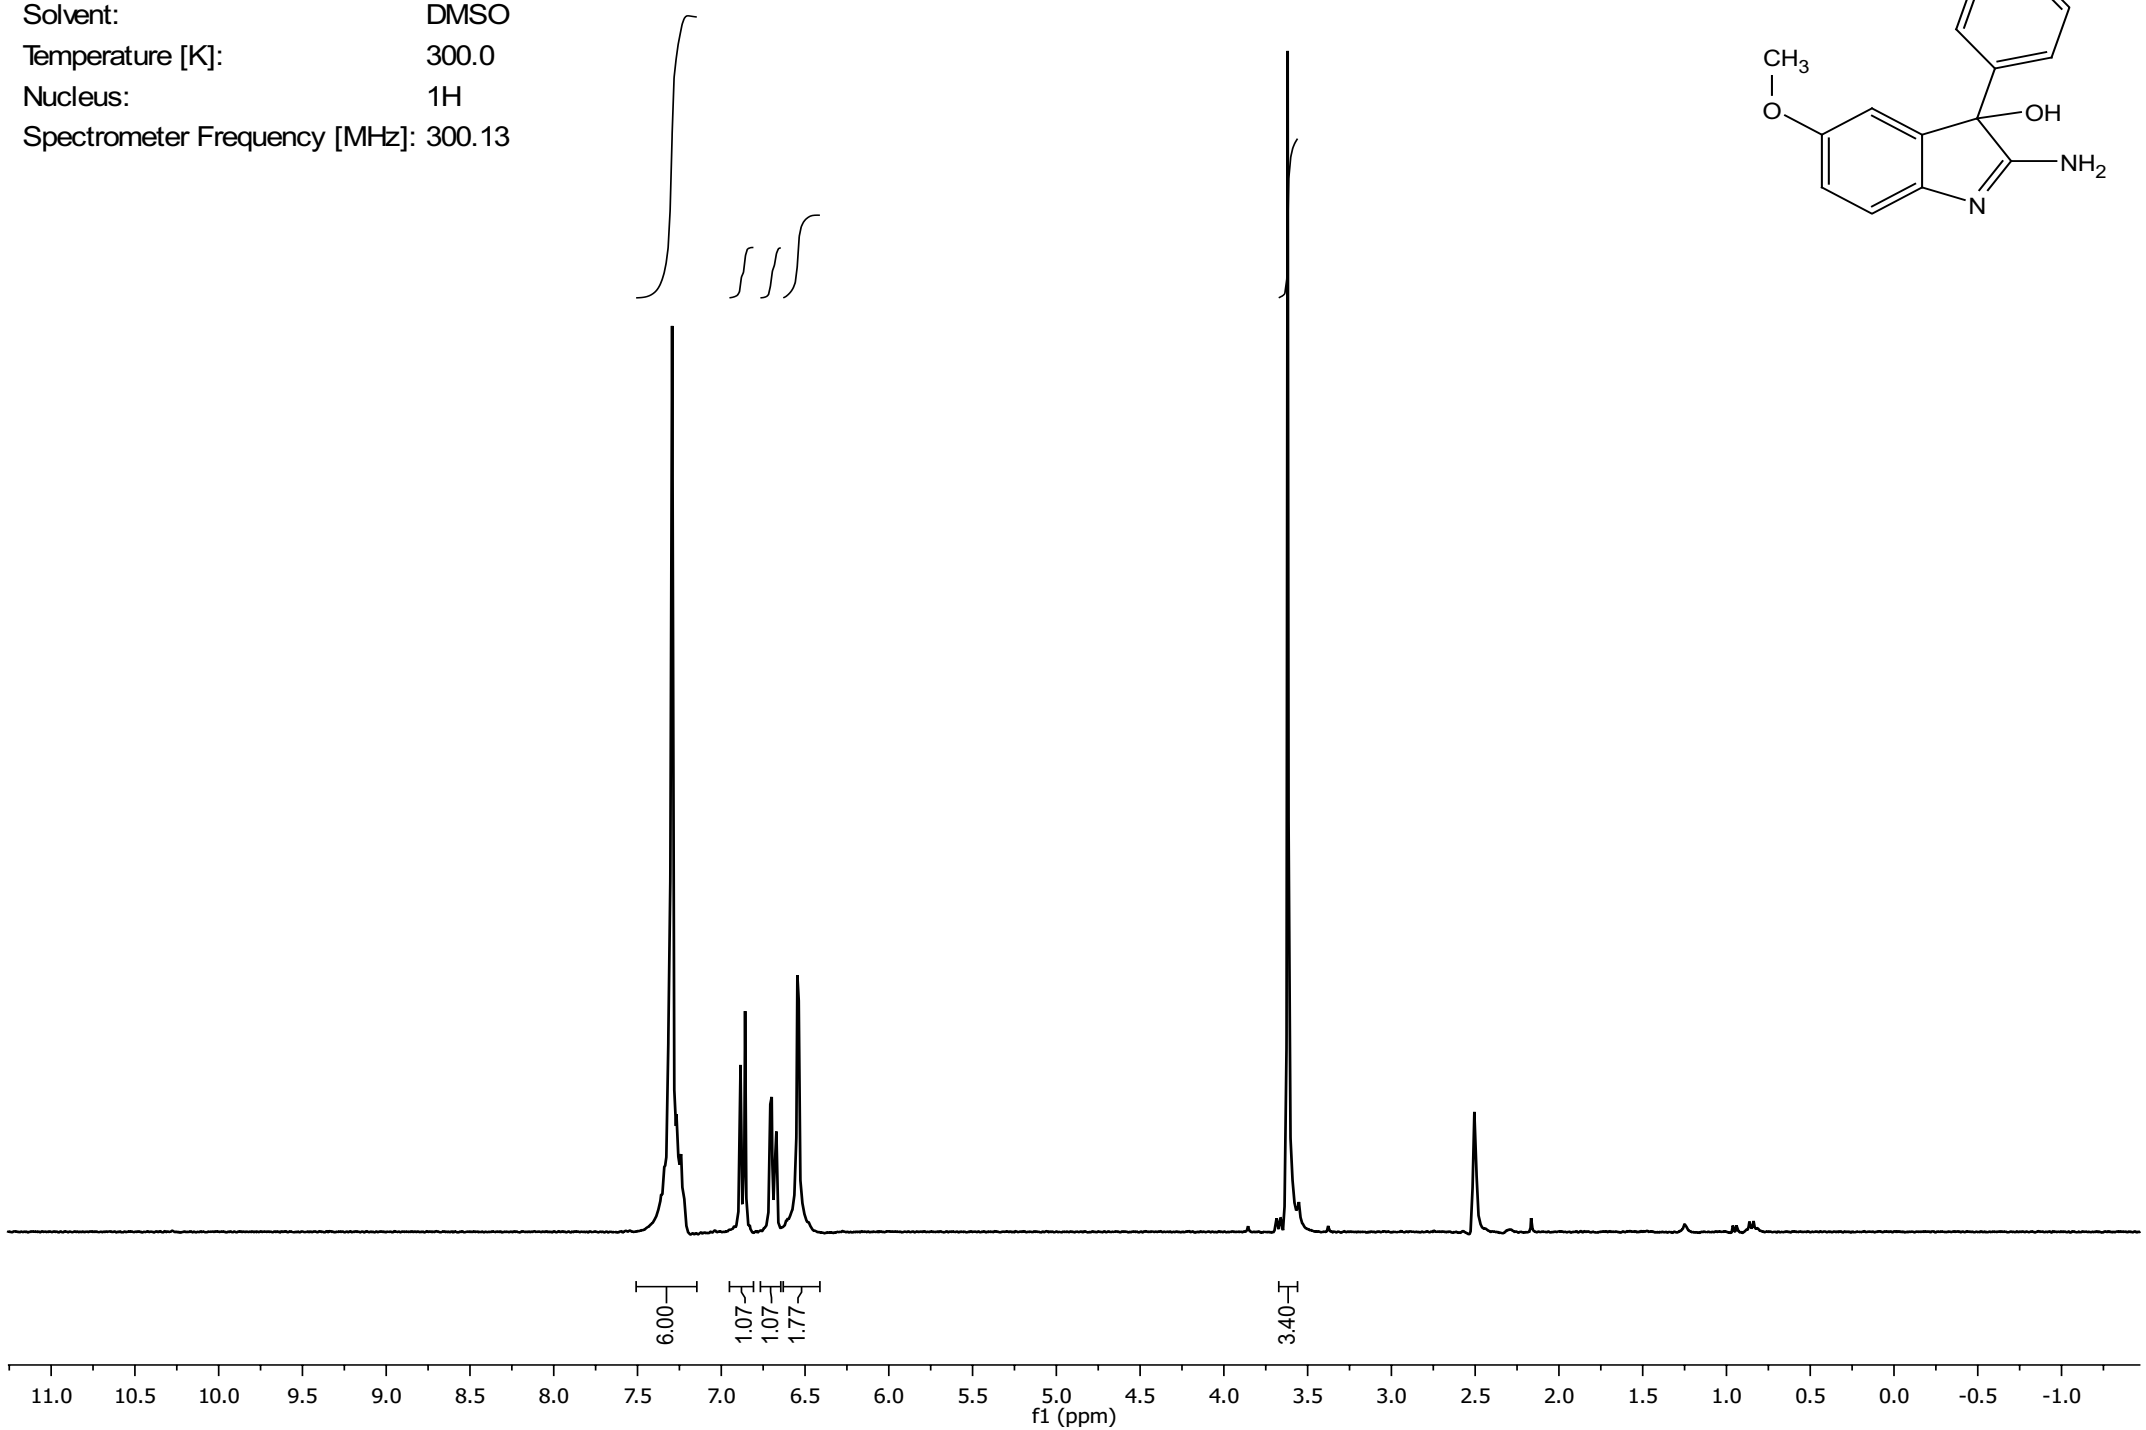

Parameter Value  
Solvent: DMSO  
Temperature [K]: 300.0  
Nucleus: <sup>13</sup>C  
Spectrometer Frequency [MHz]: 75.47

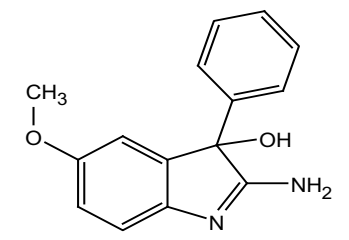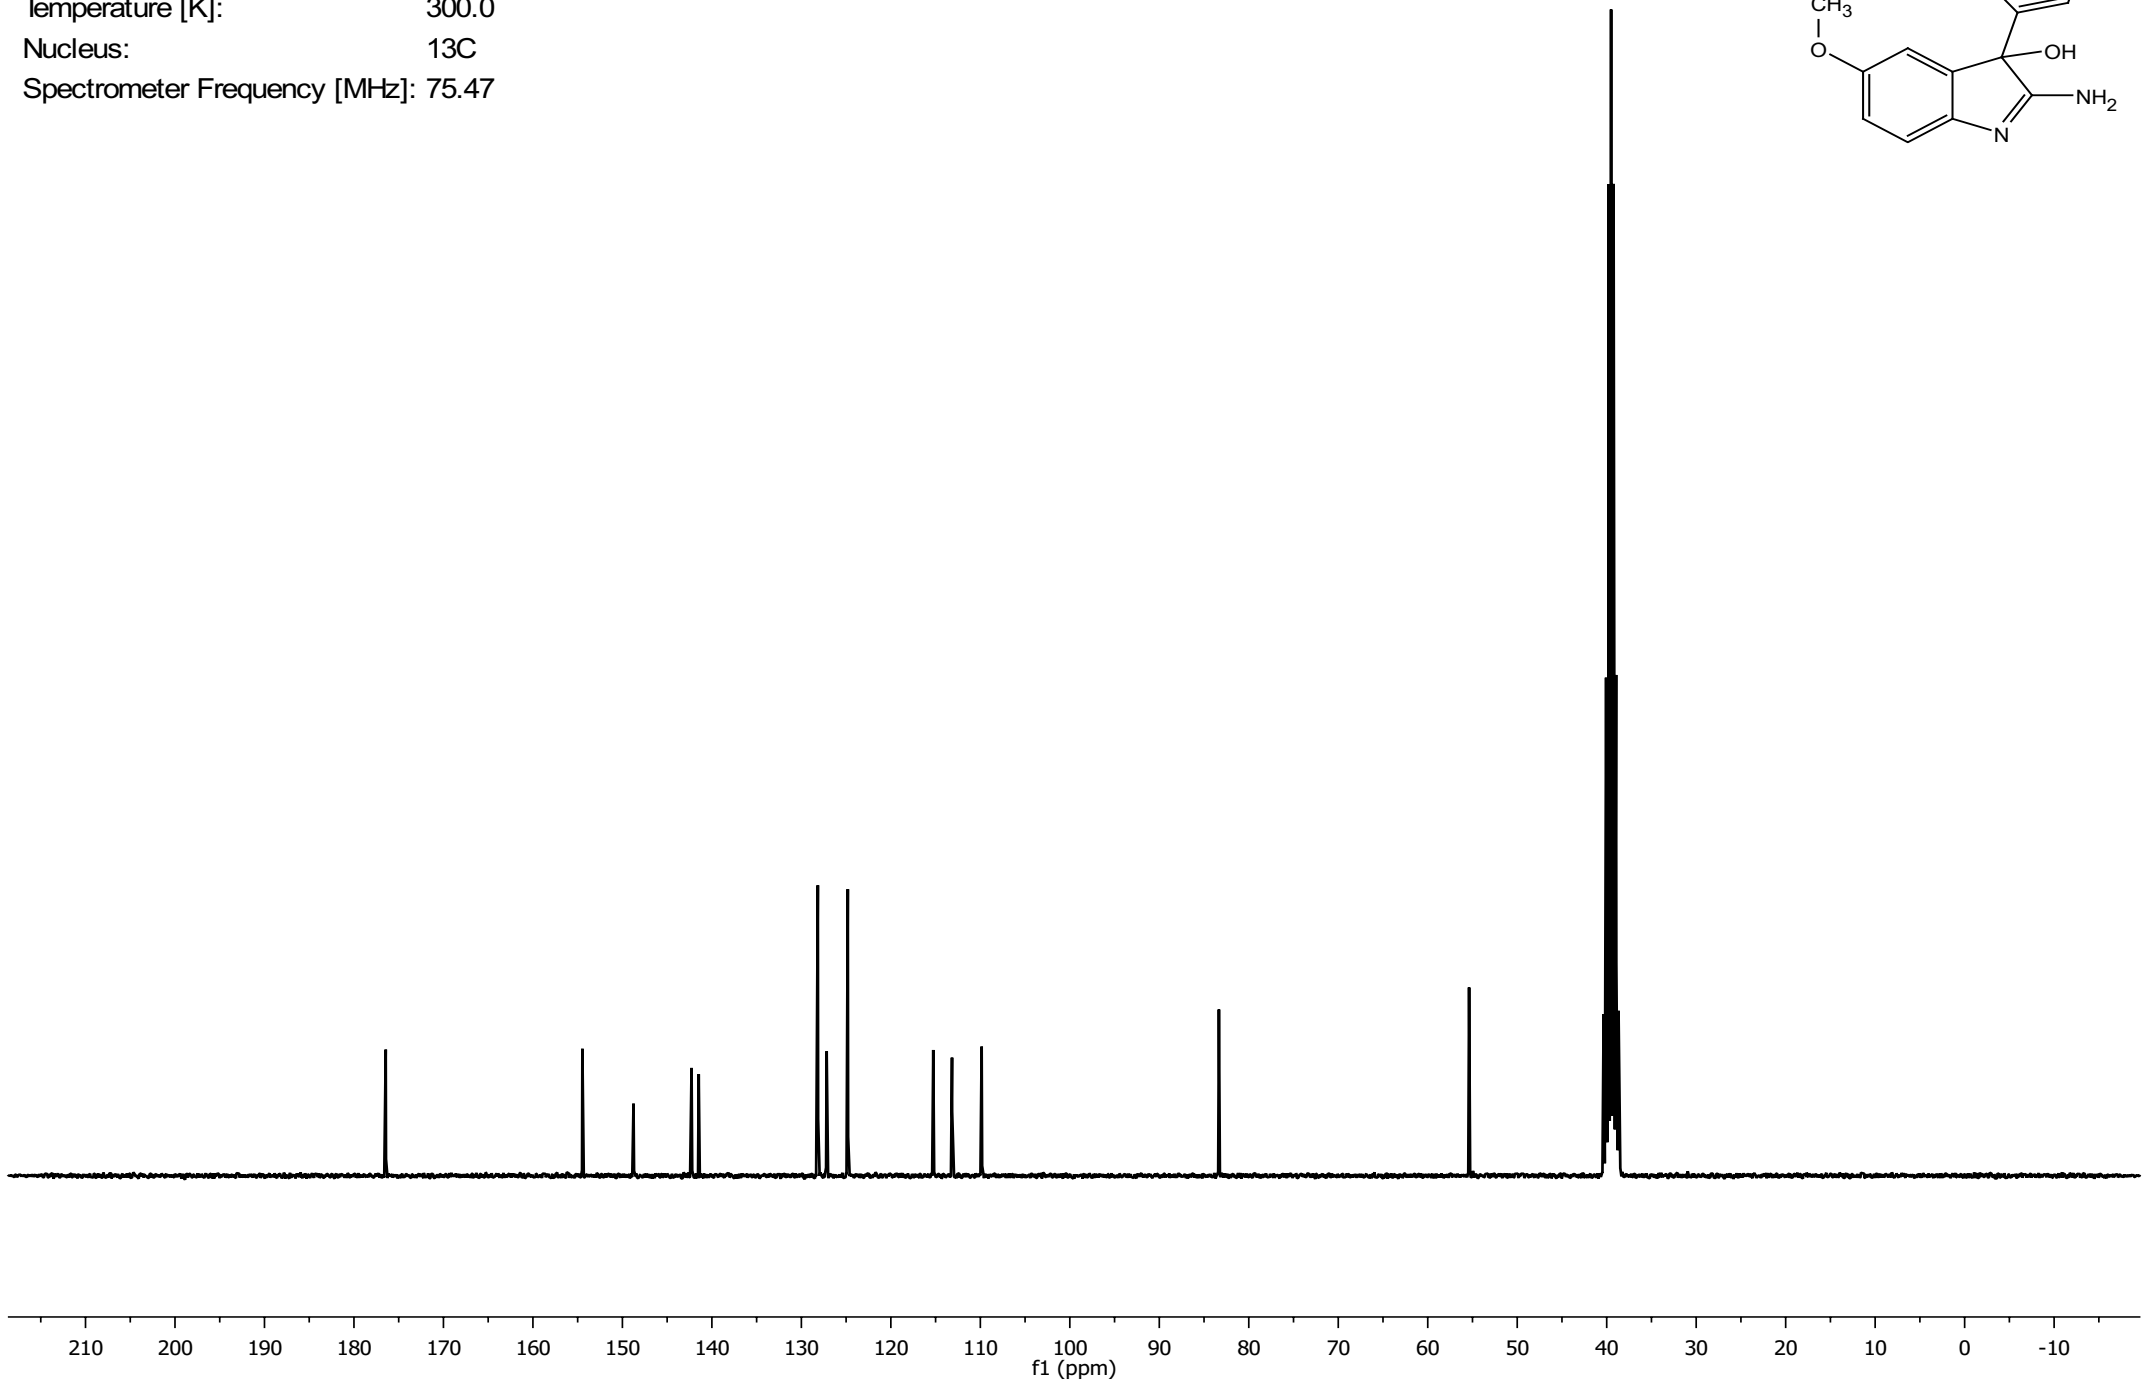



Parameter Value  
Solvent: DMSO  
Temperature [K]: 300.0  
Nucleus: <sup>1</sup>H  
Spectrometer Frequency [MHz]: 300.13

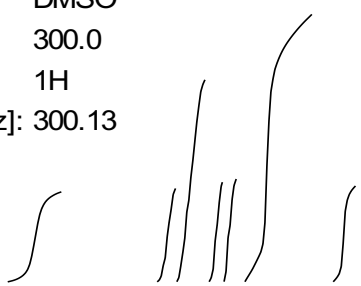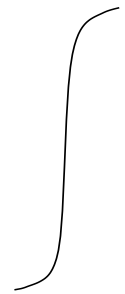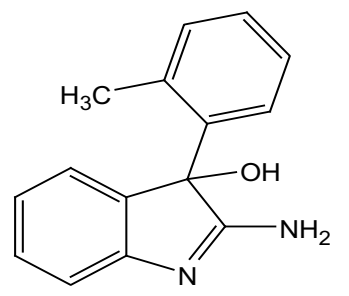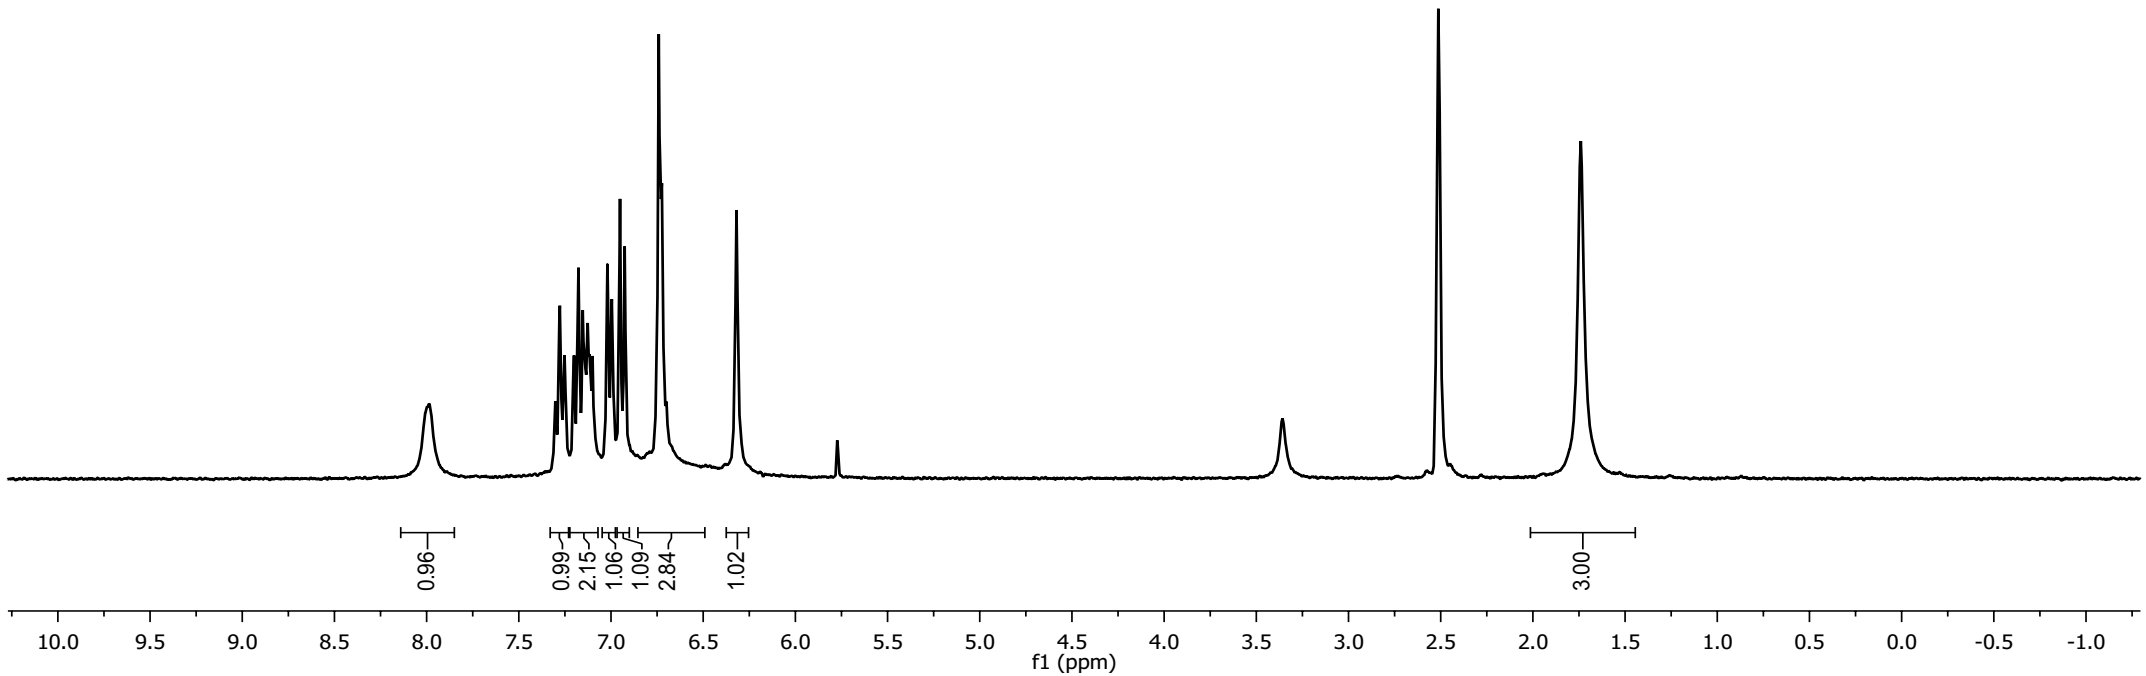

Parameter Value  
Solvent: DMSO  
Temperature [K]: 300.0  
Nucleus: <sup>13</sup>C  
Spectrometer Frequency [MHz]: 75.47

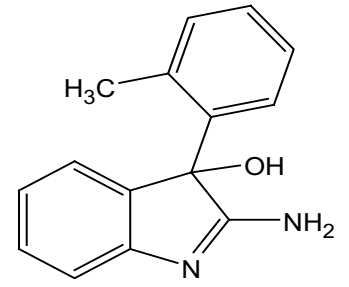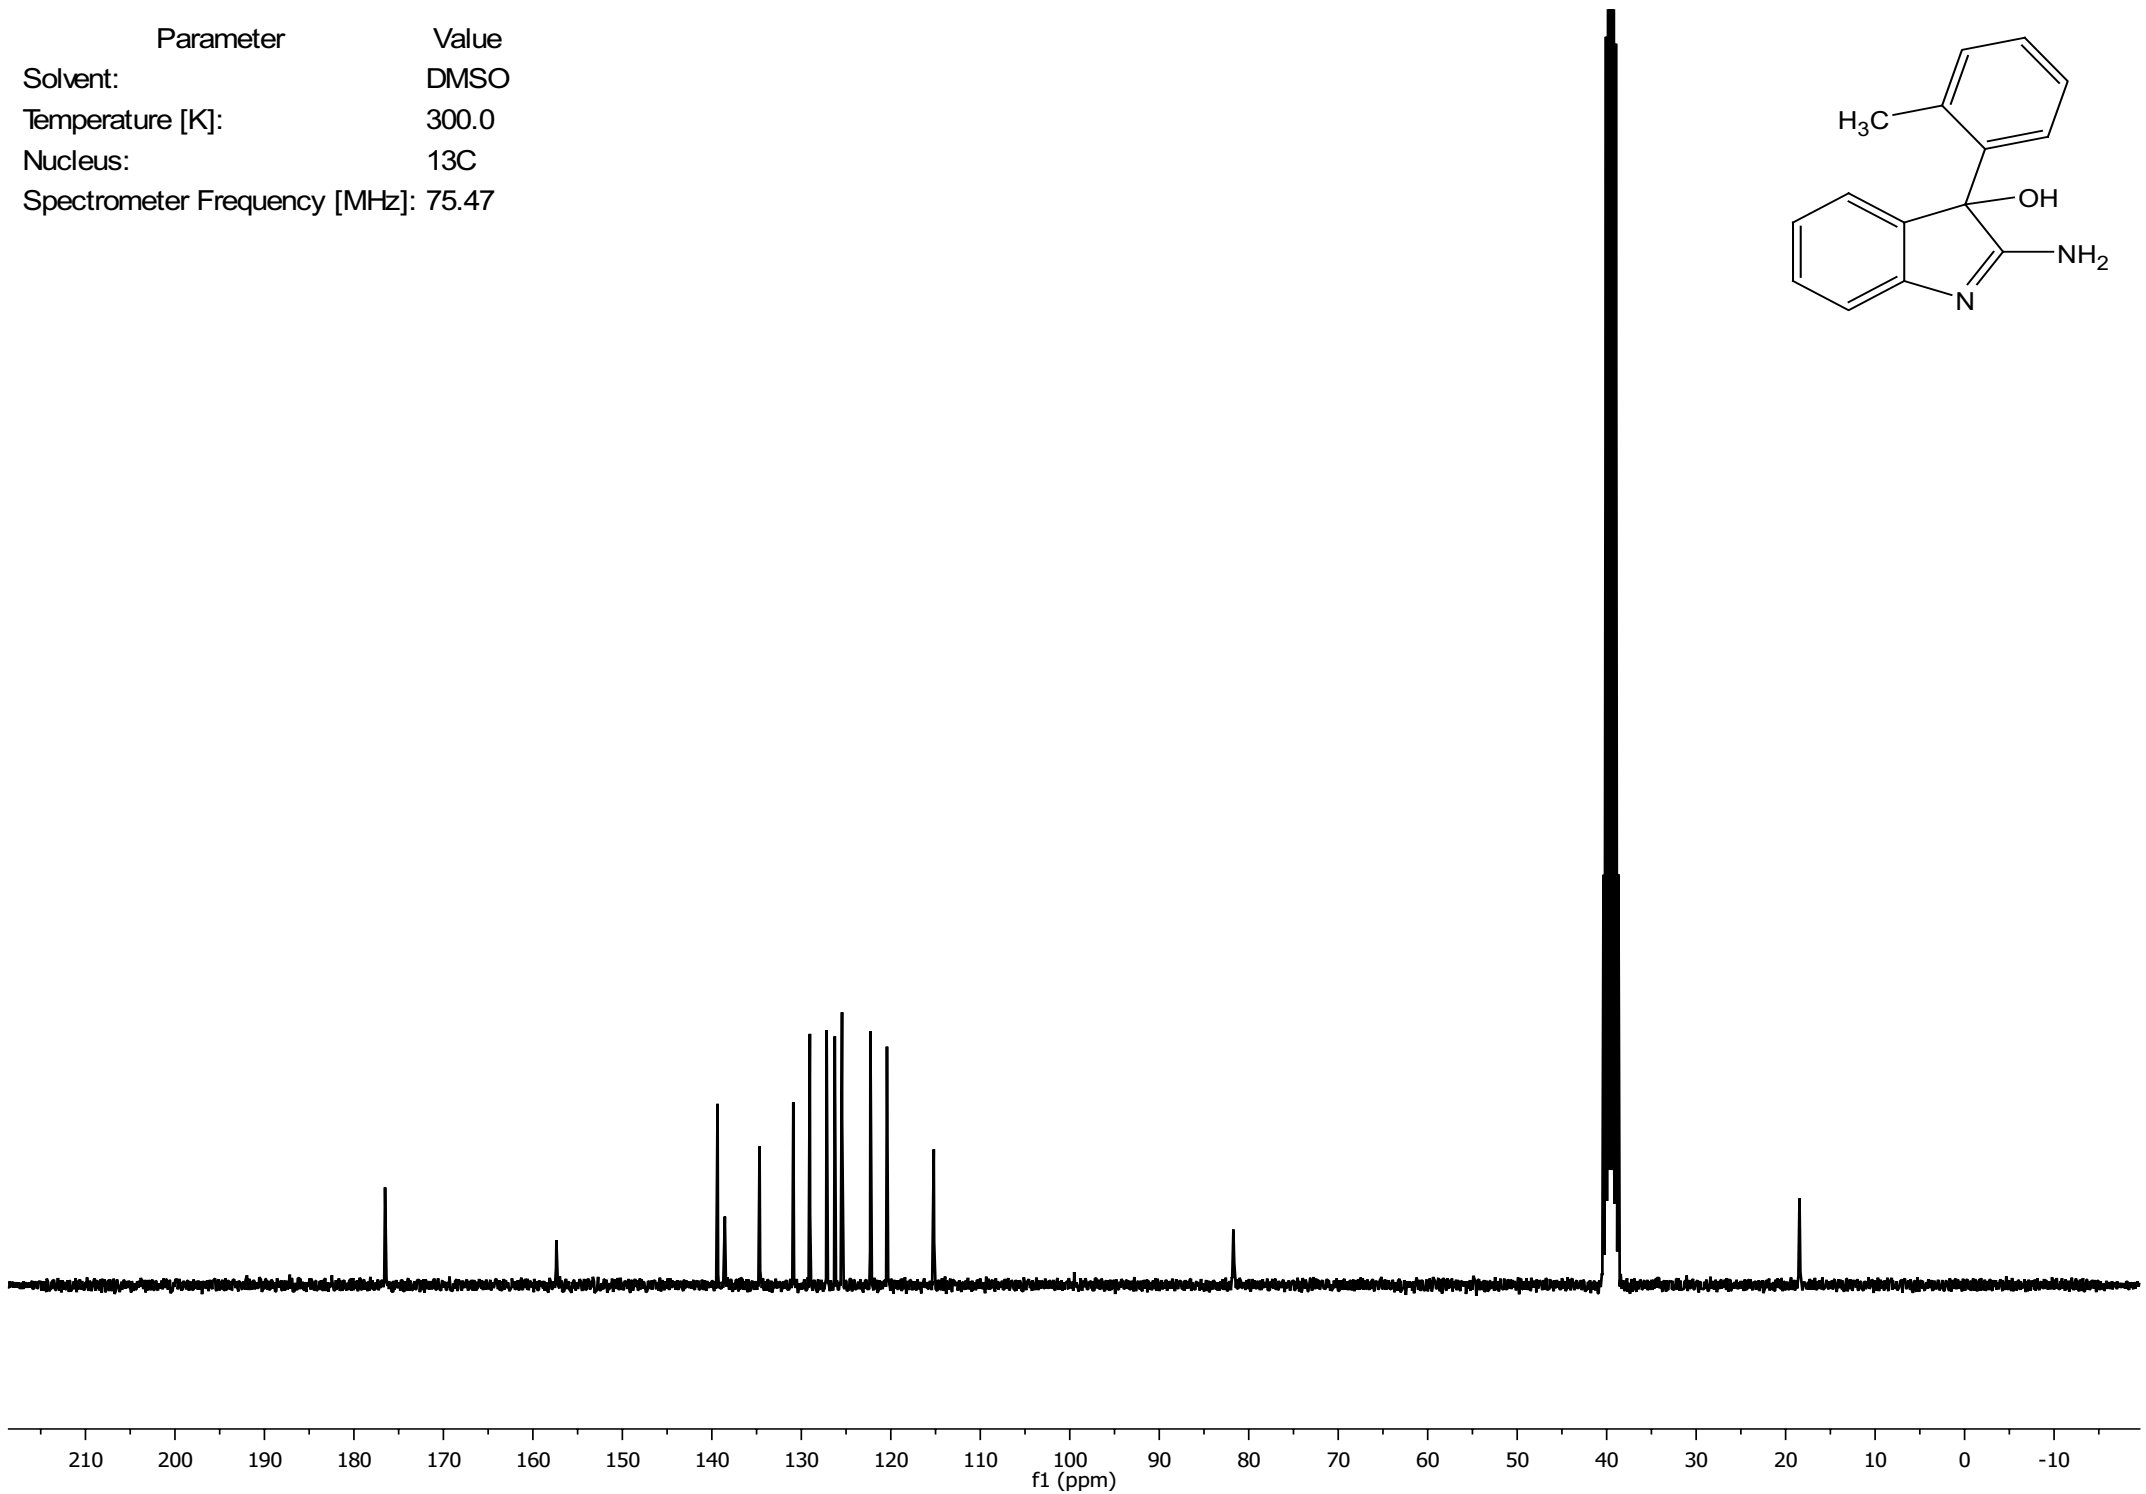

Parameter Value  
Solvent: DMSO  
Temperature [C]: 24.0  
Spectrometer Frequency [MHz]: 499.83  
Nucleus: 1H

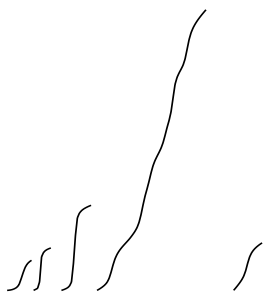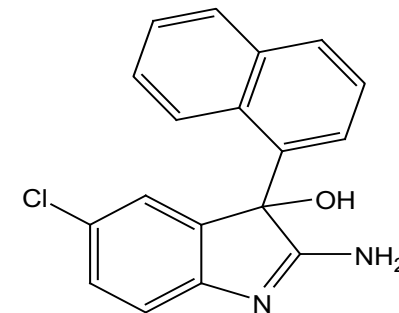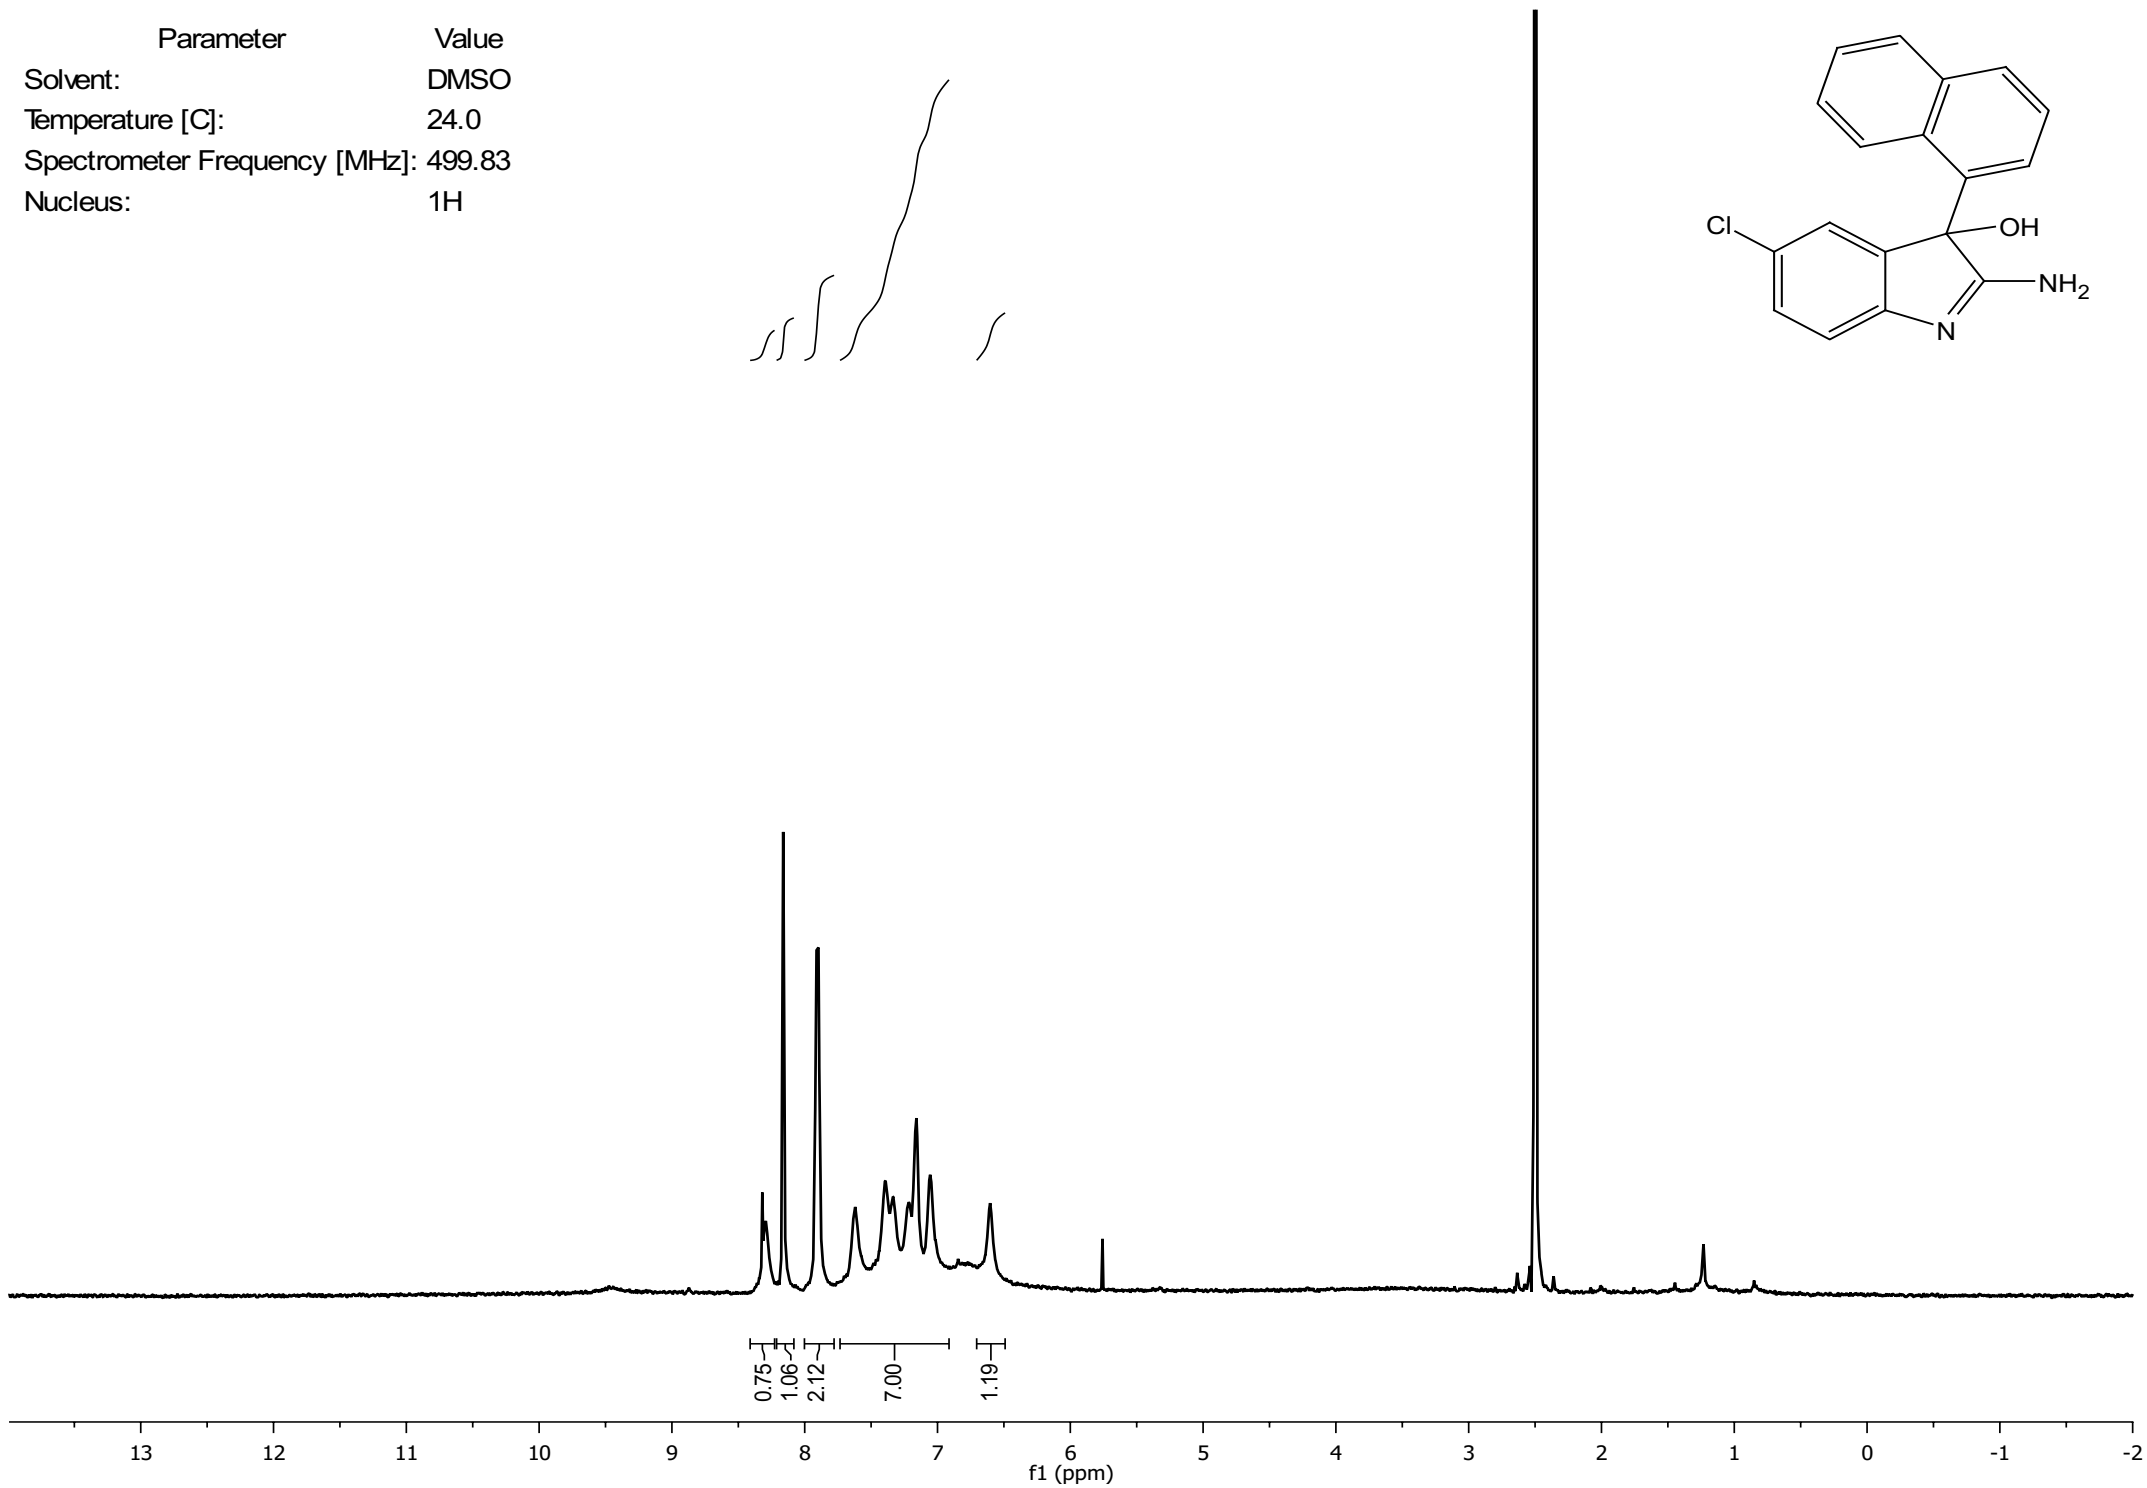

Parameter Value  
Solvent: DMSO  
Temperature [C]: 22.0  
Spectrometer Frequency [MHz]: 125.69  
Nucleus: <sup>13</sup>C

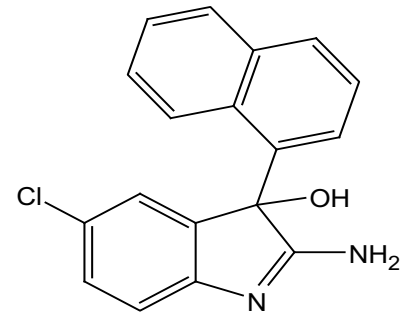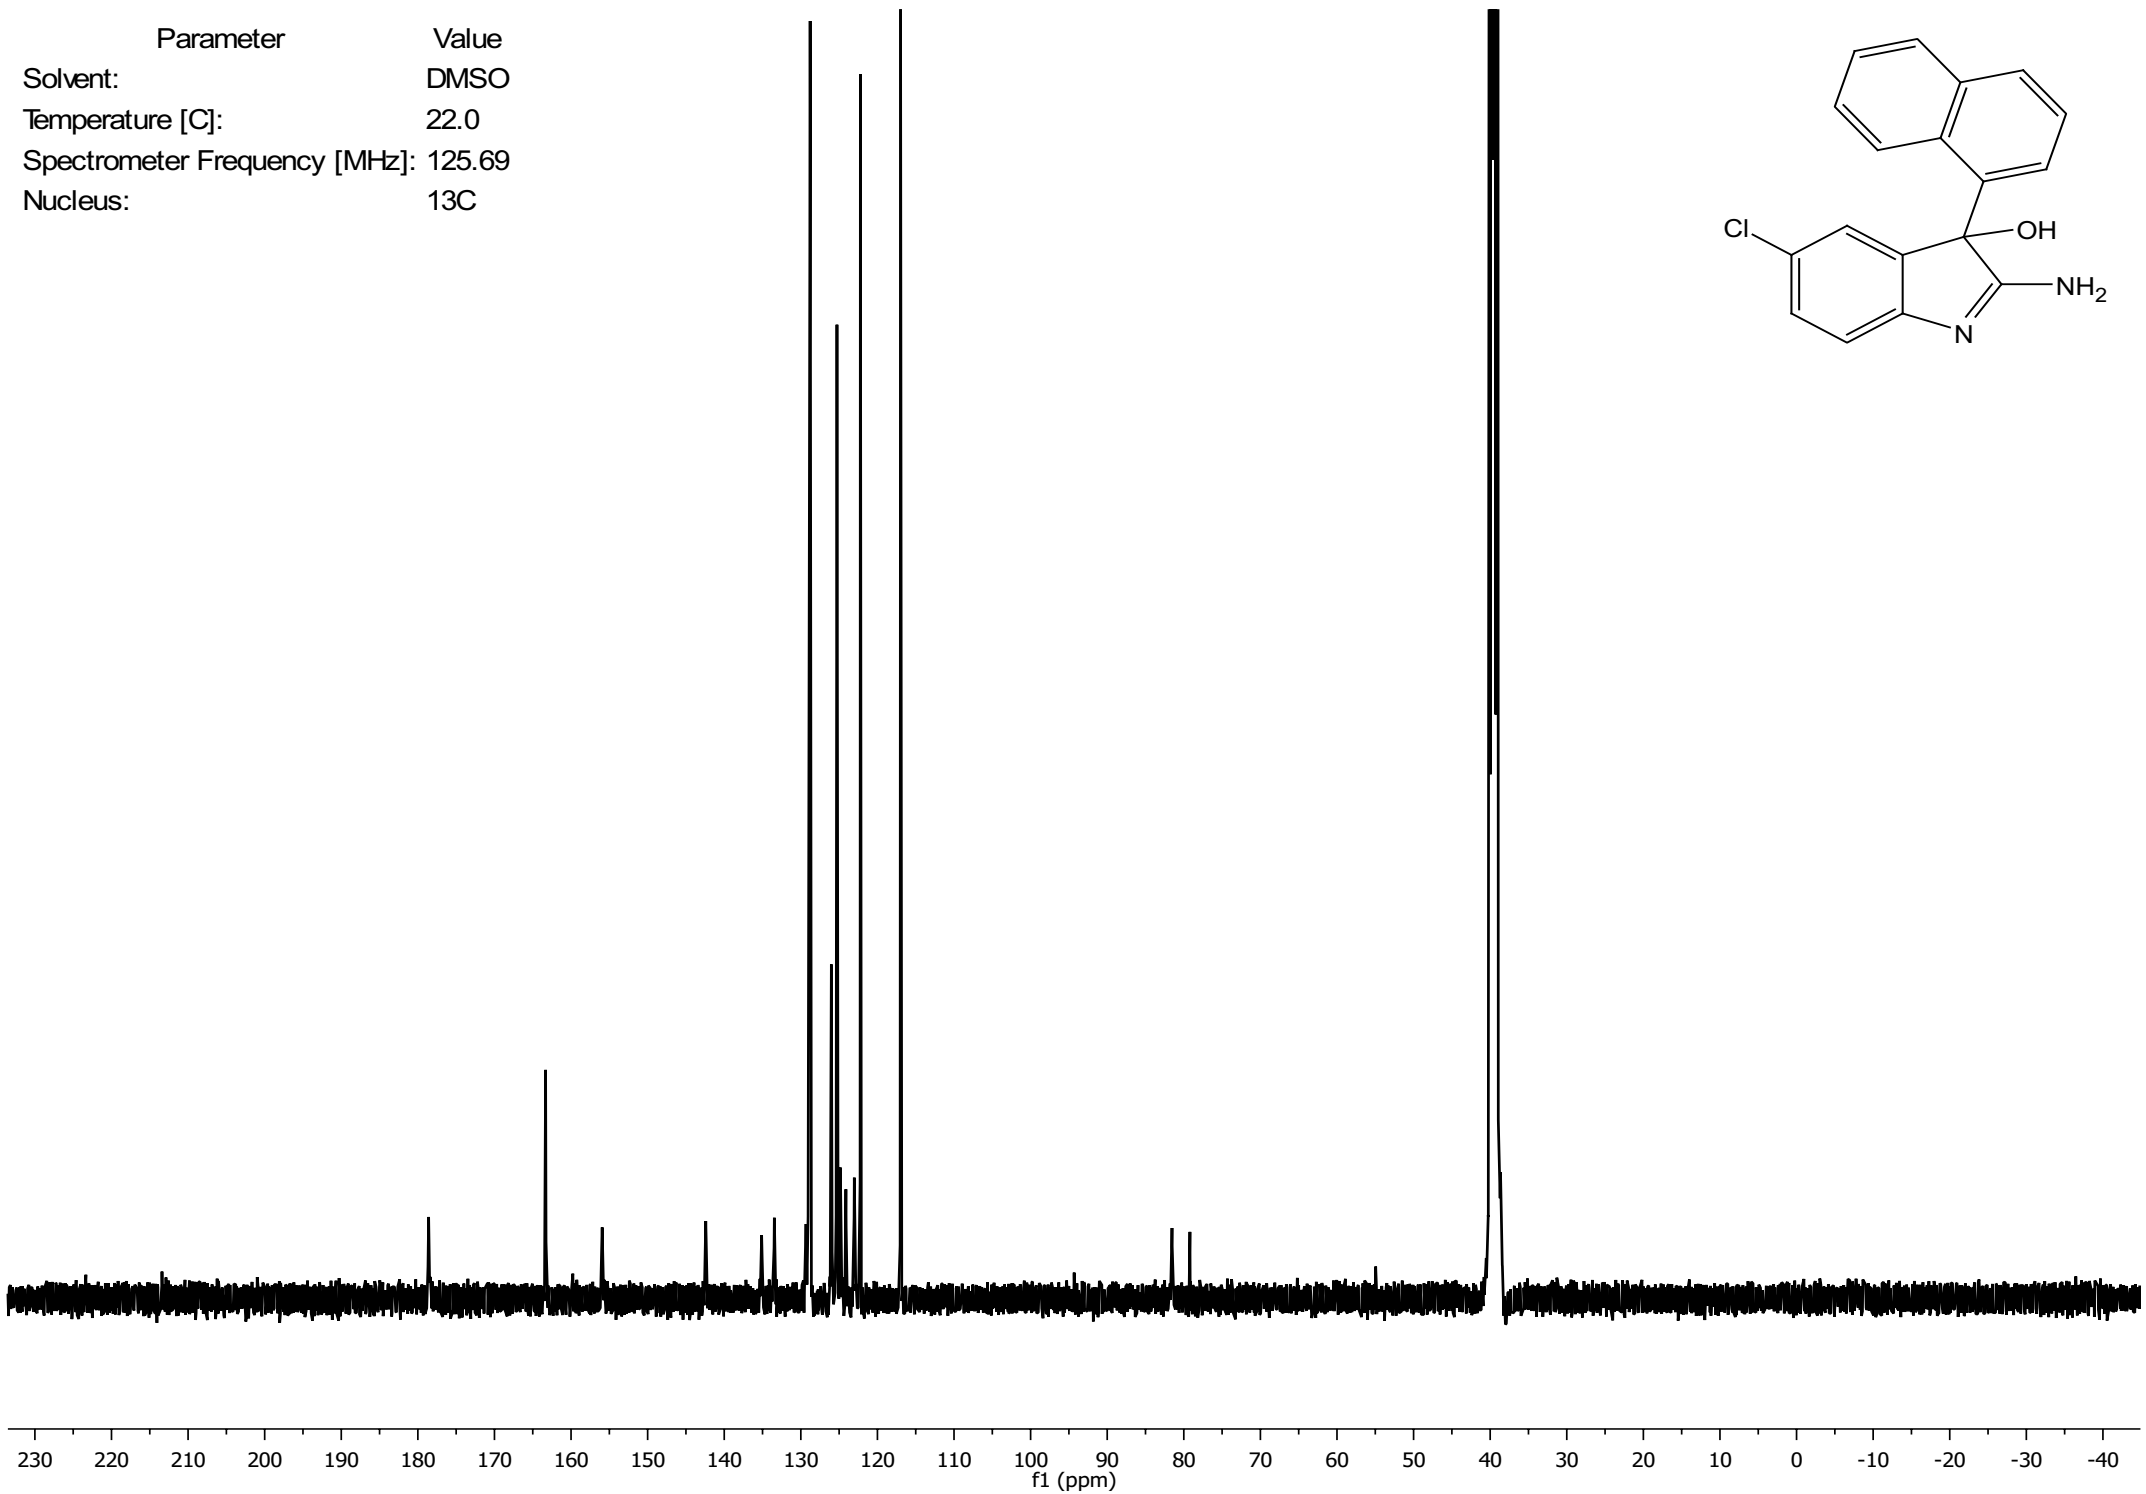

Parameter Value  
Solvent: DMSO  
Temperature [C]: 25.0  
Spectrometer Frequency [MHz]: 499.83  
Nucleus: <sup>1</sup>H

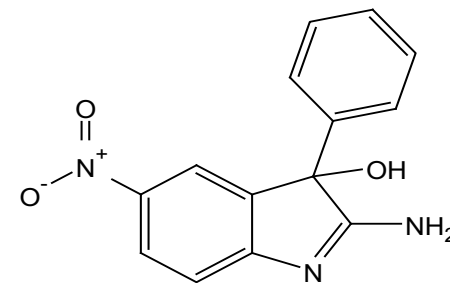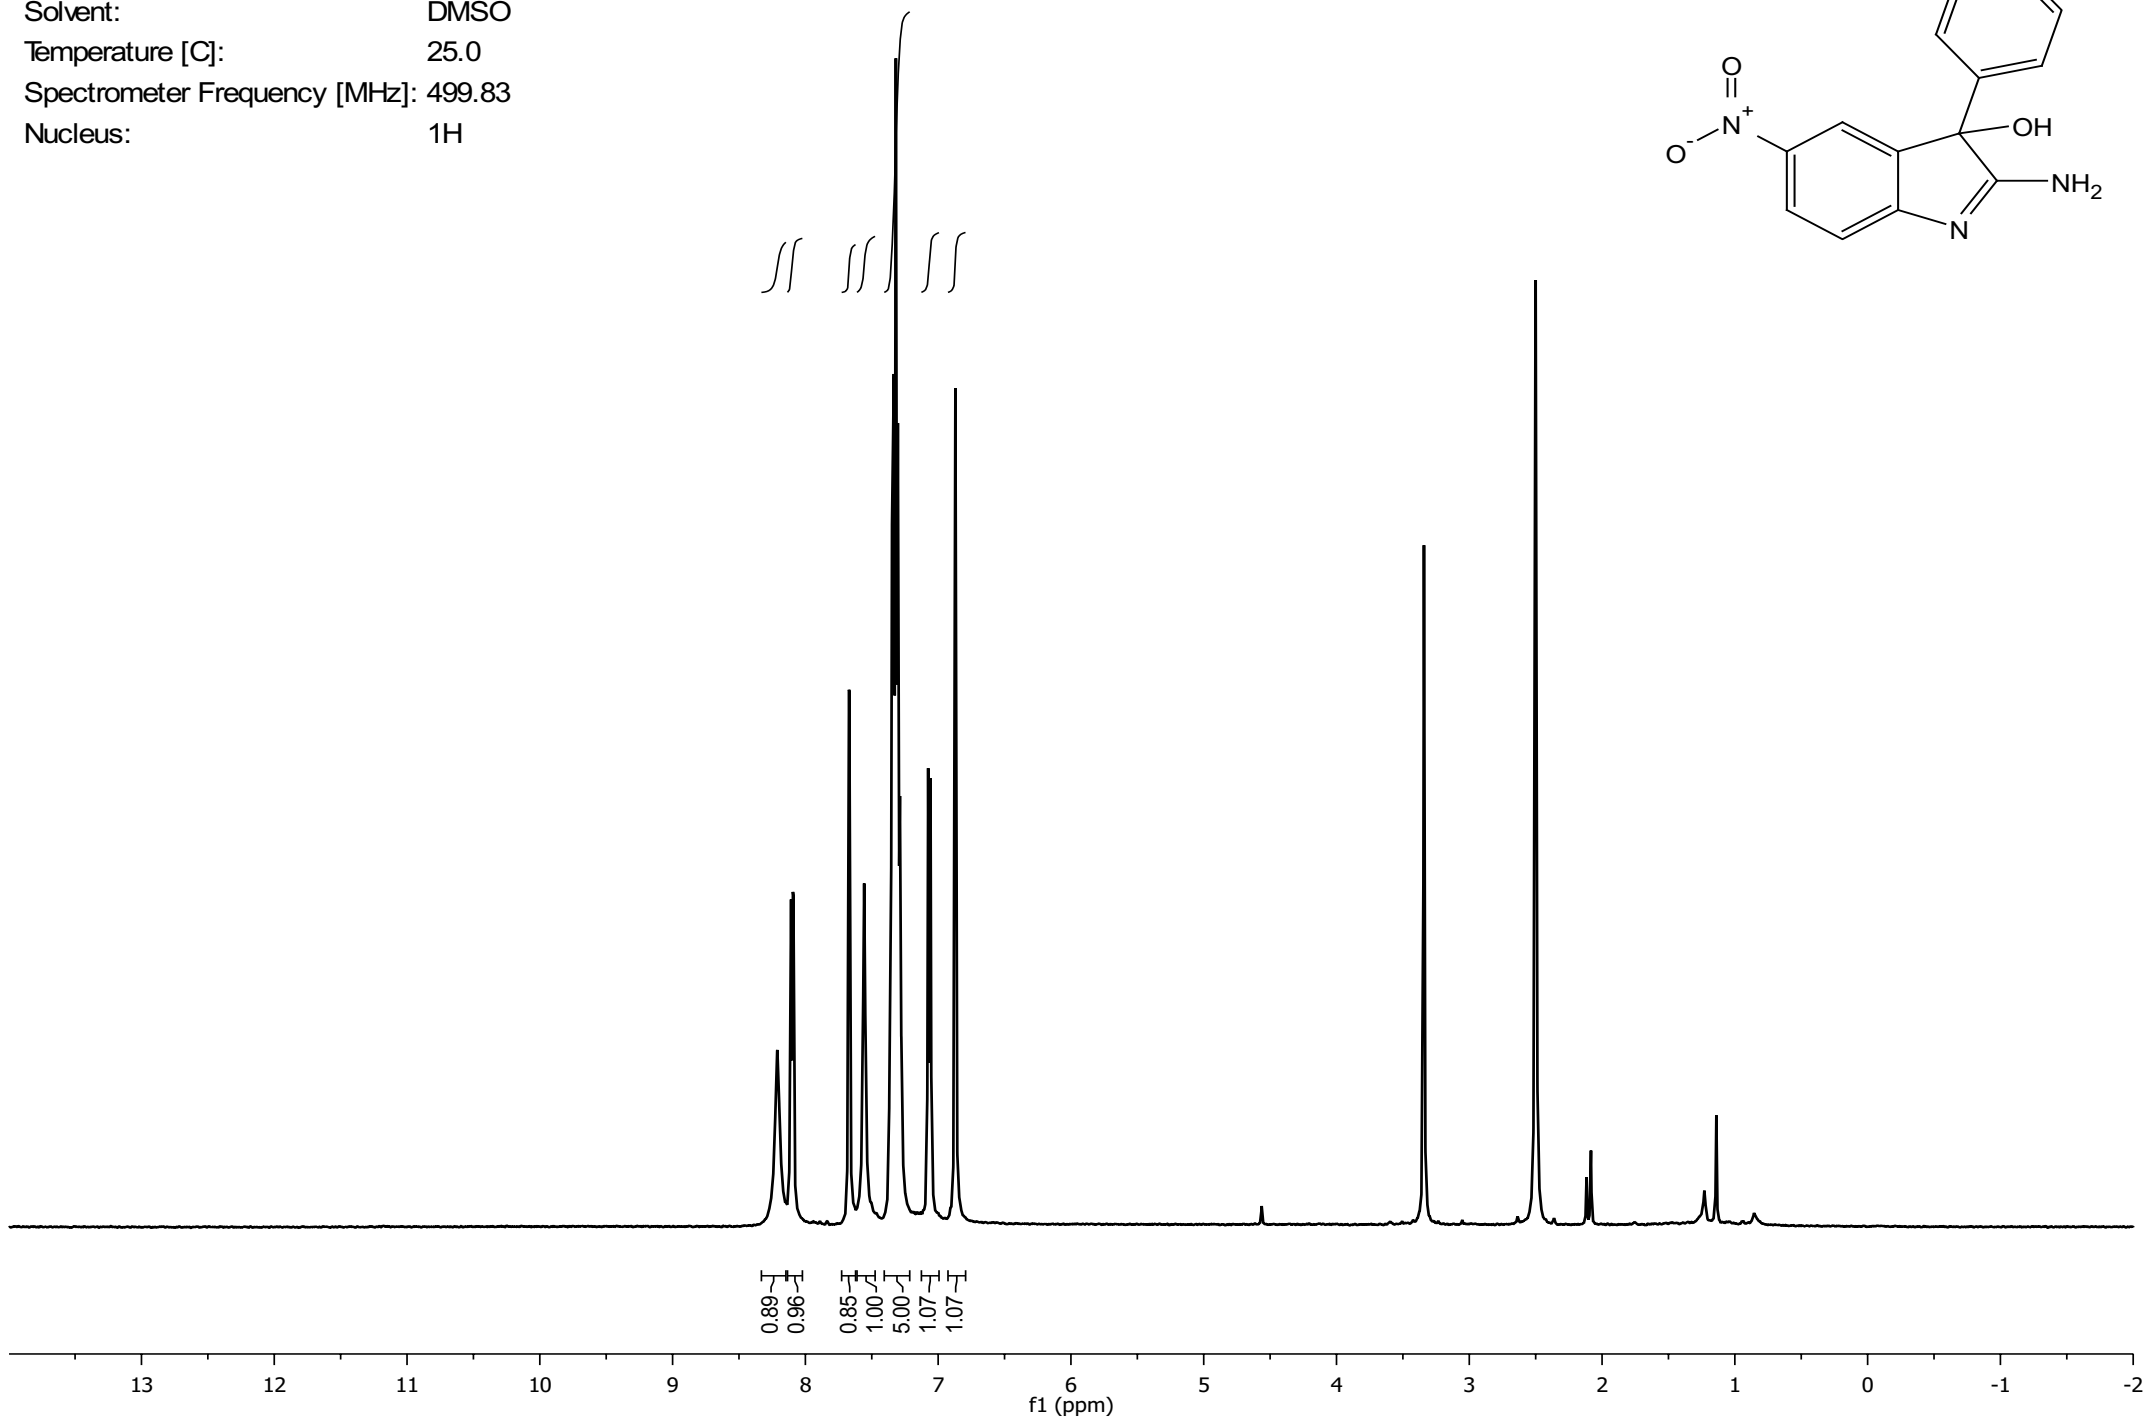

| Parameter                     | Value           |
|-------------------------------|-----------------|
| Solvent:                      | DMSO            |
| Temperature [K]:              | 22.0            |
| Spectrometer Frequency [MHz]: | 125.69          |
| Nucleus:                      | $^{13}\text{C}$ |

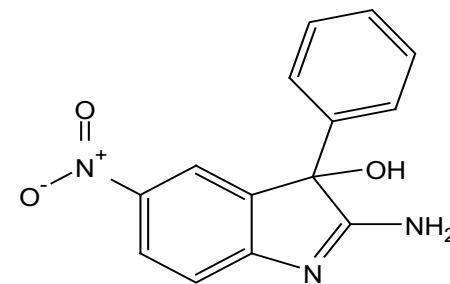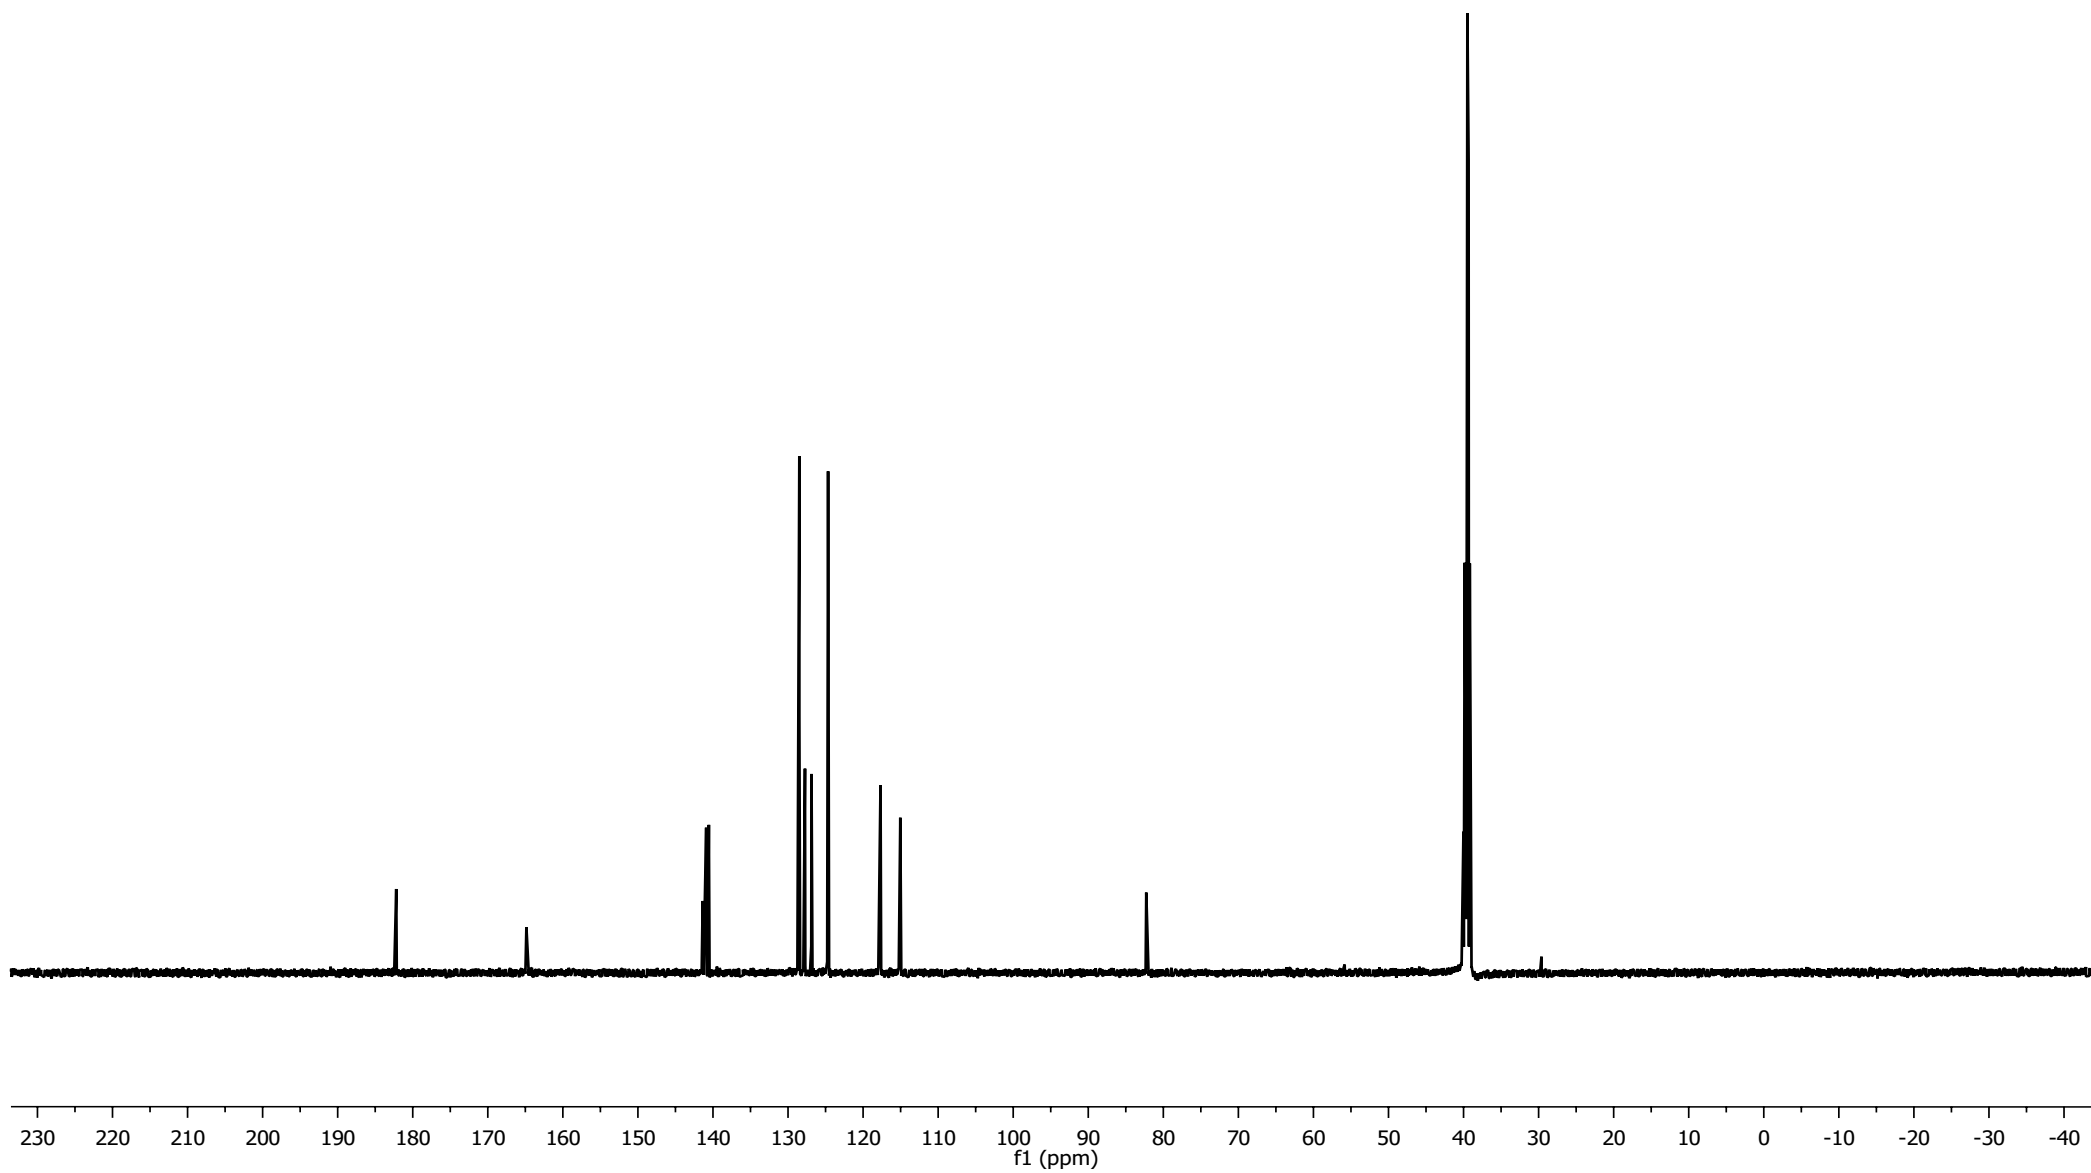

Parameter Value  
Solvent: DMSO  
Temperature [K]: 22.0  
Spectrometer Frequency [MHz]: 125.69  
Nucleus: <sup>13</sup>C

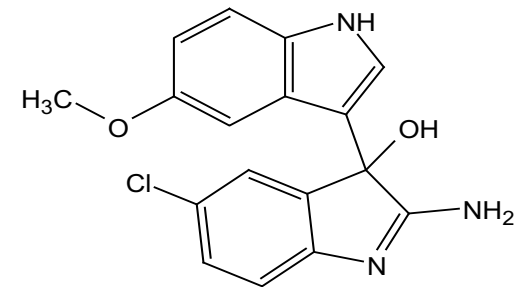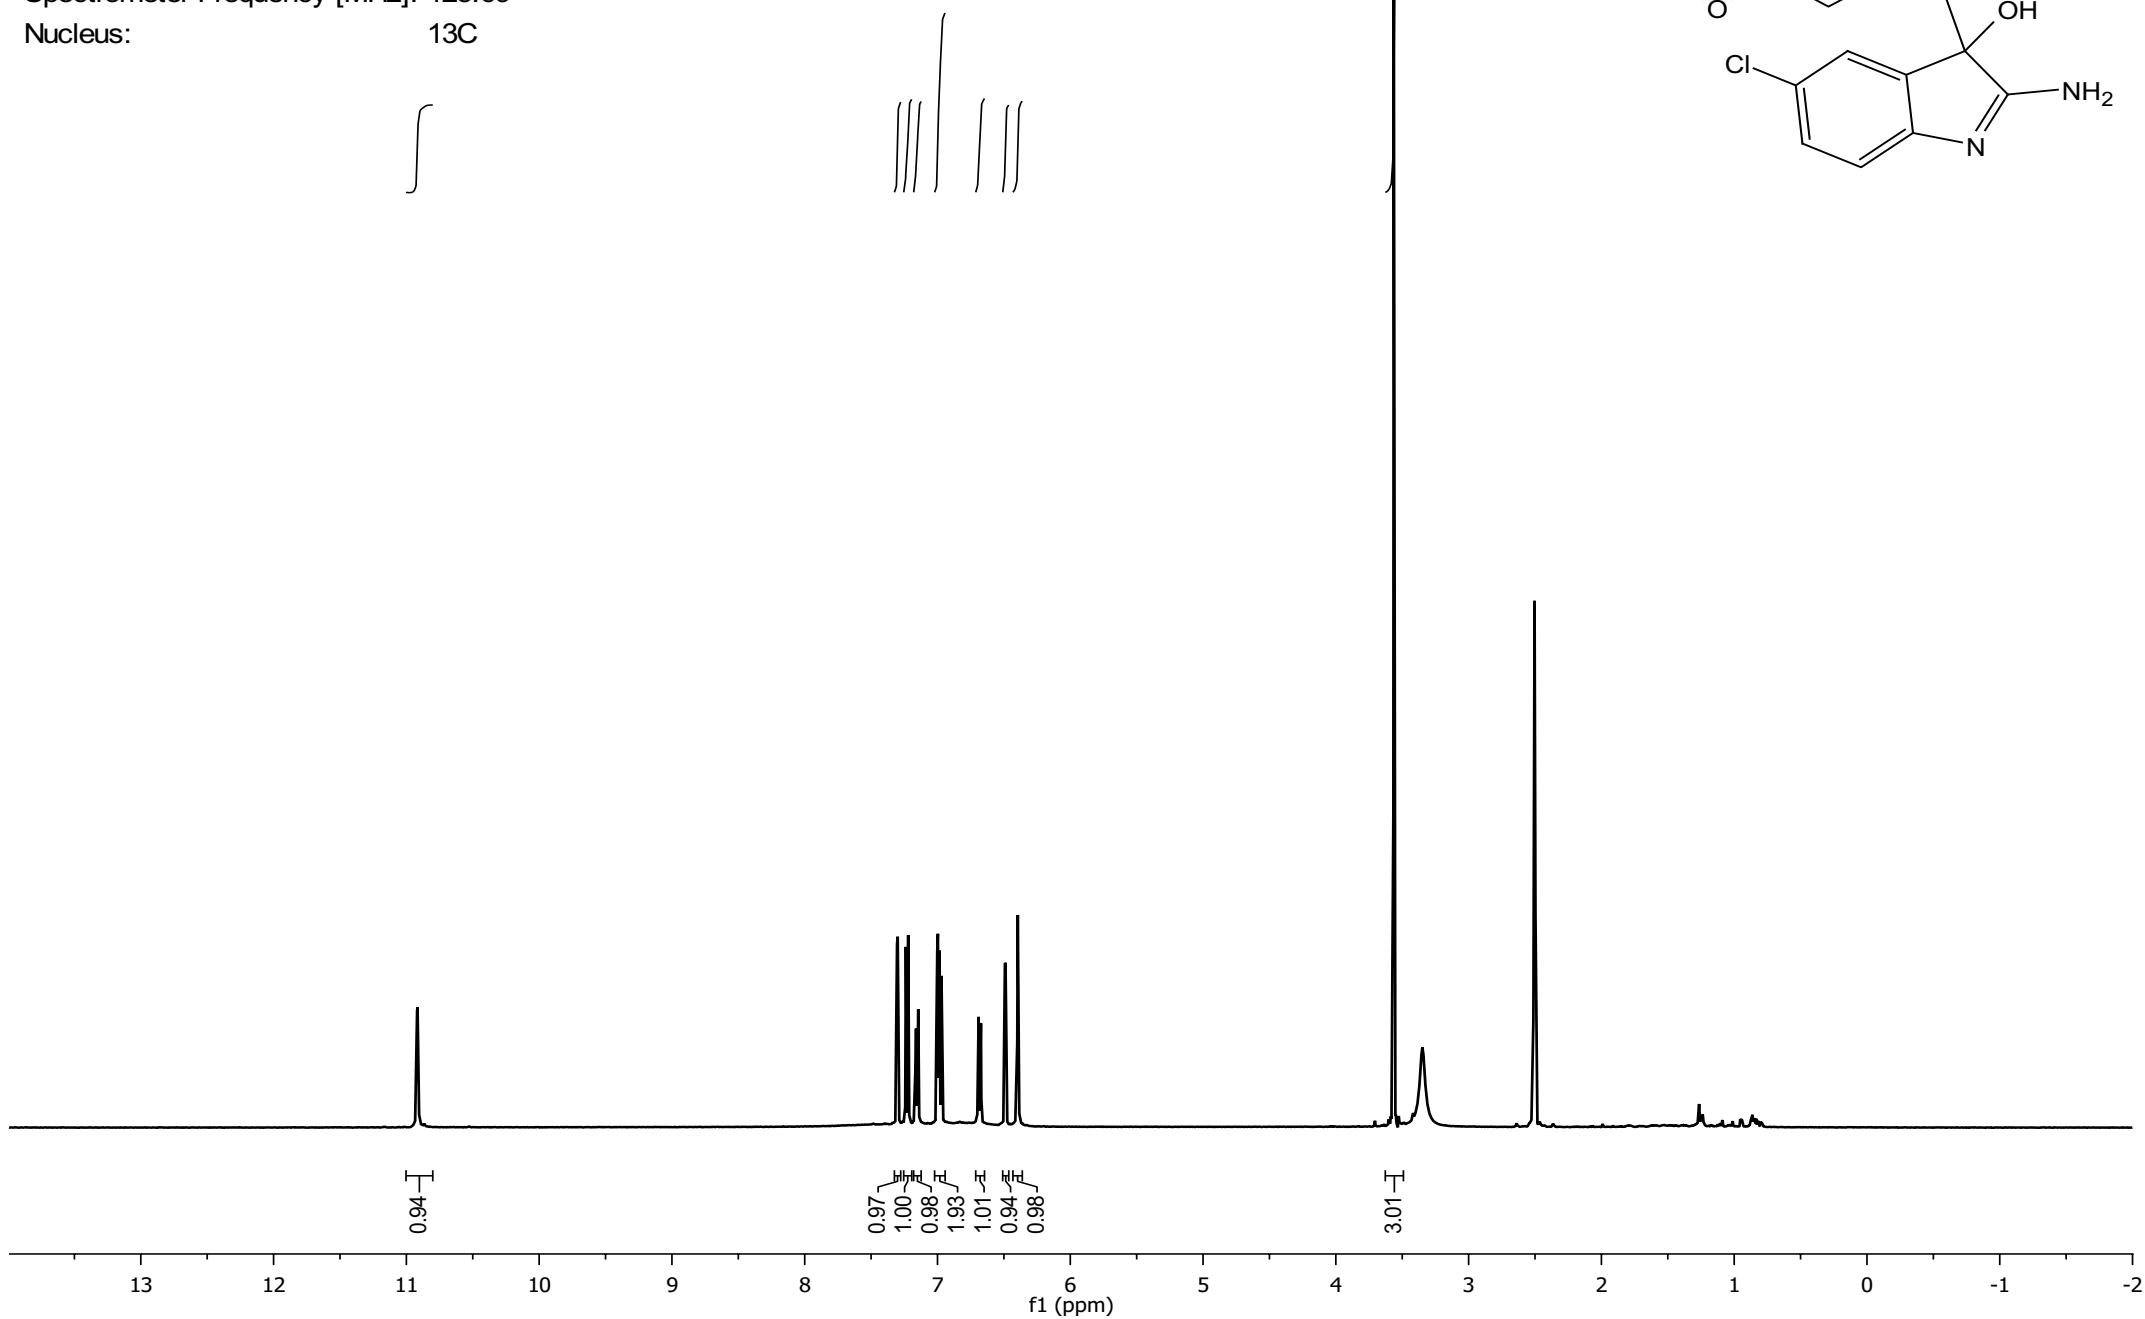

| Parameter                     | Value           |
|-------------------------------|-----------------|
| Solvent:                      | DMSO            |
| Temperature [K]:              | 22.0            |
| Spectrometer Frequency [MHz]: | 125.69          |
| Nucleus:                      | <sup>13</sup> C |

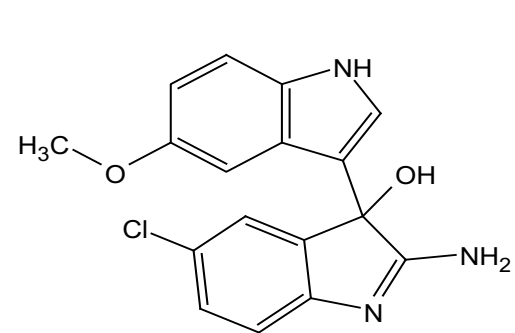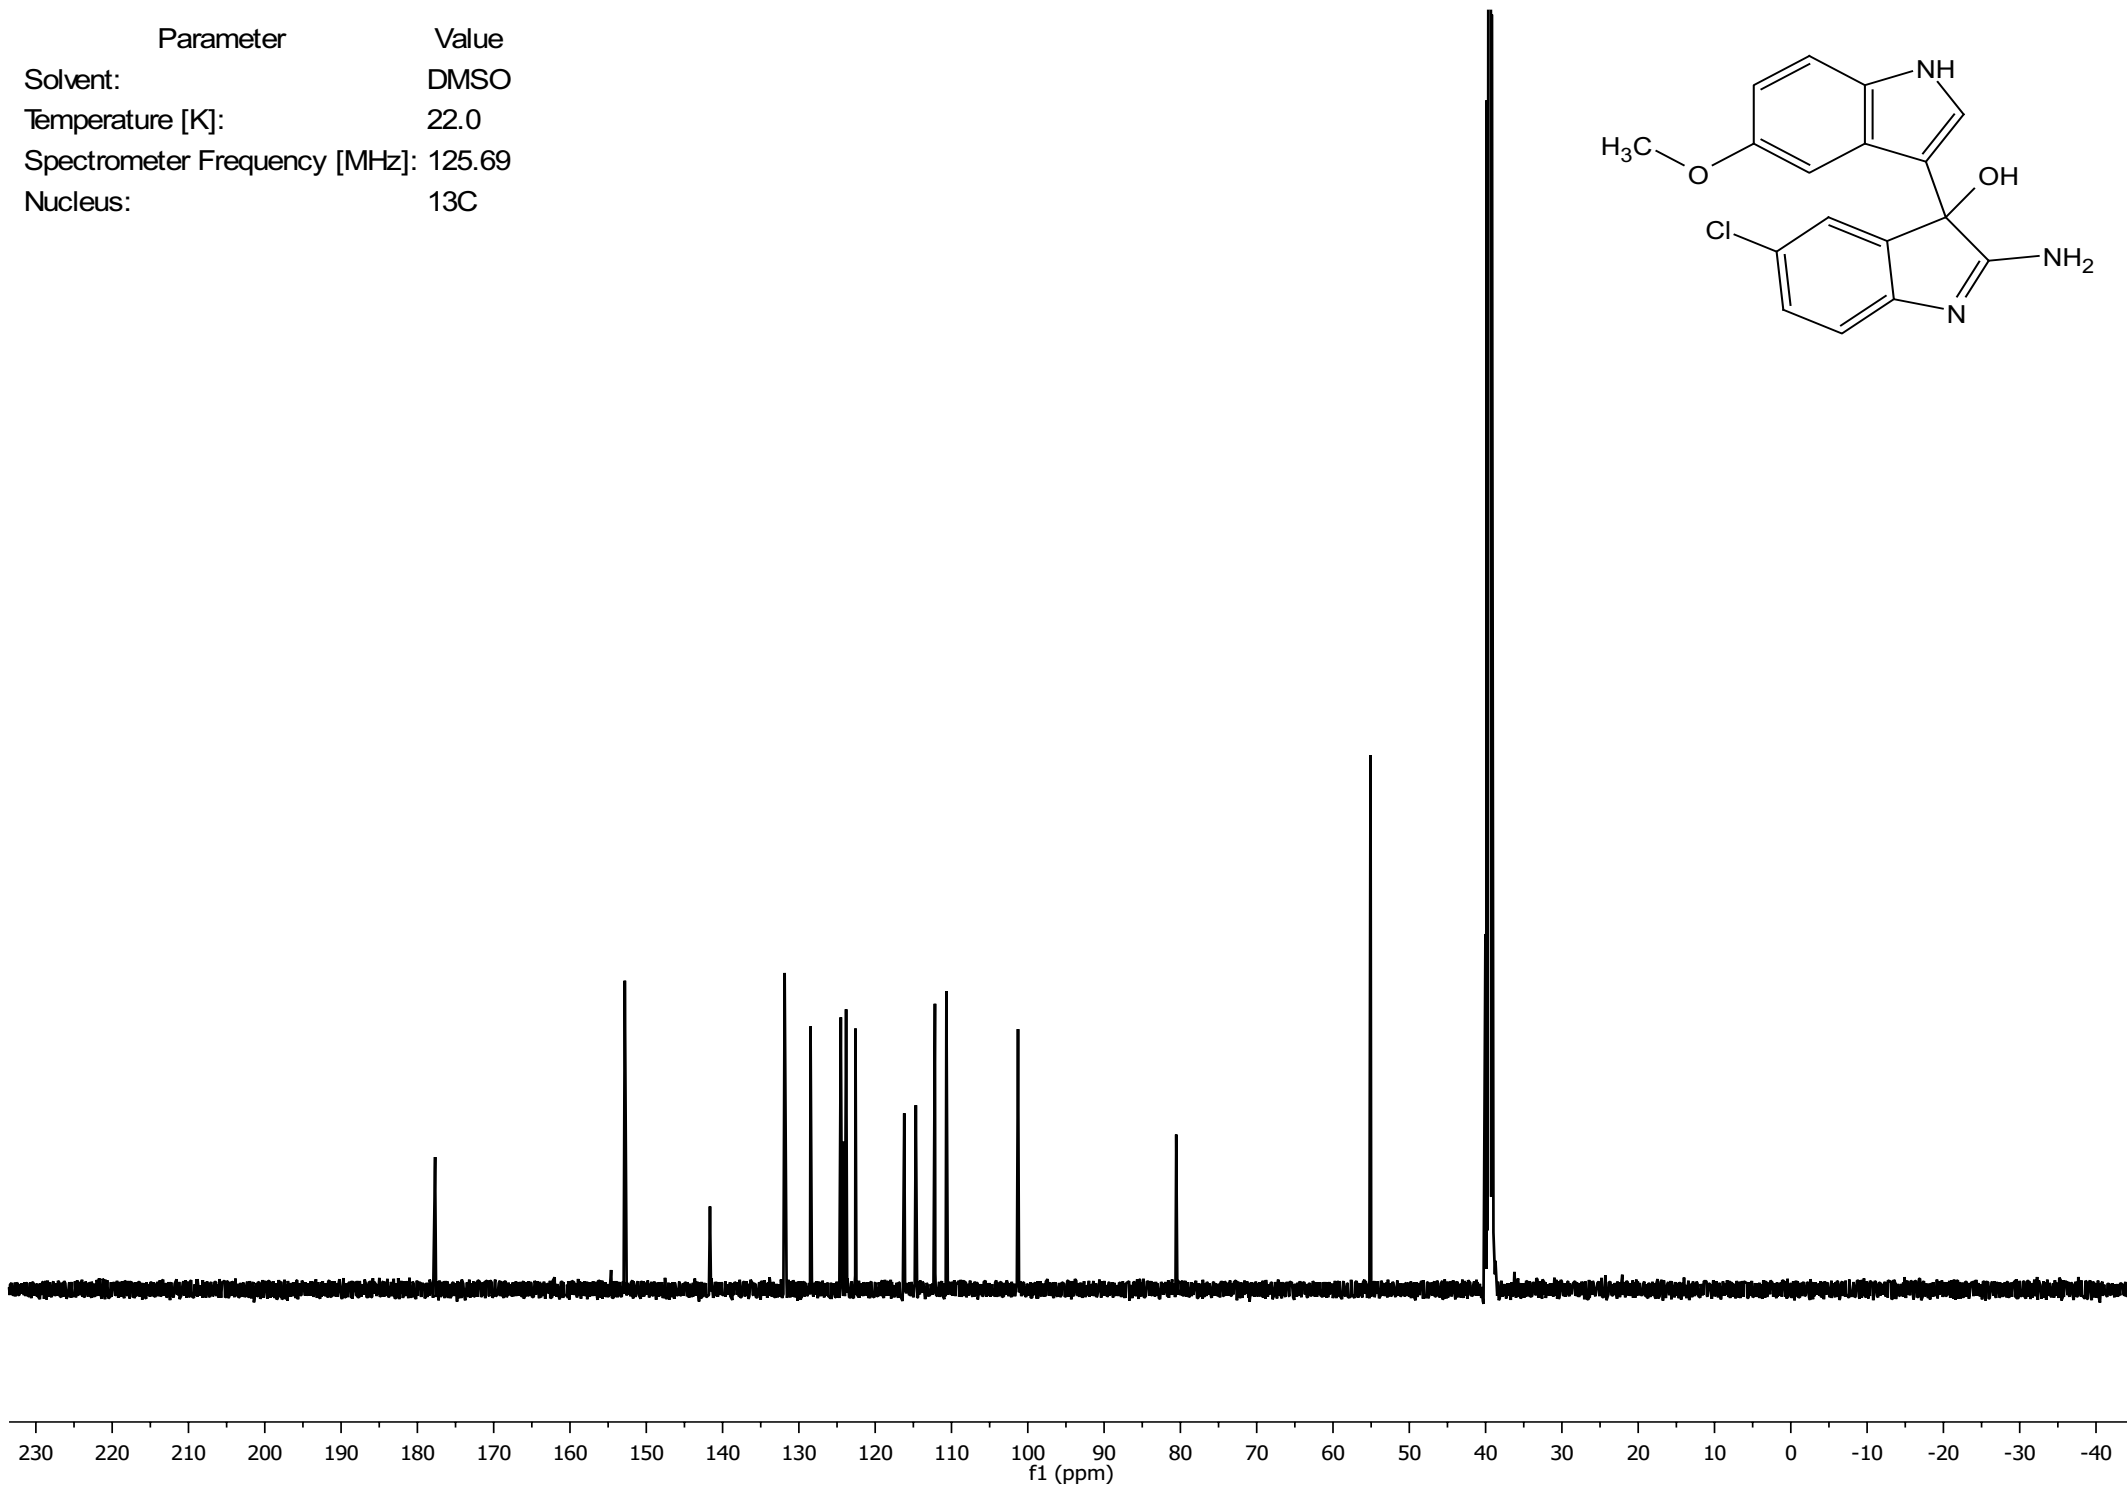



Parameter Value  
Solvent: DMSO  
Temperature [K]: 110.0  
Spectrometer Frequency [MHz]: 499.83  
Nucleus: <sup>1</sup>H

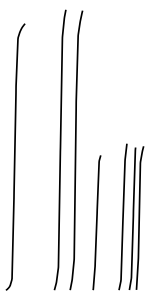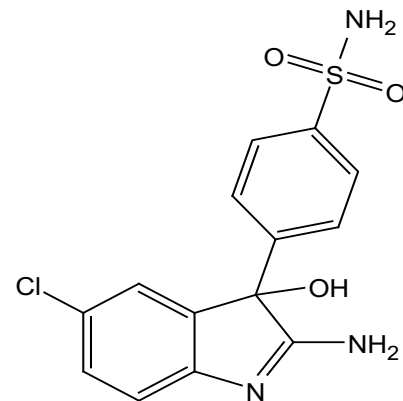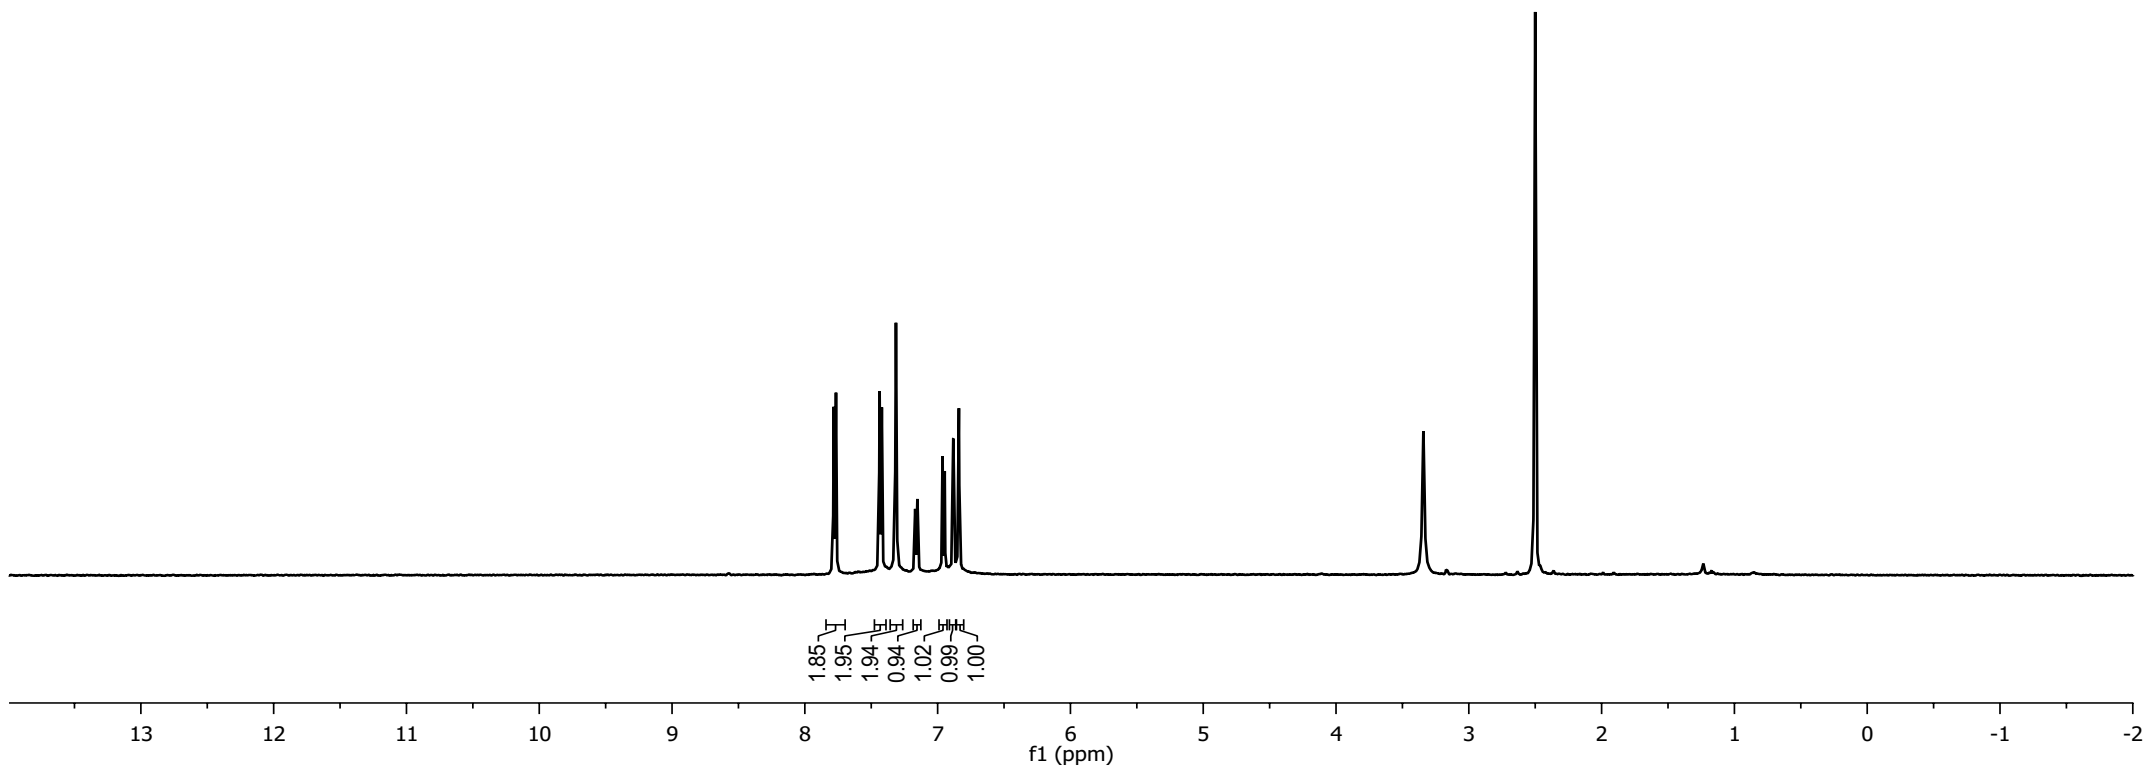

| Parameter                     | Value           |
|-------------------------------|-----------------|
| Solvent:                      | DMSO            |
| Temperature [K]:              | 110.0           |
| Spectrometer Frequency [MHz]: | 125.69          |
| Nucleus:                      | <sup>13</sup> C |

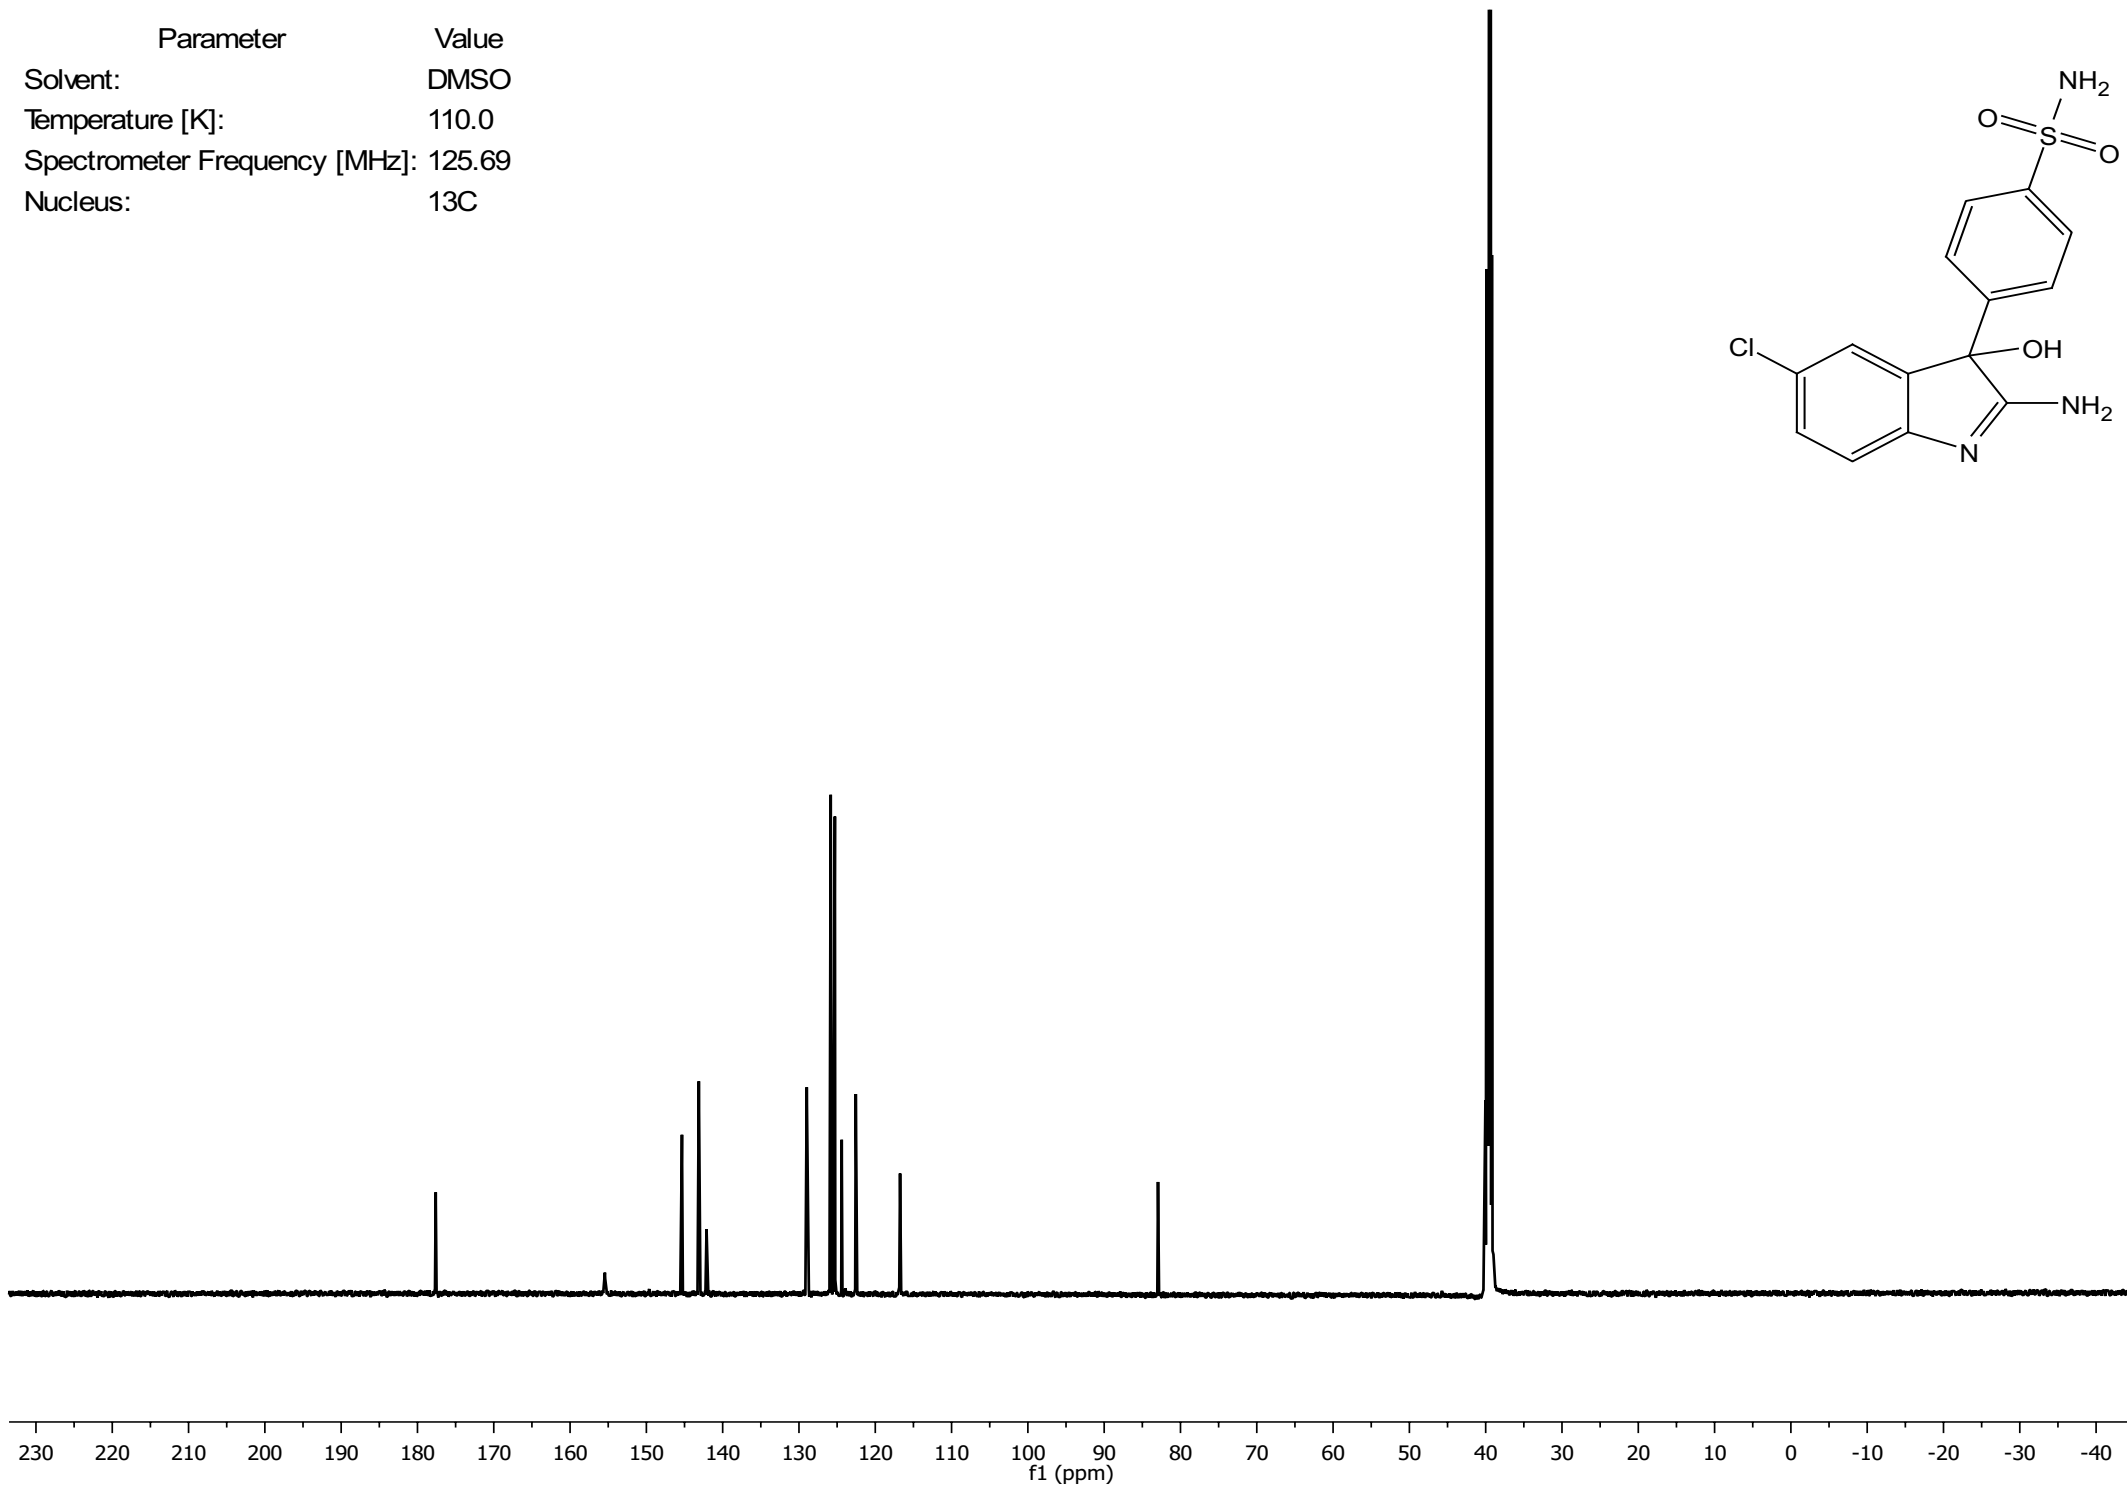

Parameter Value  
Solvent: DMSO  
Temperature [K]: 300.0  
Nucleus: 1H  
Spectrometer Frequency [MHz]: 300.13

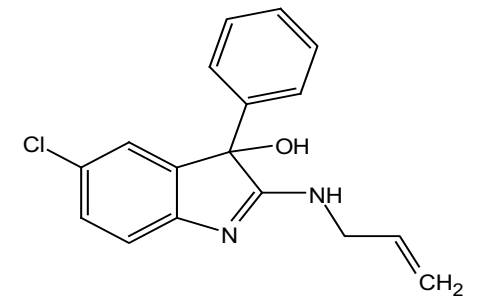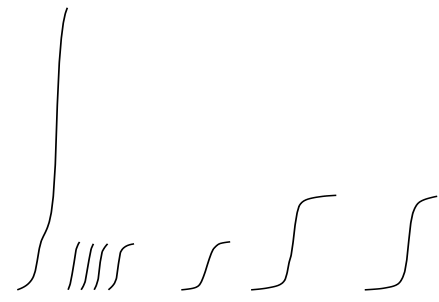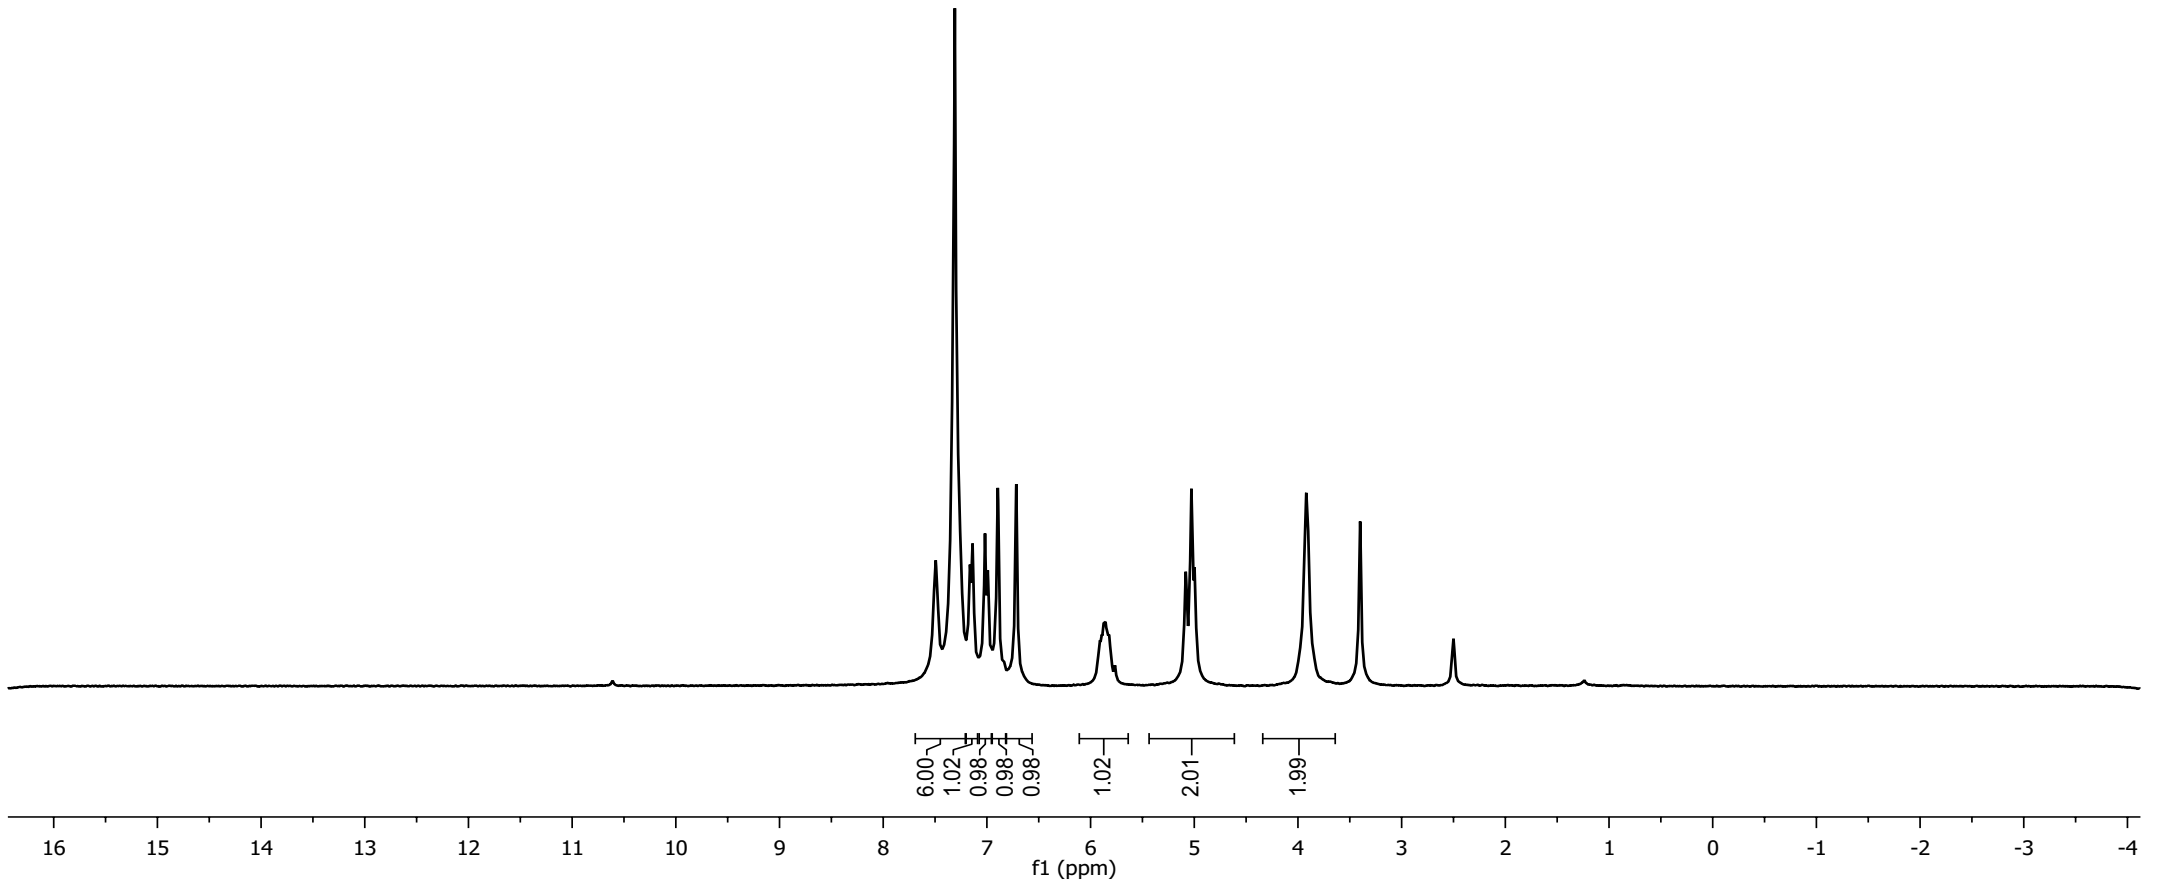

Parameter Value  
Solvent: DMSO  
Temperature [K]: 300.0  
Nucleus: <sup>13</sup>C  
Spectrometer Frequency [MHz]: 75.47

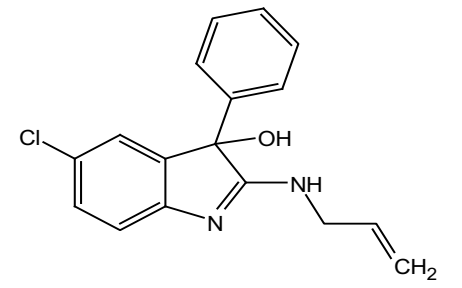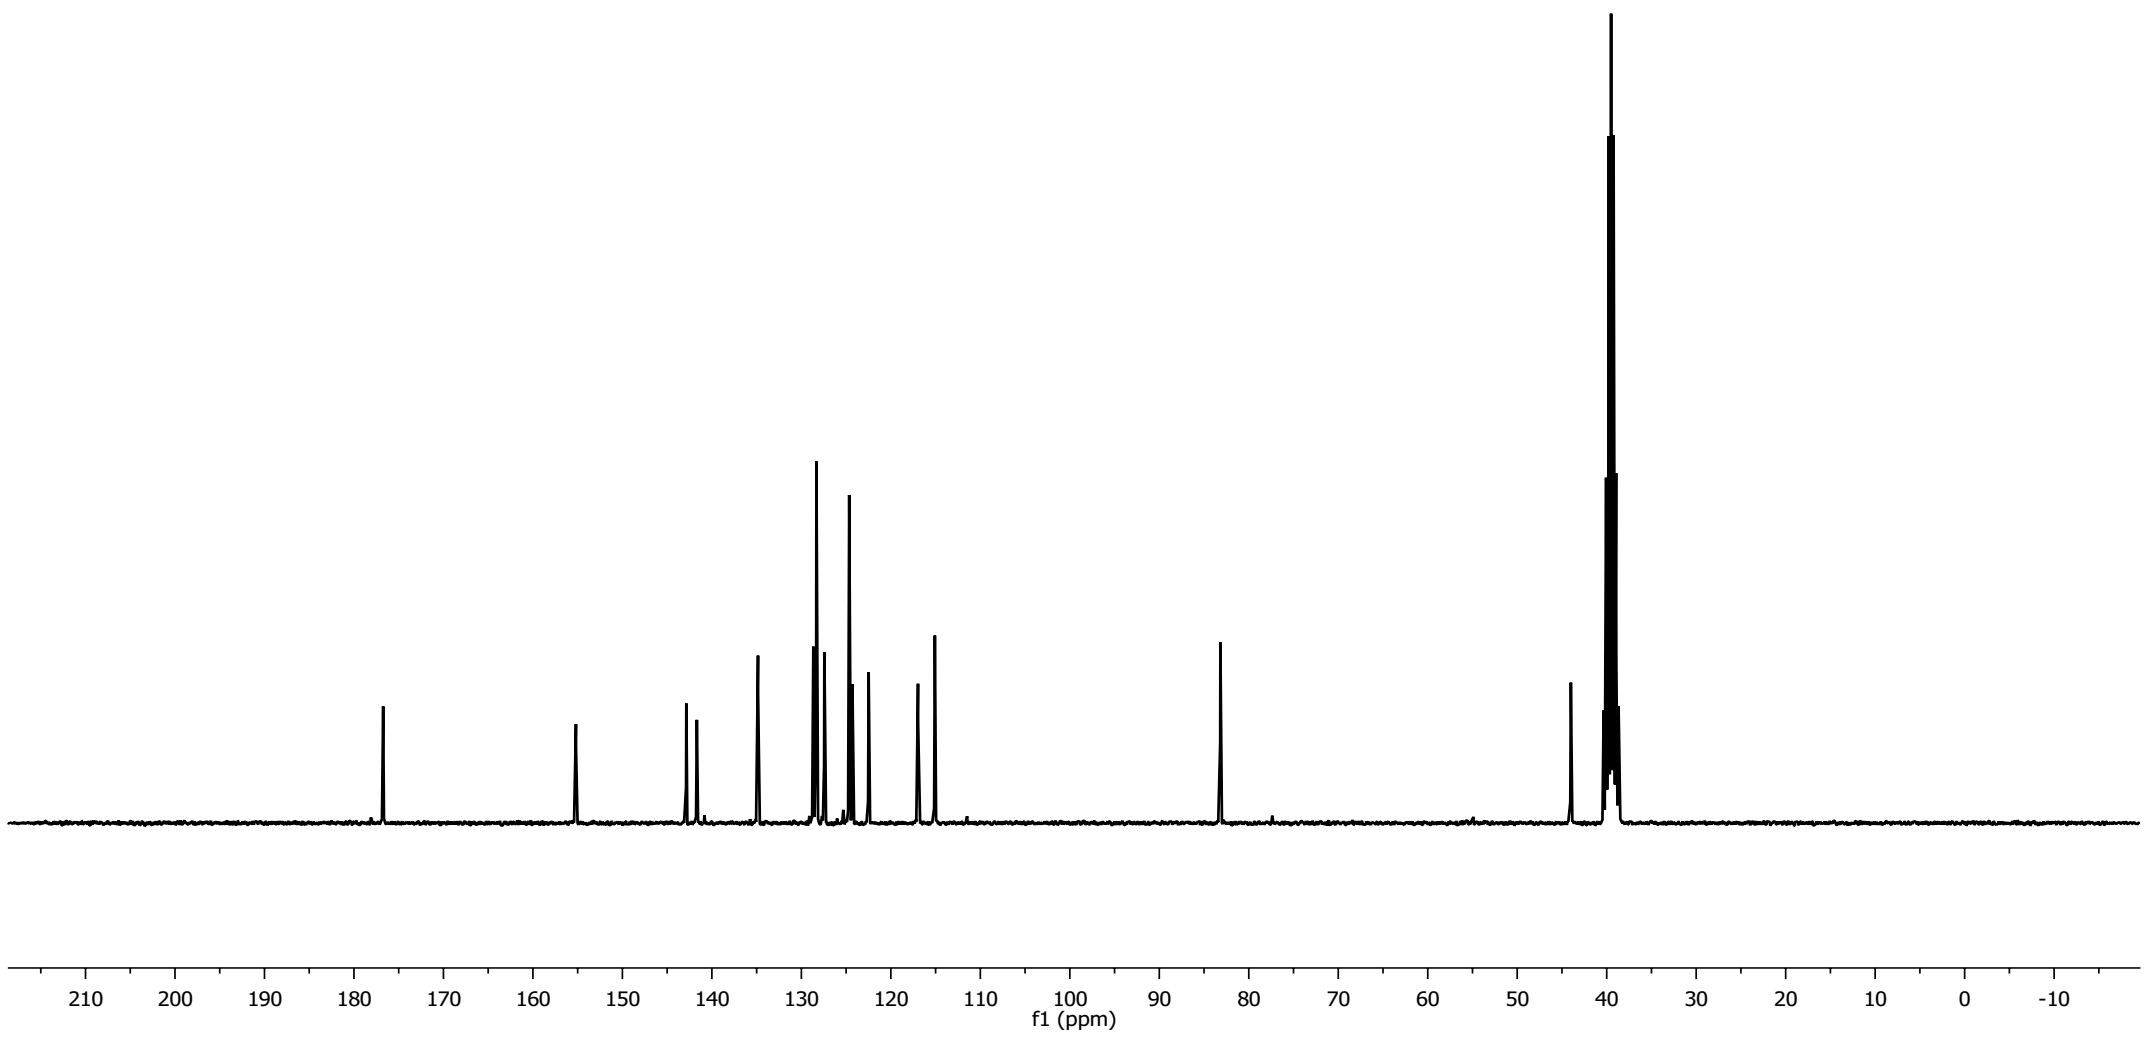

Parameter Value  
Solvent: DMSO  
Temperature [K]: 300.0  
Nucleus: 1H  
Spectrometer Frequency [MHz]: 300.13

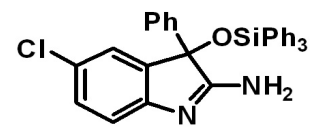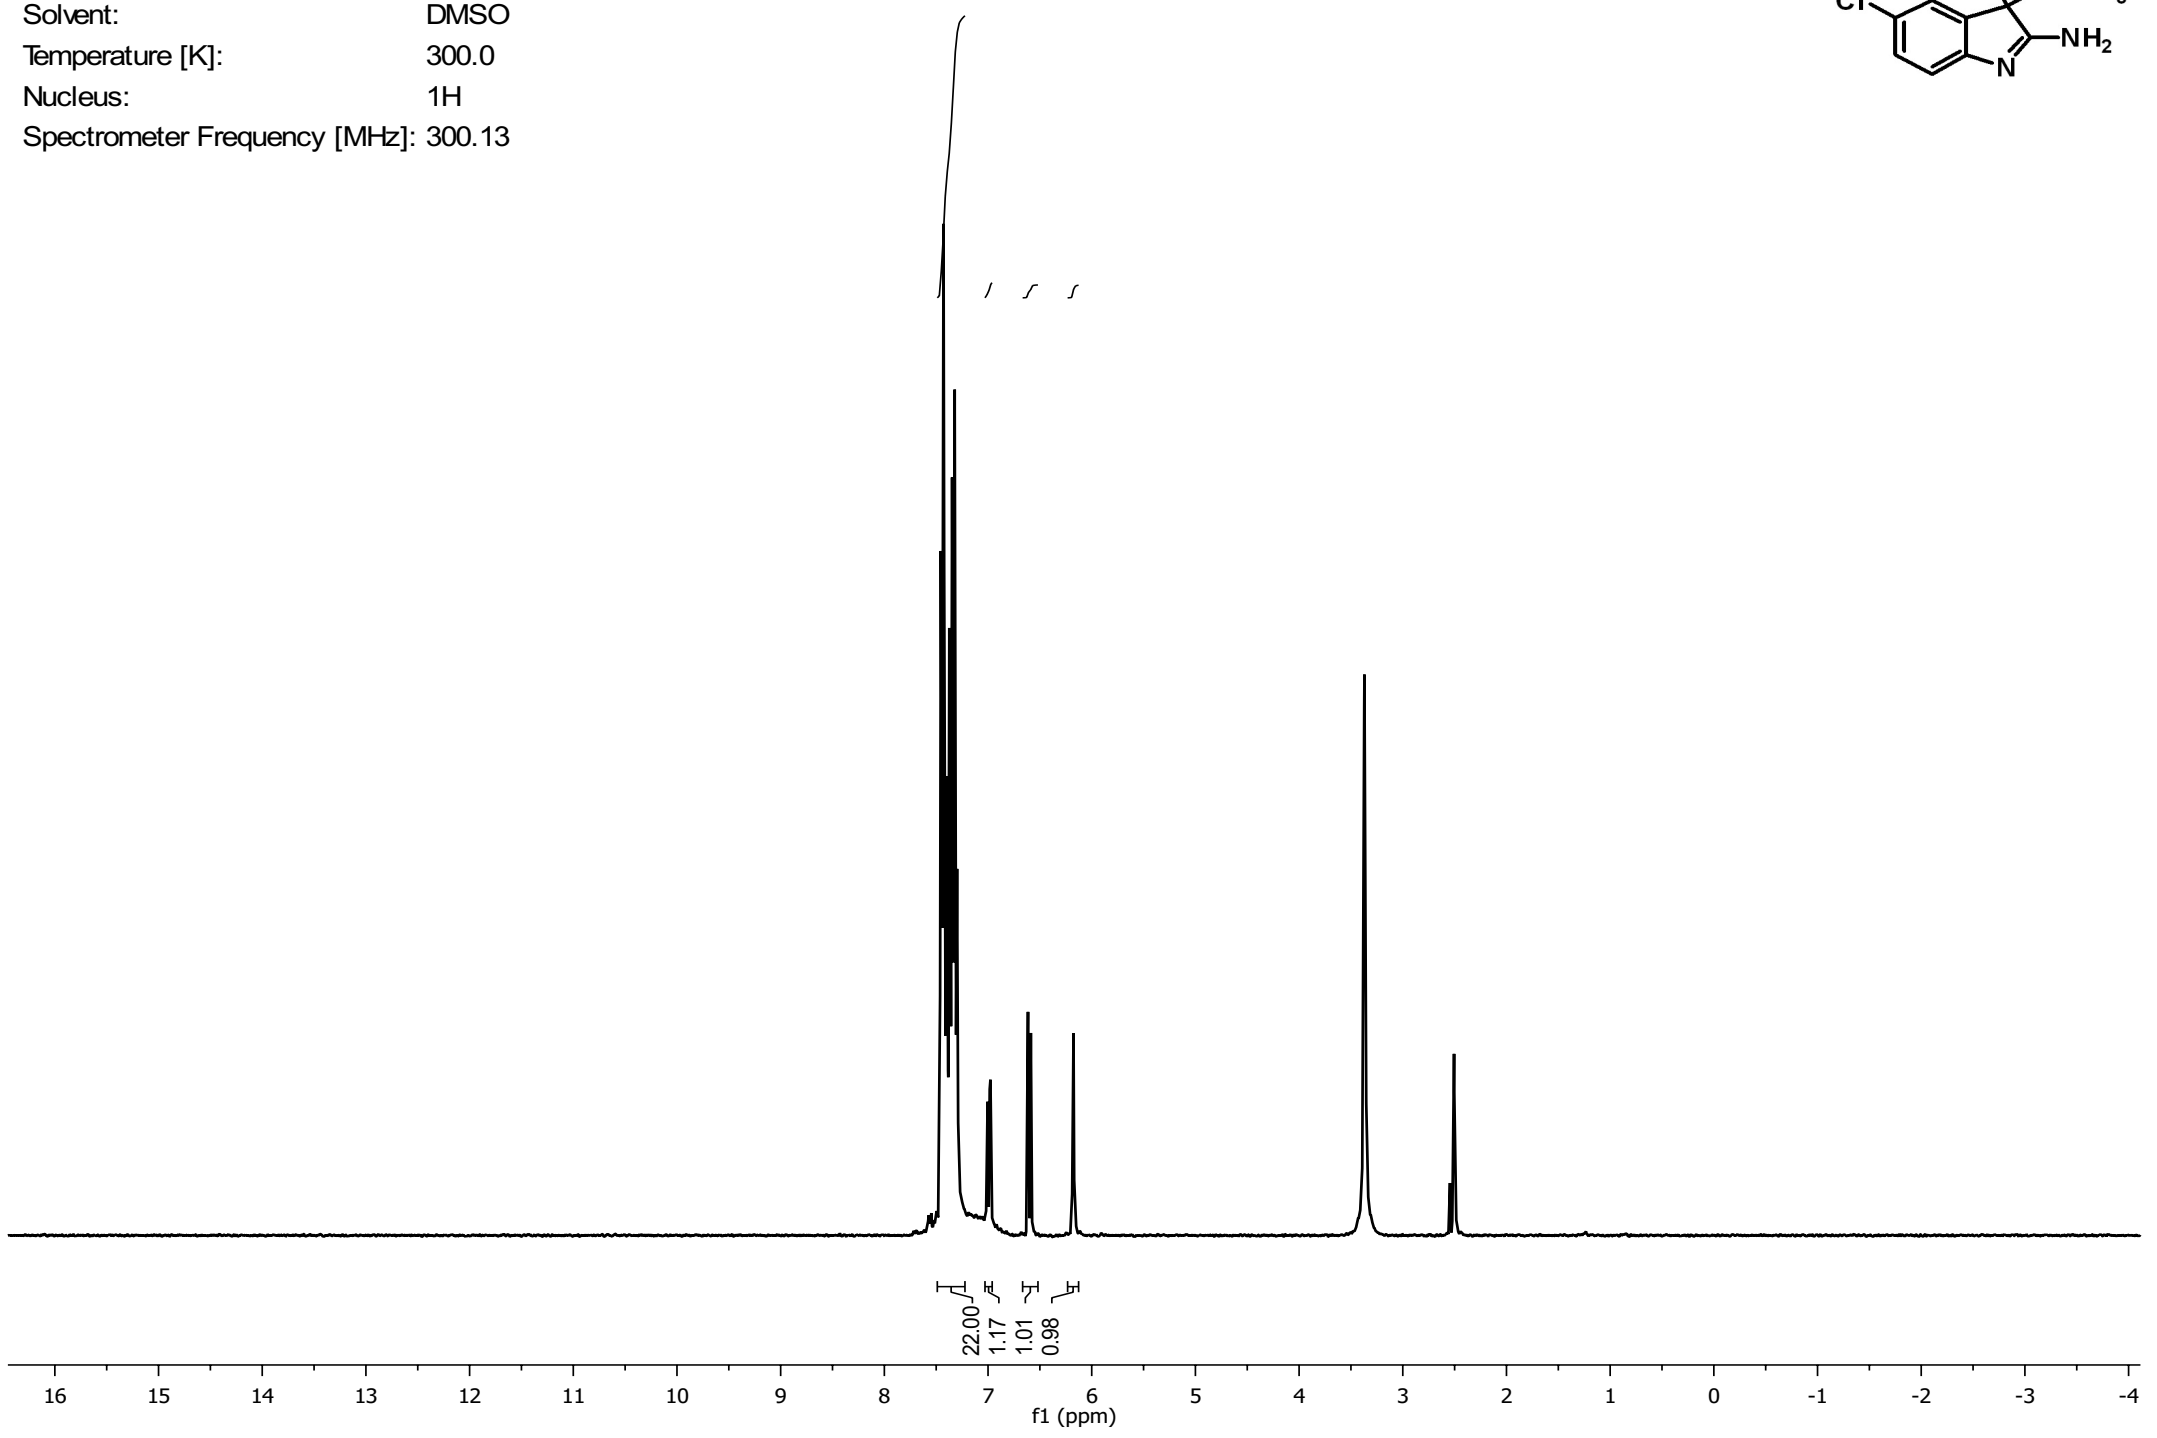

Parameter Value  
Solvent: DMSO  
Temperature [K]: 300.0  
Nucleus: <sup>13</sup>C  
Spectrometer Frequency [MHz]: 75.47

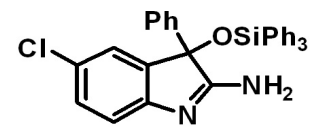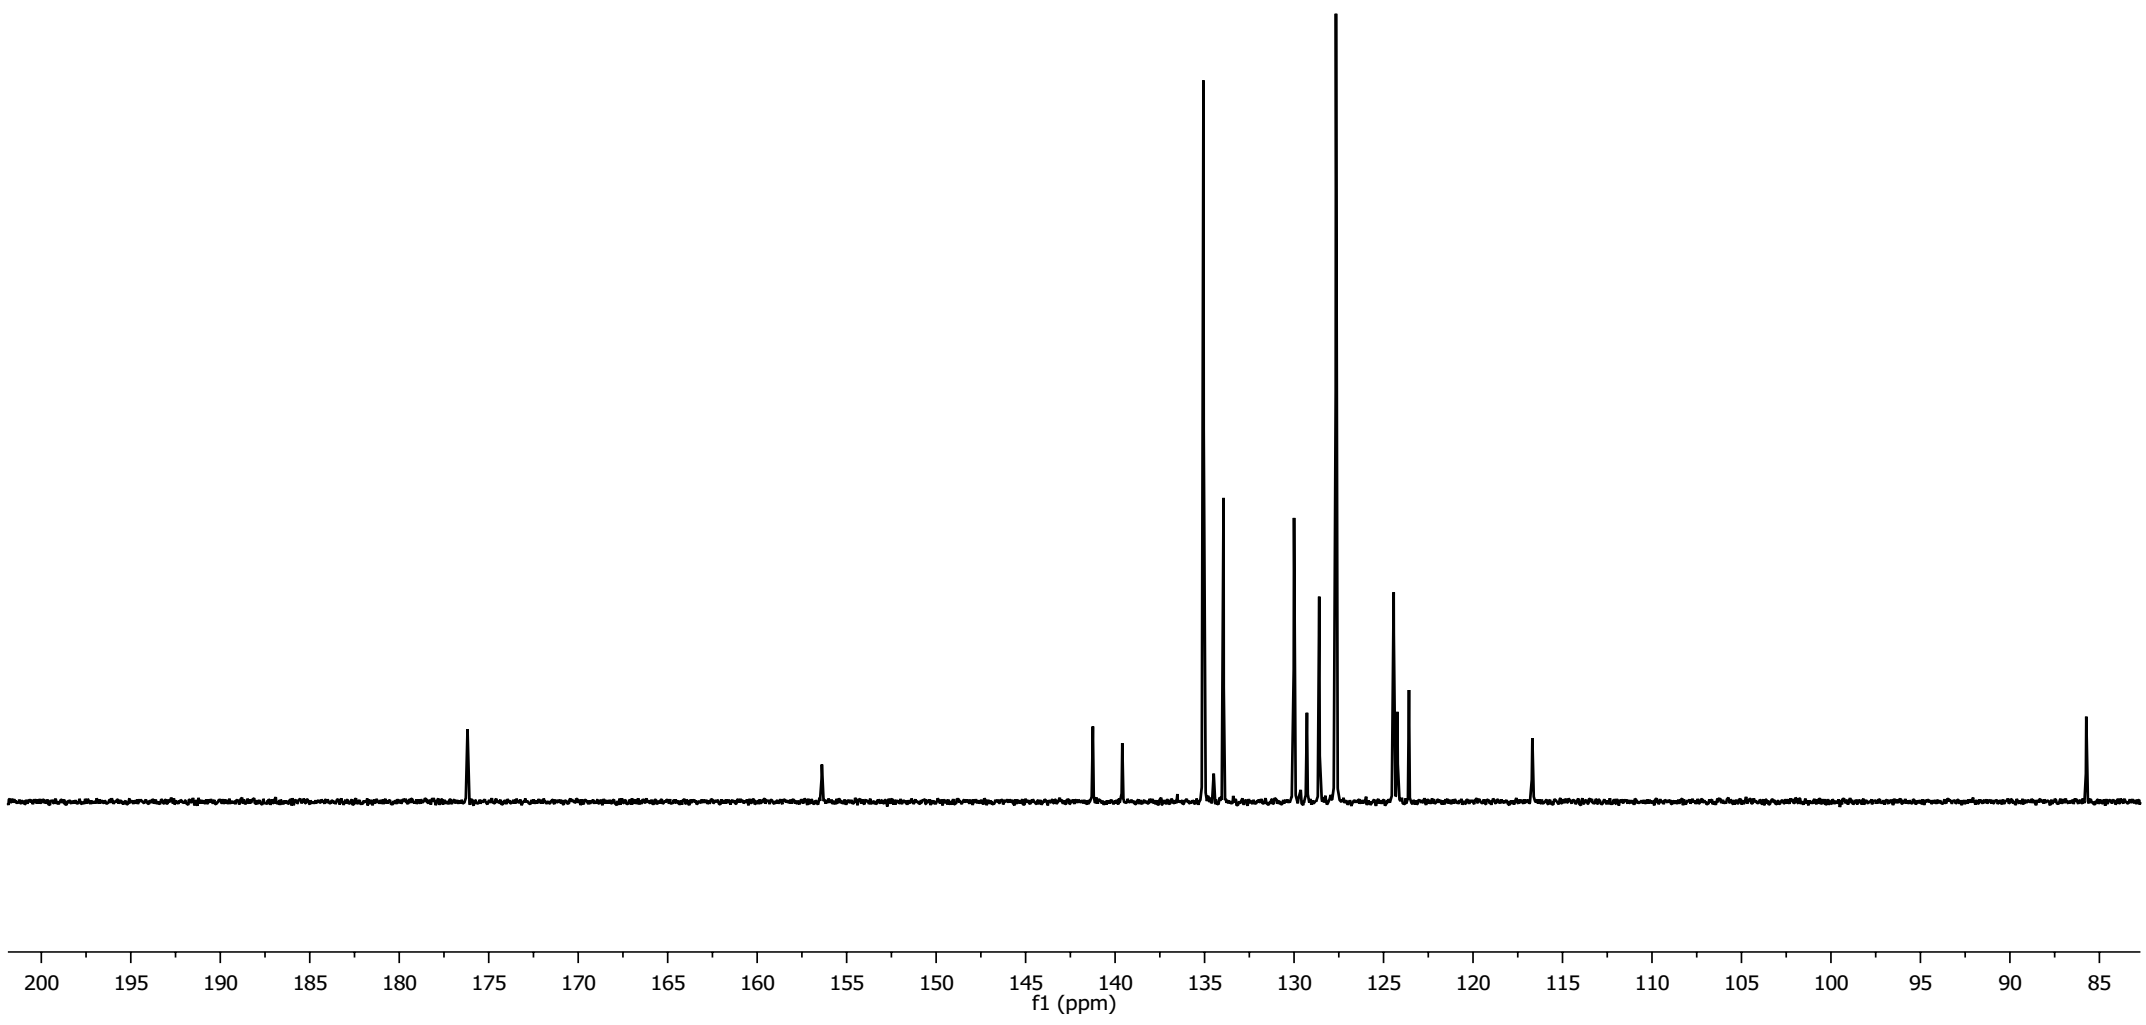

Supplement: NIHMS298615-supplement-NMR_spectra.pdf [file NIHMS298615-supplement-NMR_spectra.pdf]
